# Supplementary material for: Diphosphene with a phosphineborane tether and its rhodium complex
Source: Royal Society of Chemistry journal article supplement (doi:10.1039/d3dt03509c), 2023-12-11
Supplement: d3dt03509c1.pdf [file d3dt03509c1.pdf]

## Supporting Information

### Diphosphene with a Phosphineborane Tether and Its Rhodium Complex

Akihiro Tsurusaki,\* Shingo Takechi and Ken Kamikawa\*

Department of Chemistry, Graduate School of Science, Osaka Metropolitan University, Sakai,  
Osaka 599-8531, Japan

*E-mail: tsurusaki@omu.ac.jp; kamikawa@omu.ac.jp*

#### Table of Contents

|                                                             |     |
|-------------------------------------------------------------|-----|
| 1. Experimental                                             | S2  |
| 2. Spectral Data                                            | S9  |
| 3. Temperature-Dependent <sup>1</sup> H NMR Spectra         | S27 |
| 4. Ligand Exchange Reactions of Diphosphene–Rhodium Complex | S28 |
| 5. X-Ray Crystallographic Analysis                          | S33 |
| 6. UV-vis Spectra                                           | S36 |
| 7. Theoretical Calculations                                 | S37 |
| 8. References                                               | S50 |

## 1. Experimental

**General.** All anaerobic and/or moisture-sensitive manipulations were carried out with conventional Schlenk techniques under a nitrogen atmosphere or with glovebox techniques under an argon atmosphere. Analytical thin-layer chromatography (TLC) was performed using Silicagel 70 F<sub>254</sub> TLC Plate-Wako. The developed chromatogram was viewed under a UV lamp (254 nm). Silica gel column chromatography was performed with Wako-gel® 60N (Wako, 150–425 μm, irregular) or Silica Gel 60 (Nacalai Tesque Inc., spherical, neutral) under an argon atmosphere. Preparative thin-layer chromatography (PTLC) was performed using Silicagel 70 PF<sub>254</sub> TLC Plate-Wako. <sup>1</sup>H NMR (400 or 500 MHz), <sup>13</sup>C NMR (100 or 125 MHz), <sup>31</sup>P NMR (162 MHz), <sup>11</sup>B NMR (129 MHz), and <sup>19</sup>F NMR (378 MHz) spectra were measured in CDCl<sub>3</sub> and CD<sub>2</sub>Cl<sub>2</sub> with a JEOL JNM-ECS400 or JEOL JNM-ECZ500R spectrometer. Signals of tetramethylsilane (0.0 ppm) in CDCl<sub>3</sub> and CHDCl<sub>2</sub> (5.32 ppm) in CD<sub>2</sub>Cl<sub>2</sub> in the <sup>1</sup>H NMR spectra; and CDCl<sub>3</sub> (77.16 ppm) and CD<sub>2</sub>Cl<sub>2</sub> (53.84 ppm) in the <sup>13</sup>C NMR spectra were used as internal references. <sup>31</sup>P, <sup>11</sup>B, and <sup>19</sup>F NMR chemical shifts were externally referenced to 85% H<sub>3</sub>PO<sub>4</sub> (0 ppm), BF<sub>3</sub>·OEt<sub>2</sub> (0 ppm), and CFCl<sub>3</sub> (0 ppm), respectively. Chemical shifts are reported in ppm downfield. Low- and high-resolution mass spectra were recorded on a JEOL JMS-700 spectrometer in the FAB (3-nitrobenzyl alcohol) mode or a Bruker micrOTOF II time-of-flight mass spectrometer (ESI). IR samples were prepared by the KBr plate method (JASCO Tablet Master), and IR spectra were measured on a JASCO FT/IR-4100 spectrometer. All melting points were determined on a Yanaco micro melting point apparatus (MP-J3) and were uncorrected. The melting points of phosphine **3'**, dichlorophosphine **2**, diphosphene–phosphineborane ligand **1**, and diphosphene–rhodium complex **7** were measured under an argon atmosphere in a sealed tube.

**Reagents.** Acetonitrile, dichloromethane, Et<sub>2</sub>O, THF, toluene, 1,4-dioxane (Wako, super dehydrated grade), and 1,2-dichloroethane (Aldrich, anhydrous) were purchased and used as received. CDCl<sub>3</sub> (CIL) and CD<sub>2</sub>Cl<sub>2</sub> (CIL) used in a glovebox were dried over calcium hydride, degassed by freeze-pump-thaw cycles, distilled in a vacuum line, and stored in a glovebox. Sodium iodide (Aldrich), chlorodiphenylphosphine (Wako), hydrogen peroxide in aqueous solution (Wako), triethoxysilane (TCI), titanium(IV) tetraisopropoxide (Wako), borane–tetrahydrofuran complex (1.03 M in THF; Aldrich), *n*-butyllithium (1.6 M in hexane; Mitsuwa), and *tert*-butyllithium (1.55 M in pentane; Kanto) were purchased and used as received. Phosphorus trichloride was distilled from calcium hydride prior to use. *N*-Methylpyrrolidine, triethylamine, *N,N,N,N*-tetramethylethylenediamine (tmeda), and pyridine (py) were distilled from sodium hydroxide prior to use. 2-Bromo-3,5-di-*tert*-butyl-1-(hydroxymethyl)benzene (**4**),<sup>S1</sup> 2-bromo-1-bromomethyl-3,5-di-*tert*-butyl-benzene (**6**),<sup>S1</sup> Ph<sub>2</sub>PH·BH<sub>3</sub>,<sup>S2</sup> <sup>t</sup>Bu(Me<sub>3</sub>Si)NH,<sup>S3</sup> Mes\*PH<sub>2</sub>,<sup>S4</sup> and [Rh(cod)<sub>2</sub>]BF<sub>4</sub><sup>S5</sup> were synthesized according to the reported procedures.

### Synthesis of (2-bromo-3,5-di-*tert*-butylphenyl)methyldiphenylphosphine oxide (5).

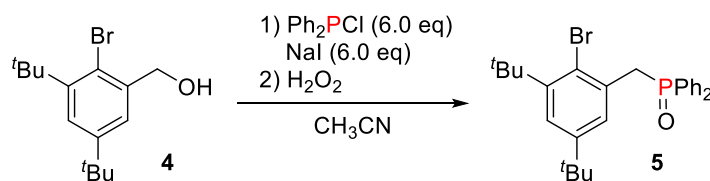

This compound was prepared according to the similar method to the reported procedure.<sup>S6</sup> To a solution of 2-bromo-3,5-di-*tert*-butyl-1-(hydroxymethyl)benzene (**4**, 9.81 g, 32.8 mmol) and sodium iodide (24.6 g, 164 mmol) in  $\text{CH}_3\text{CN}$  (80 mL) was added chlorodiphenylphosphine (36.2 g, 164 mmol). After the reaction mixture was stirred at reflux for 14 h,  $\text{H}_2\text{O}_2$  aq. was added dropwise at 0 °C. The reaction mixture was stirred at room temperature for 10 min, and then quenched with  $\text{Na}_2\text{SO}_3$  aq. The organic layer was separated, and then the aqueous layer was extracted with ethyl acetate. The combined organic layer was washed with brine, dried over  $\text{MgSO}_4$ , filtered through a pad of Celite, and then evaporated under reduced pressure. The residue was chromatographed on silica gel with hexane/ethyl acetate = 1/1 ( $R_f = 0.45$ ) to give **5** as a colorless solid (13.3 g, 27.5 mmol, 84%).

Mp. 181-182 °C.  $^1\text{H}$  NMR (400 MHz,  $\text{CDCl}_3$ )  $\delta = 1.21$  (s, 9H, *t*Bu), 1.42 (s, 9H, *t*Bu), 4.05 (d,  $J = 14.4$  Hz, 2H,  $\text{CH}_2$ ), 7.30 (dd,  $J = 2.5, 2.5$  Hz, 1H, aromH), 7.31 (dd,  $J = 2.5, 2.5$  Hz, 1H, aromH), 7.38-7.43 (m, 4H, Ph), 7.47-7.51 (m, 2H, Ph), 7.63-7.68 (m, 4H, Ph);  $^{13}\text{C}$   $\{^1\text{H}\}$  NMR (100 MHz,  $\text{CDCl}_3$ )  $\delta = 30.2$  ( $\text{CH}_3$ ), 31.2 ( $\text{CH}_3$ ), 34.7 (C), 37.6 (C), 39.5 (d,  $J = 66.5$  Hz,  $\text{CH}_2$ ), 123.3 (d,  $J = 7.7$  Hz, C), 124.1 (d,  $J = 2.8$  Hz, CH), 127.2 (d,  $J = 4.8$  Hz, CH), 128.5 (d,  $J = 11.6$  Hz, CH), 131.5 (d,  $J = 8.7$  Hz, CH), 131.8 (d,  $J = 2.9$  Hz, CH), 132.2 (d,  $J = 98.3$  Hz, C), 132.8 (d,  $J = 6.8$  Hz, C), 147.9 (d,  $J = 1.9$  Hz, C), 149.4 (d,  $J = 2.9$  Hz, C);  $^{31}\text{P}$   $\{^1\text{H}\}$  NMR (162 MHz,  $\text{CDCl}_3$ )  $\delta = 30.5$  (P=O); HRMS (FAB)  $m/z$  found: 483.1459 ( $[\text{M}+\text{H}]^+$ ), calcd for  $\text{C}_{27}\text{H}_{33}^{79}\text{BrOP}$  483.1452.

### Synthesis of (2-bromo-3,5-di-*tert*-butylphenyl)methyldiphenylphosphine (3').

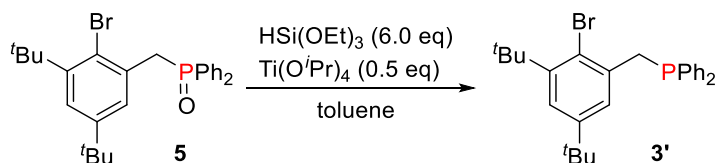

To a solution of **5** (500 mg, 1.03 mmol) in toluene (10 mL) was added triethoxysilane (1.14 mL, 6.21 mmol) and titanium(IV) tetraisopropoxide (0.15 mL, 0.52 mmol). After the reaction mixture was stirred at reflux for 1 h, the volatiles were removed under reduce pressure. The residue was chromatographed on silica gel with hexane/benzene = 5/1 ( $R_f = 0.60$ ) in a glovebox under an argon atmosphere to give **3'** as a colorless solid (461 mg, 0.99 mmol, 95%).

Mp. 84.5-85.3 °C.  $^1\text{H}$  NMR (400 MHz,  $\text{CDCl}_3$ )  $\delta = 1.05$  (s, 9H, *t*Bu), 1.55 (s, 9H, *t*Bu), 3.65 (s, 2H,  $\text{CH}_2$ ), 6.44 (dd,  $J = 2.3, 2.3$  Hz, 1H, aromH), 7.26 (dd,  $J = 2.1, 2.1$  Hz, 1H, aromH), 7.31-7.34 (m, 6H, Ph), 7.39-7.44 (m, 4H, Ph);  $^{13}\text{C}$   $\{^1\text{H}\}$  NMR (100 MHz,  $\text{CDCl}_3$ )  $\delta = 30.4$  ( $\text{CH}_3$ ), 31.1 ( $\text{CH}_3$ ), 34.5 (C), 37.6 (C), 38.8 (d,  $J = 16.4$  Hz,  $\text{CH}_2$ ), 122.5 (d,  $J = 4.8$  Hz, C), 123.4 (d,  $J = 1.9$  Hz, CH), 126.7 (d,  $J = 5.8$  Hz, CH), 128.5 (d,  $J = 5.8$  Hz, CH), 128.8 (CH), 133.3 (d,  $J = 18.3$  Hz, CH), 137.9 (d,  $J = 5.8$  Hz, C), 138.5 (d,  $J = 16.4$  Hz, C), 147.8 (d,  $J = 2.0$  Hz, C), 148.7 (d,  $J = 1.9$  Hz, C);  $^{31}\text{P}$   $\{^1\text{H}\}$  NMR (162 MHz,  $\text{CDCl}_3$ )  $\delta =$

-13.2 (PPh<sub>2</sub>); HRMS (FAB) *m/z* found: 466.1420 ([M]<sup>+</sup>), calcd for C<sub>27</sub>H<sub>32</sub><sup>79</sup>BrP 466.1425.

### Synthesis of (2-bromo-3,5-di-*tert*-butylphenyl)methyldiphenylphosphine-borane (**3**).

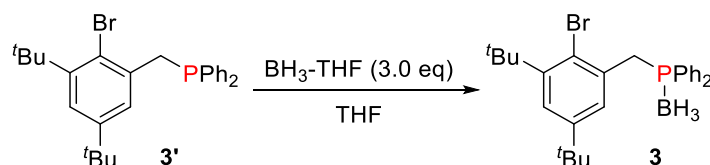

To a solution of **3'** (200 mg, 0.427 mmol) in THF (6 mL) was added dropwise borane–tetrahydrofuran complex (1.03 M in THF; 1.90 mL, 1.96 mmol) at 0 °C. After the reaction mixture was stirred at room temperature for 2 h, the volatiles were removed under reduce pressure. The residue was chromatographed on silica gel with hexane/AcOEt = 10/1 (*R<sub>f</sub>* = 0.50) to give **3** as a colorless solid (165 mg, 0.343 mmol, 80%).

Mp. 137-138 °C. <sup>1</sup>H NMR (400 MHz, CDCl<sub>3</sub>) δ = 0.6-1.4 (br, 3H, BH<sub>3</sub>), 1.20 (s, 9H, <sup>t</sup>Bu), 1.40 (s, 9H, <sup>t</sup>Bu), 3.99 (d, *J* = 11.5 Hz, 2H, CH<sub>2</sub>), 7.14 (dd, *J* = 2.3, 2.3 Hz, 1H, aromH), 7.32 (dd, *J* = 2.0, 2.0 Hz, 1H, aromH), 7.35-7.40 (m, 4H, Ph), 7.44-7.49 (m, 2H, Ph), 7.55-7.61 (m, 4H, Ph); <sup>13</sup>C {<sup>1</sup>H} NMR (100 MHz, CDCl<sub>3</sub>) δ = 30.2 (CH<sub>3</sub>), 31.2 (CH<sub>3</sub>), 34.7 (C), 35.3 (d, *J* = 31.8 Hz, CH<sub>2</sub>), 37.5 (C), 123.4 (d, *J* = 5.8 Hz, C), 124.3 (d, *J* = 1.9 Hz, CH), 127.3 (d, *J* = 3.9 Hz, CH), 128.3 (d, *J* = 53.9 Hz, C), 128.6 (d, *J* = 9.6 Hz, CH), 131.3 (d, *J* = 1.9 Hz, CH), 133.1 (d, *J* = 8.7 Hz, CH), 133.5 (d, *J* = 4.8 Hz, C), 147.8 (d, *J* = 2.0 Hz, C), 149.3 (d, *J* = 1.9 Hz, C); <sup>31</sup>P {<sup>1</sup>H} NMR (162 MHz, CDCl<sub>3</sub>) δ = 19.3 (br d, *J* = 43.6 Hz, PBH<sub>3</sub>). <sup>11</sup>B {<sup>1</sup>H} NMR (129 MHz, CDCl<sub>3</sub>) δ = -39.1 (br d, *J* = 34.4 Hz); HRMS (FAB) *m/z* found: 481.1833 ([M+H]<sup>+</sup>), calcd for C<sub>27</sub>H<sub>36</sub>B<sup>79</sup>BrP 481.1831.

### Synthesis of phosphineborane **3** from 2-bromo-1-bromomethyl-3,5-di-*tert*-butyl-benzene (**6**).

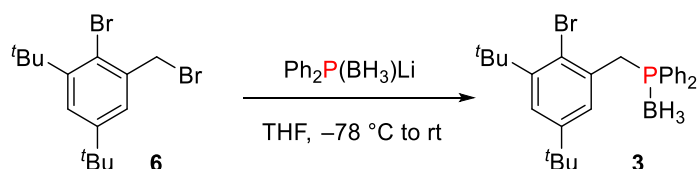

To a solution of Ph<sub>2</sub>PH·BH<sub>3</sub> (3.97 g, 19.8 mmol) in THF (40 mL) was added dropwise <sup>n</sup>BuLi (1.6 M in hexane; 12.4 mL, 19.8 mmol) at -78 °C. After the reaction mixture was stirred at -78 °C for 20 min, a solution of **6** (7.54 g, 20.8 mmol) in THF (8 mL) was added. The reaction mixture was gradually warmed to room temperature, and then stirred for 1 h. The reaction was quenched with sat. NH<sub>4</sub>Cl aq. The organic layer was separated, and then the aqueous layer was extracted with ethyl acetate. The combined organic layer was dried over MgSO<sub>4</sub>, filtered through a pad of Celite, and then evaporated under reduced pressure. The residue was washed with hexane to give **3** as a colorless solid (7.35 g, 15.3 mmol, 77%).

### Synthesis of (3,5-di-*tert*-butyl-2-dichlorophosphinophenyl)methyldiphenylphosphine-borane (**2**).

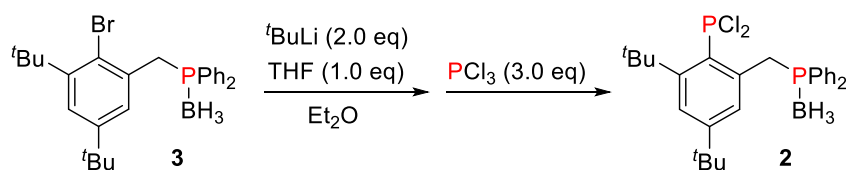

To a solution of **3** (1.00 g, 2.08 mmol) and THF (168  $\mu$ L, 2.08 mmol) in Et<sub>2</sub>O (40 mL) was added dropwise <sup>t</sup>BuLi (1.55 M in pentane; 2.68 mL, 4.16 mmol) at  $-105$  °C. After the reaction mixture was stirred at  $-105$  °C for 15 min, PCl<sub>3</sub> (0.91 mL, 10.4 mmol) was added. The reaction mixture was gradually warmed to room temperature, and then stirred for 2 h. The volatiles were removed under reduced pressure. The precipitate was filtered off by passing through a pad of Celite under a nitrogen atmosphere. The volatiles of the filtrate were removed under reduced pressure. The residue was washed with hexane to give **2** (429 mg, 0.85 mmol, 41%) as a pale yellow solid.

Mp. 101 °C (decomp.). <sup>1</sup>H NMR (400 MHz, CDCl<sub>3</sub>)  $\delta$  = 1.12 (s, 9H, <sup>t</sup>Bu), 1.52 (d,  $J$  = 1.6 Hz, 9H, <sup>t</sup>Bu), 4.51 (d,  $J$  = 11.7 Hz, 2H, CH<sub>2</sub>), 7.32 (d,  $J$  = 6.7 Hz, 1H, aromH), 7.36-7.41 (m, 5H, aromH and Ph), 7.43-7.48 (m, 2H, Ph), 7.57-7.62 (m, 4H, Ph); The BH<sub>3</sub> signal could not be assigned likely due to the line-broadening around 1 ppm; <sup>13</sup>C {<sup>1</sup>H} NMR (100 MHz, CDCl<sub>3</sub>)  $\delta$  = 30.8 (CH<sub>3</sub>), 32.4 (dd,  $J$  = 33.7, 3.9 Hz, CH<sub>2</sub>), 34.2 (d,  $J$  = 22.2 Hz, CH<sub>3</sub>), 35.3 (C), 37.6 (d,  $J$  = 3.9 Hz, C), 122.0 (d,  $J$  = 8.7 Hz, CH), 128.5 (d,  $J$  = 6.8 Hz, CH), 128.8 (d,  $J$  = 10.6 Hz, CH), 129.3 (d,  $J$  = 54.9 Hz, C), 131.3 (d,  $J$  = 1.9 Hz, CH), 133.0 (d,  $J$  = 8.7 Hz, CH), 133.2 (dd,  $J$  = 85.7, 5.8 Hz, C), 140.9 (dd,  $J$  = 3.8, 2.9 Hz, C), 155.3 (C), 156.0 (d,  $J$  = 36.6 Hz, C); <sup>31</sup>P {<sup>1</sup>H} NMR (162 MHz, CDCl<sub>3</sub>)  $\delta$  = 20.7 (br d,  $J$  = 47.9 Hz, PBH<sub>3</sub>), 159.4 (PCl<sub>2</sub>); <sup>11</sup>B {<sup>1</sup>H} NMR (129 MHz, CDCl<sub>3</sub>)  $\delta$  =  $-38.2$  (br); HRMS (FAB)  $m/z$  found: 503.1757 ([M+H]<sup>+</sup>), calcd for C<sub>27</sub>H<sub>36</sub>BCl<sub>2</sub>P<sub>2</sub> 503.1762.

### Synthesis of diphosphene-phosphineborane ligand **1**.

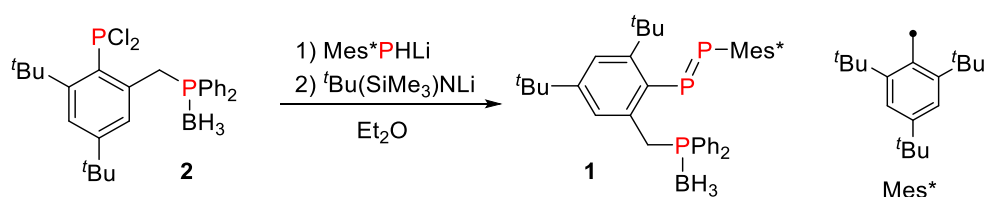

To a solution of Mes\*PH<sub>2</sub> (96.7 mg, 0.347 mmol) in Et<sub>2</sub>O (3 mL) was added <sup>t</sup>BuLi (1.55 M in hexane; 231  $\mu$ L, 0.365 mmol) dropwise at room temperature in a glovebox filled with argon. After stirring for 30 min, the mixture was added to **2** (174.7 mg, 0.347 mmol) in Et<sub>2</sub>O (30 mL) dropwise. After the mixture was stirred for 1.5 h, <sup>t</sup>Bu(Me<sub>3</sub>Si)NLi in a Et<sub>2</sub>O solution was added dropwise, which was prepared by the reaction of <sup>t</sup>Bu(Me<sub>3</sub>Si)NH (80.6  $\mu$ L, 420  $\mu$ mol) with *n*-BuLi (1.55 M in hexane; 231  $\mu$ L, 365  $\mu$ mol) in a Et<sub>2</sub>O solution (3 mL) at room temperature for 2 h. After the reaction mixture was stirred for 3.5 h, the volatiles were removed under reduced pressure to give an orange solid. The residue was filtered through a pad of Celite with hexane, and then the solvent of the filtrate was removed under reduced pressure. The residue was chromatographed on silica gel with hexane/toluene = 5/1 ( $R_f$  = 0.10) to 2/1 ( $R_f$  = 0.20) under argon atmosphere to give **1** as an orange solid (74.4 mg, 0.109 mmol, 30%).

Mp. 137 °C (decomp.).  $^1\text{H}$  NMR (400 MHz,  $\text{CDCl}_3$ )  $\delta$  = 1.16 (s, 9H,  $^t\text{Bu}$ ), 1.34 (s, 9H,  $^t\text{Bu}$ ), 1.36 (s, 9H,  $^t\text{Bu}$ ), 1.37 (s, 18H,  $^t\text{Bu}$ ), 4.05 (d,  $J$  = 11.5 Hz, 2H,  $\text{CH}_2$ ), 7.11 (dd,  $J$  = 2.1, 2.1 Hz, 1H, aromH), 7.31-7.36 (m, 5H, aromH and Ph), 7.41 (s, 2H,  $\text{Mes}^*$ - $m$ -aromH), 7.41-7.45 (m, 2H, Ph), 7.48-7.54 (m, 4H, Ph); The  $\text{BH}_3$  signal could not be assigned likely due to the line-broadening around 1 ppm;  $^1\text{H}$  NMR (500 MHz,  $\text{CD}_2\text{Cl}_2$ )  $\delta$  = 1.16 (s, 9H,  $^t\text{Bu}$ ), 1.34 (s, 9H,  $^t\text{Bu}$ ), 1.360 (s, 9H,  $^t\text{Bu}$ ), 1.363 (s, 18H,  $^t\text{Bu}$ ), 4.04 (d,  $J$  = 11.5 Hz, 2H,  $\text{CH}_2$ ), 7.06 (dd,  $J$  = 1.8, 1.8 Hz, 1H, aromH), 7.35-7.39 (m, 4H, Ph), 7.41 (dd,  $J$  = 1.8, 1.8 Hz, 1H, aromH), 7.44 (s, 2H,  $\text{Mes}^*$ - $m$ -aromH), 7.45-7.53 (m, 6H, Ph); The  $\text{BH}_3$  signal could not be assigned likely due to the line-broadening around 1 ppm;  $^{13}\text{C}$   $\{^1\text{H}\}$  NMR (100 MHz,  $\text{CDCl}_3$ )  $\delta$  = 31.1 ( $\text{CH}_3$ ), 31.5 ( $\text{CH}_3$ ), 33.1 (br,  $\text{CH}_3$ ), 34.1 (br,  $\text{CH}_3$ ), 34.7 (C), 35.0 (C), 36.4 (d,  $J$  = 29.9 Hz,  $\text{CH}_2$ ), 38.0 (C), 38.8 (C), 122.5 (CH), 123.0 (d,  $J$  = 2.0 Hz, CH), 126.3 (d,  $J$  = 5.7 Hz, CH), 128.7 (d,  $J$  = 9.6 Hz, CH), 128.8 (d,  $J$  = 53.2 Hz, C), 131.2 (d,  $J$  = 1.9 Hz, CH), 133.1 (d,  $J$  = 9.6 Hz, CH), 134.6 (br, C), 137.6 (dd,  $J$  = 67, 12 Hz, C),<sup>\*1)</sup> 139.5 (d,  $J$  = 61 Hz, C),<sup>\*1)</sup> 149.8 (C), 150.6 (C), 153.7 (d,  $J$  = 4.8 Hz, C), 154.0 (C);  $^{31}\text{P}$   $\{^1\text{H}\}$  NMR (162 MHz,  $\text{CDCl}_3$ )  $\delta$  = 528.9 (d,  $^1J_{\text{PP}}$  = 579 Hz, P=PAr), 479.2 (d,  $^1J_{\text{PP}}$  = 579 Hz, P=PAr), 21.1 (br,  $\text{PBH}_3$ );  $^{11}\text{B}$   $\{^1\text{H}\}$  NMR (129 MHz,  $\text{CDCl}_3$ )  $\delta$  = -35.9 (br). HRMS (ESI)  $m/z$  found: 709.4396 ( $[\text{M}+\text{H}]^+$ ), calcd for  $\text{C}_{45}\text{H}_{65}\text{BP}_3$  709.4392. IR (KBr)  $\nu_{\text{max}}/\text{cm}^{-1}$  2965, 2401 (BH), 2368 (BH), 1596, 1361, 1237, 1060.

\*1) The signals were tentatively assigned due to their low intensities.

### Synthesis of diphosphene–rhodium complex 7.

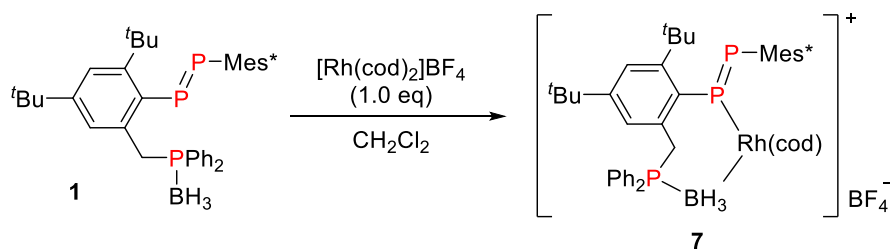

To a solution of  $[\text{Rh}(\text{cod})_2]\text{BF}_4$  (40.5 mg, 99.7  $\mu\text{mol}$ ) in  $\text{CH}_2\text{Cl}_2$  (2.5 mL) was added dropwise a solution of diphosphene–phosphineborane ligand **1** (74.4 mg, 105  $\mu\text{mol}$ ) in  $\text{CH}_2\text{Cl}_2$  (2.5 mL). After stirring at room temperature for 1.5 h, the reaction mixture was filtered through a pad of Celite to remove a black precipitate. The solvent of the filtrate was removed under reduce pressuere. The residue was washed with hexane and then reprecipitated with  $\text{CH}_2\text{Cl}_2$ /hexane to give **7** as red crystals (84.5 mg, 83.9  $\mu\text{mol}$ , 80%).

Mp. 151 °C (decomp.).  $^1\text{H}$  NMR (500 MHz,  $\text{CD}_2\text{Cl}_2$ )  $\delta$  = -0.56 (br, d,  $J$  = 105 Hz, 3H,  $\text{BH}_3$ ), 0.99 (s, 9H,  $^t\text{Bu}$ ), 1.38 (s, 9H,  $^t\text{Bu}$ ), 1.43 (s, 9H,  $^t\text{Bu}$ ), 1.54 (s, 9H,  $^t\text{Bu}$ ), 1.66-1.74 (m, 1H, cod), 1.82 (s, 9H,  $^t\text{Bu}$ ), 1.85-1.97 (m, 2H, cod), 2.10-2.15 (m, 2H, cod), 2.15-2.20 (m, 1H, cod), 2.29 (dd,  $J$  = 15.1, 6.9 Hz, 1H, cod), 2.58 (dtd,  $J$  = 16.0, 10.0, 6.9 Hz, 1H, cod), 2.80-2.84 (m, 1H, cod), 3.81-3.86 (m, 1H, cod), 3.97 (dd,  $J$  = 17.7, 14.0 Hz, 1H,  $\text{CH}_2$ ), 4.34 (dd,  $J$  = 14.0, 8.1 Hz, 1H,  $\text{CH}_2$ ), 4.86-4.91 (m, 1H, cod), 5.60 (dd,  $J$  = 7.8, 7.8 Hz, 1H, cod), 6.31 (dd,  $J$  = 1.9, 1.9 Hz, 1H, aromH), 7.02 (ddd,  $J$  = 12.0, 8.2, 1.3 Hz, 2H, Ph), 7.33 (ddd,  $J$  = 8.0, 8.0, 2.7 Hz, 2H, Ph), 7.40 (d,  $J$  = 1.6 Hz, 1H, aromH), 7.49-7.53 (m, 1H, Ph), 7.56 (d,  $J$  = 1.9 Hz, 2H, aromH), 7.68-7.71 (m, 2H, Ph), 7.75-7.79 (m, 3H, Ph);  $^{13}\text{C}$   $\{^1\text{H}\}$  NMR (126 MHz,  $\text{CD}_2\text{Cl}_2$ )  $\delta$  = 25.0 ( $\text{CH}_2$ ), 30.5 ( $\text{CH}_2$ ), 30.8 ( $\text{CH}_3$ ), 31.5 ( $\text{CH}_3$ ), 31.7 ( $\text{CH}_2$ ), 33.3 (d,  $J$  = 33.8 Hz,  $\text{CH}_2$ ), 34.0 (br,  $\text{CH}_3$ ), 34.5 (br,  $\text{CH}_3$ ), 34.6 ( $\text{CH}_3$ ), 34.8 (C), 35.3 (C), 37.8 ( $\text{CH}_2$ ), 38.8 ( $\times 2\text{C}$ ), 39.4 (C), 75.8 (CH), 75.9 (CH),

106.0 (CH), 109.5 (CH), 122.9 (CH), 123.9 (CH), 124.6 (d,  $J = 51.9$  Hz, C), 125.2 (d,  $J = 54.3$  Hz, C), 125.7 (br, CH), 128.0 (br, CH), 129.5 (d,  $J = 10.9$  Hz, CH), 130.1 (d,  $J = 9.6$  Hz, CH), 132.5 (d,  $J = 7.2$  Hz, CH), 133.3 (d,  $J = 9.7$  Hz, CH), 133.5 (CH), 133.9 (br, C), 153.5 (C), 153.9 (d,  $J = 3.6$  Hz, C), 155.5 (C), 156.1 (d,  $J = 10.8$  Hz, C), 156.3 (d,  $J = 10.8$  Hz, C). The  $^{13}\text{C}$  signals bound to the phosphorus atoms could not be assigned due to their low intensities;  $^{31}\text{P}$   $\{^1\text{H}\}$  NMR (162 MHz,  $\text{CD}_2\text{Cl}_2$ )  $\delta = 439.8$  (d,  $^1J_{\text{PP}} = 544$  Hz,  $^2J_{\text{PRh}} = 18$  Hz,  $\text{Mes}^*\text{P}=\text{P}$ ), 348.7 (dd,  $^1J_{\text{PP}} = 544$  Hz,  $^1J_{\text{PRh}} = 149$  Hz,  $\text{P}=\text{P}[\text{Rh}]\text{Ar}$ ), 4.6 (br q,  $J = 114$  Hz,  $\text{PBH}_3$ );  $^{11}\text{B}$   $\{^1\text{H}\}$  NMR (129 MHz,  $\text{CD}_2\text{Cl}_2$ )  $\delta = -3.1$  ( $\text{BF}_4$ ),  $-36.6$  (br,  $\text{BH}_3$ ); HRMS (ESI)  $m/z$  found: 919.4301 ( $[\text{M}-\text{BF}_4]^+$ ), calcd for  $\text{C}_{53}\text{H}_{76}\text{BP}_3\text{Rh}$  919.4308. IR (KBr)  $\nu_{\text{max}}/\text{cm}^{-1}$  2955, 2432 (B–H), 2075 (Rh–H), 2008 (Rh–H), 1594, 1438, 1058.

### Coupling reaction of benzimidazole (12) with cyclohexylallene (13).<sup>S7</sup>

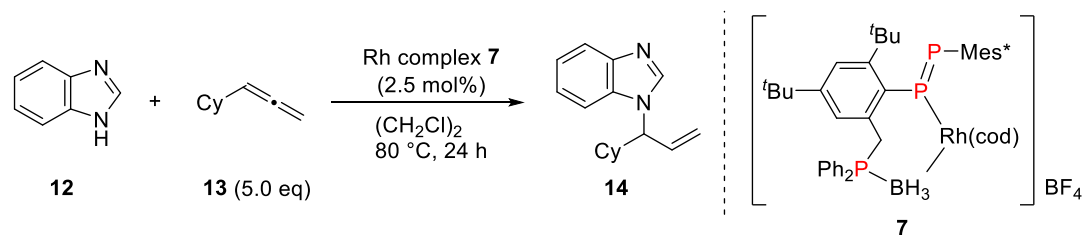

Diphosphene–rhodium complex 7 (2.0 mg, 2.0  $\mu\text{mol}$ ), benzimidazole (9.3 mg, 79  $\mu\text{mol}$ ), cyclohexylallene (58  $\mu\text{L}$ , 397  $\mu\text{mol}$ ), and 1,2-dichloroethane (0.32 mL) was successively charged in a 5 mL screw vial in a glovebox filled with argon and sealed. The reaction mixture was stirred at  $80\text{ }^\circ\text{C}$  for 24 h. After cooling to room temperature, the volatiles were removed under reduced pressure. The residue was purified by PTLC on silica gel to give 14 as a yellow oil (6.7 mg, 28  $\mu\text{mol}$ , 35%).

$^1\text{H}$  and  $^{13}\text{C}$  NMR spectral data are identical to those in the literature.<sup>S7</sup>  $^1\text{H}$  NMR (400 MHz,  $\text{CDCl}_3$ )  $\delta = 0.85\text{--}0.94$  (m, 1H, Cy), 0.99–1.10 (m, 1H, Cy), 1.10–1.21 (m, 2H, Cy), 1.22–1.31 (m, 1H, Cy), 1.31–1.39 (m, 1H, Cy), 1.62–1.69 (m, 2H, Cy), 1.78–1.84 (m, 1H, Cy), 1.90–2.05 (m, 2H, Cy), 4.50 (dd,  $J = 8.7, 7.5$  Hz, 1H,  $\text{NCHCy}$ ), 5.18 (d,  $J = 17.0$  Hz, 1H,  $\text{CH}=\text{CH}_2$ ), 5.28 (d,  $J = 10.3$  Hz, 1H,  $\text{CH}=\text{CH}_2$ ), 6.17 (ddd,  $J = 17.0, 10.3, 7.5$  Hz, 1H,  $\text{CH}=\text{CH}_2$ ), 7.25–7.30 (m, 2H, aromH), 7.38–7.43 (m, 1H, aromH), 7.79–7.84 (m, 1H, aromH), 7.92 (s, 1H, imidazoleH);  $^{13}\text{C}$   $\{^1\text{H}\}$  NMR (100 MHz,  $\text{CDCl}_3$ )  $\delta = 25.7$  ( $\text{CH}_2$ ), 25.8 ( $\text{CH}_2$ ), 26.1 ( $\text{CH}_2$ ), 29.7 ( $\text{CH}_2$ ), 30.4 ( $\text{CH}_2$ ), 41.3 (CH), 64.8 (CH), 110.6 (CH), 119.0 ( $\text{CH}_2$ ), 120.5 (CH), 122.1 (CH), 122.7 (CH), 133.6 (C), 134.6 (CH), 142.0 (CH), 143.9 (C).

### Synthesis of $[\text{Rh}(\text{tmeda})(\text{cod})]\text{BF}_4$ (tmeda = $N,N,N,N$ -tetramethylethylenediamine).<sup>S8</sup>

To a solution of  $[\text{Rh}(\text{cod})_2]\text{BF}_4$  (60.9 mg, 0.150 mmol) in  $\text{CH}_2\text{Cl}_2$  (1 mL) was added dropwise  $N,N,N,N$ -tetramethylethylenediamine (169 mg, 1.45 mmol). After stirring at room temperature for 15 min,  $\text{Et}_2\text{O}$  (5 mL) was added. The resulting precipitate was filtered and washed with  $\text{Et}_2\text{O}$  to give  $[\text{Rh}(\text{tmeda})(\text{cod})]\text{BF}_4$  as a yellow solid (60.3 mg, 0.146 mmol, 97%).

Mp.  $168\text{ }^\circ\text{C}$  (decomp).  $^1\text{H}$  NMR (500 MHz,  $\text{CD}_2\text{Cl}_2$ )  $\delta = 1.84\text{--}1.89$  (m, 4H, cod), 2.43–2.49 (m, 4H, cod), 2.55 (s, 12H,  $\text{NCH}_3$ ), 2.59 (s, 4H,  $\text{NCH}_2$ ), 3.95 (br s, 4H, cod);  $^{13}\text{C}$   $\{^1\text{H}\}$  NMR (126 MHz,  $\text{CD}_2\text{Cl}_2$ )  $\delta = 30.2$  ( $\text{CH}_2$ ), 49.2 ( $\text{CH}_3$ ), 61.1 ( $\text{CH}_2$ ), 83.9 (d,  $J = 13.3$  Hz, CH);  $^{19}\text{F}$  NMR (378 MHz,  $\text{CD}_2\text{Cl}_2$ )  $\delta = -152.4$ ;  $^{11}\text{B}$   $\{^1\text{H}\}$  NMR (129 MHz,  $\text{CD}_2\text{Cl}_2$ )  $\delta = -2.1$ . HRMS (ESI)  $m/z$  found: 327.1310 ( $[\text{M}-\text{BF}_4]^+$ ), calcd for

C<sub>14</sub>H<sub>28</sub>N<sub>2</sub>Rh 327.1308.

**Synthesis of [Rh(py)<sub>2</sub>(cod)]BF<sub>4</sub> (**15**, py = pyridine).<sup>S8</sup>**

To a solution of [Rh(cod)<sub>2</sub>]BF<sub>4</sub> (60.9 mg, 0.150 mmol) in CH<sub>2</sub>Cl<sub>2</sub> (1 mL) was added dropwise pyridine (236 mg, 2.98 mmol). After stirring at room temperature for 15 min, Et<sub>2</sub>O (5 mL) was added. The resulting precipitate was filtered and washed with Et<sub>2</sub>O to give **15** as a yellow solid (57.0 mg, 0.125 mmol, 83%).

Mp. 162 °C (decomp). <sup>1</sup>H NMR (500 MHz, CD<sub>2</sub>Cl<sub>2</sub>) δ = 1.99-2.08 (m, 4H, cod), 2.63-2.70 (m, 4H, cod), 4.18 (br s, 4H, cod), 7.40-7.43 (m, 4H, py), 7.77 (tt, *J* = 7.7, 1.7 Hz, 2H, py), 8.72-8.73 (m, 4H, py); <sup>13</sup>C {<sup>1</sup>H} NMR (126 MHz, CD<sub>2</sub>Cl<sub>2</sub>) δ = 30.9 (CH<sub>2</sub>), 85.7 (d, *J* = 12.1 Hz, CH), 126.5 (CH), 139.0 (CH), 150.6 (CH); <sup>19</sup>F NMR (378 MHz, CD<sub>2</sub>Cl<sub>2</sub>) δ = -152.6; <sup>11</sup>B {<sup>1</sup>H} NMR (129 MHz, CD<sub>2</sub>Cl<sub>2</sub>) δ = -1.9. HRMS (ESI) *m/z* found: 369.0838 ([M-BF<sub>4</sub>]<sup>+</sup>), calcd for C<sub>18</sub>H<sub>22</sub>N<sub>2</sub>Rh 369.0838.



## 2. Spectral Data

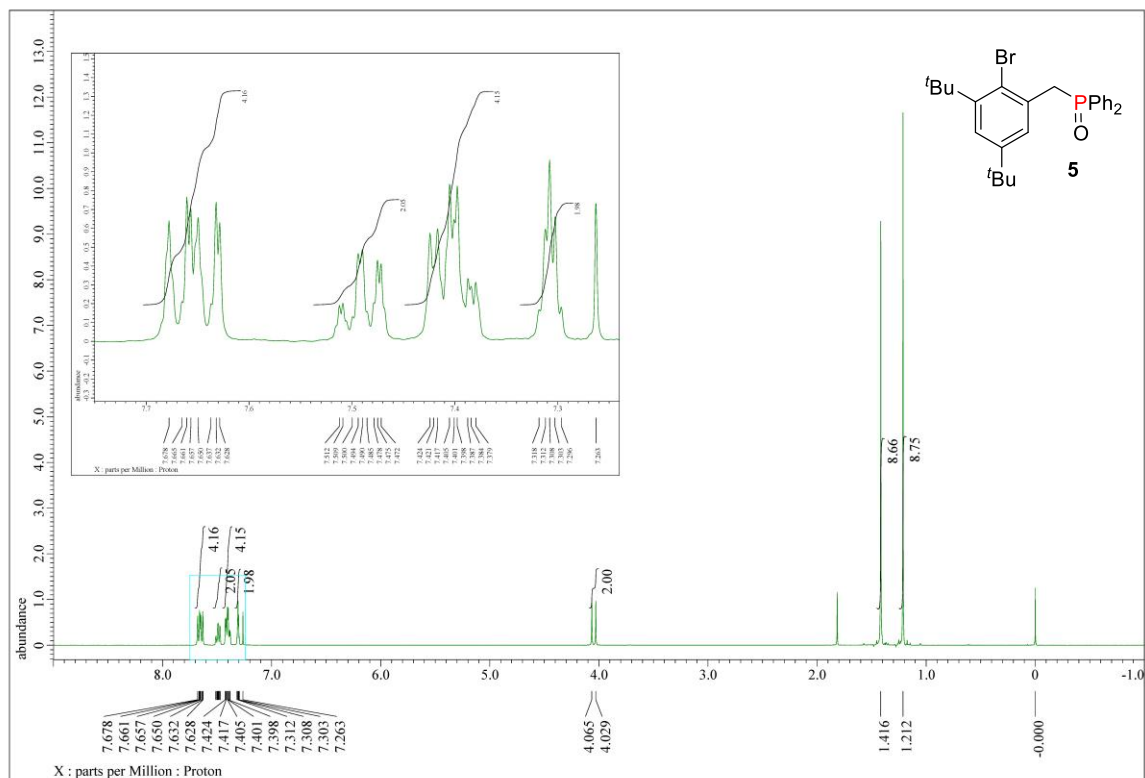

Fig. S1 <sup>1</sup>H NMR Spectrum of 5.

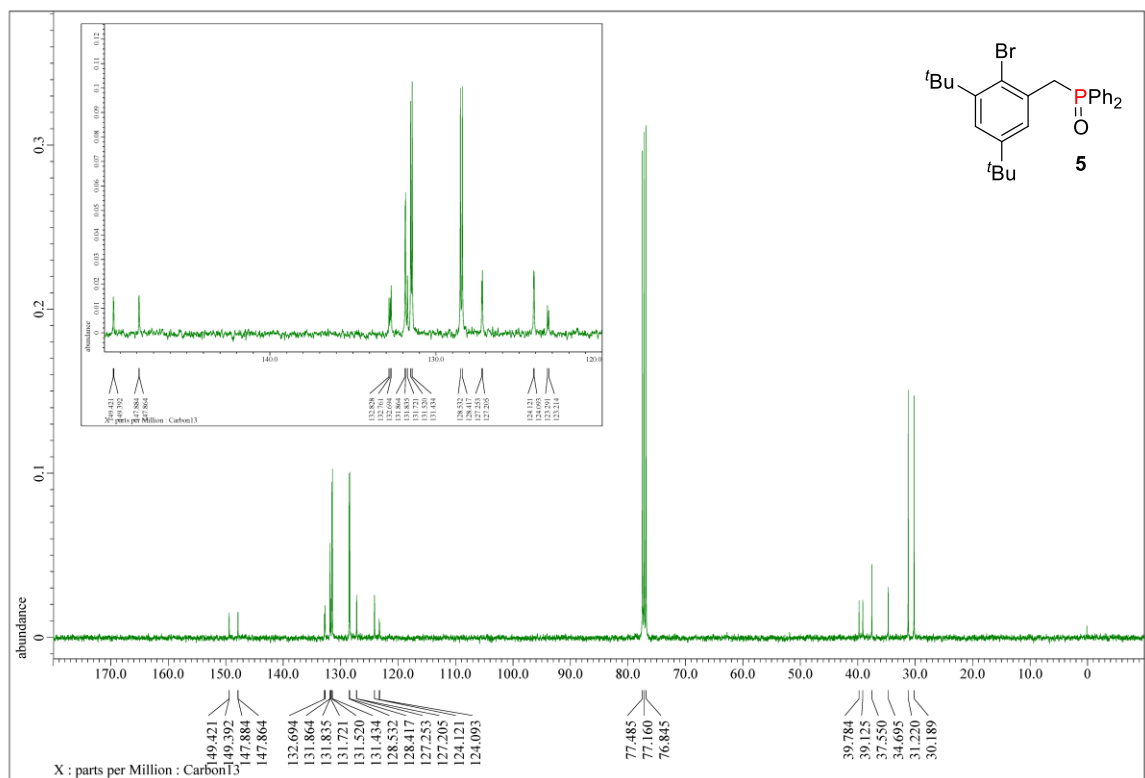

Fig. S2 <sup>13</sup>C NMR Spectrum of 5.

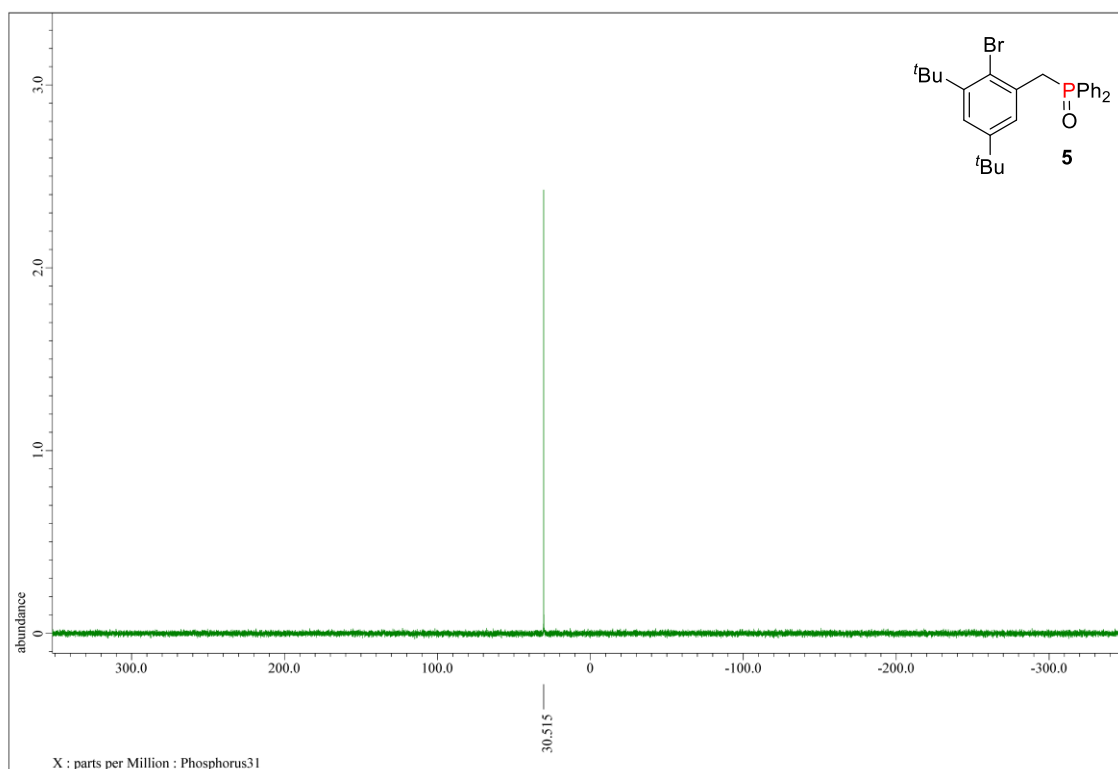

Fig. S3  $^{31}\text{P}$  NMR Spectrum of 5.

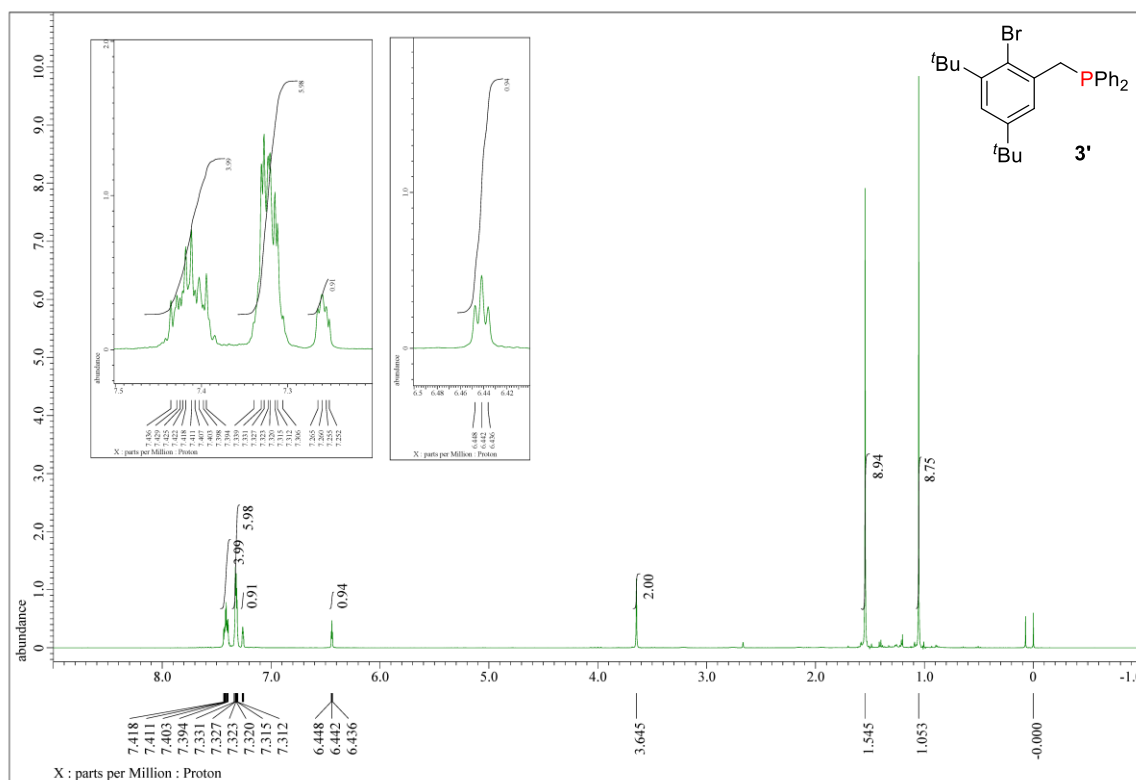

Fig. S4  $^1\text{H}$  NMR Spectrum of 3'.

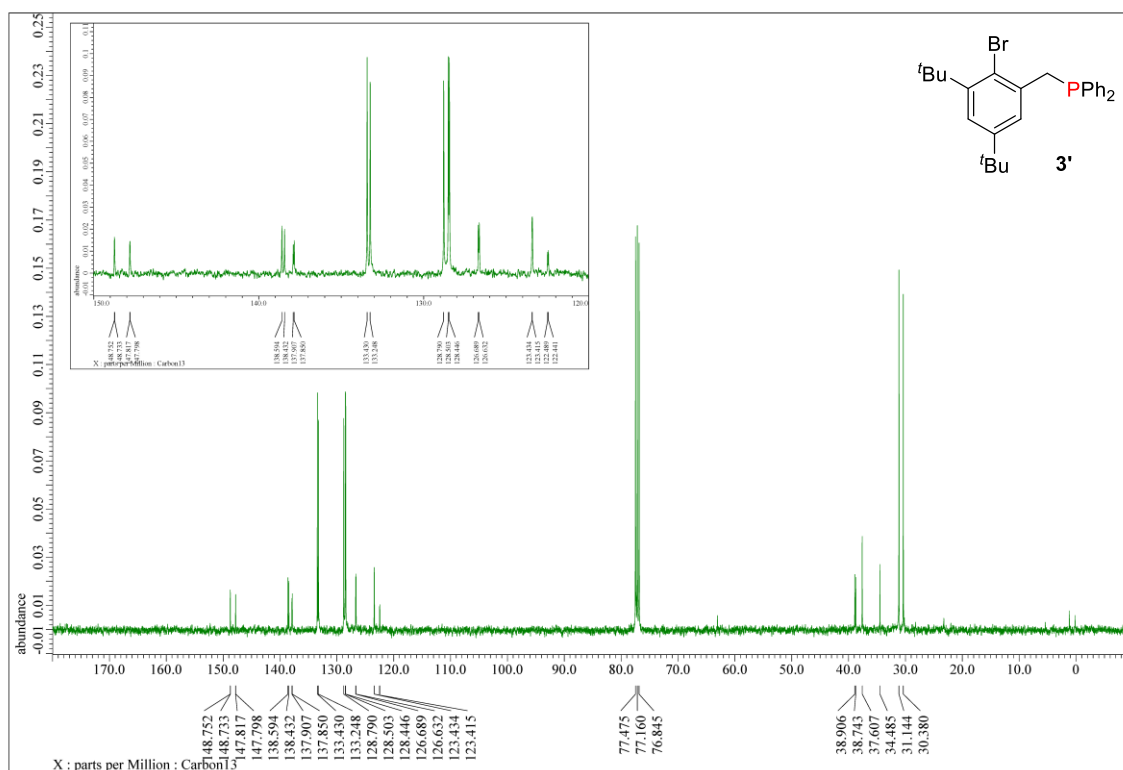

Fig. S5  $^{13}\text{C}$  NMR Spectrum of **3'**.

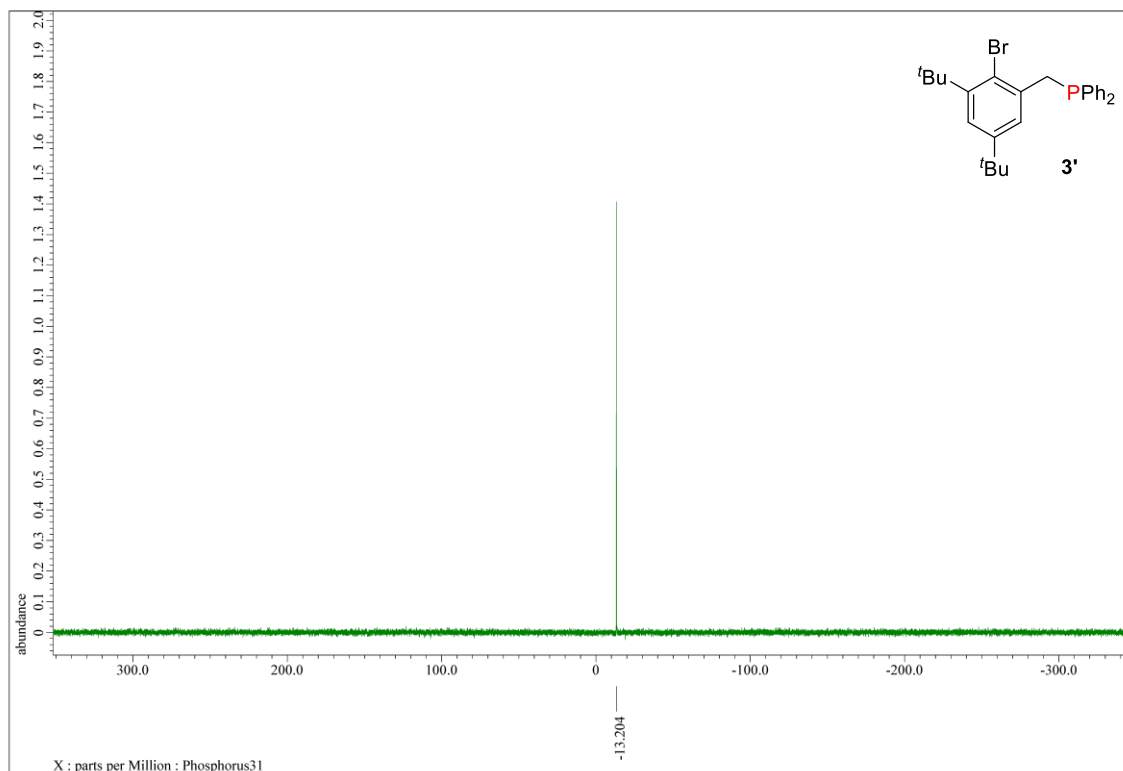

Fig. S6  $^{31}\text{P}$  NMR Spectrum of **3'**.

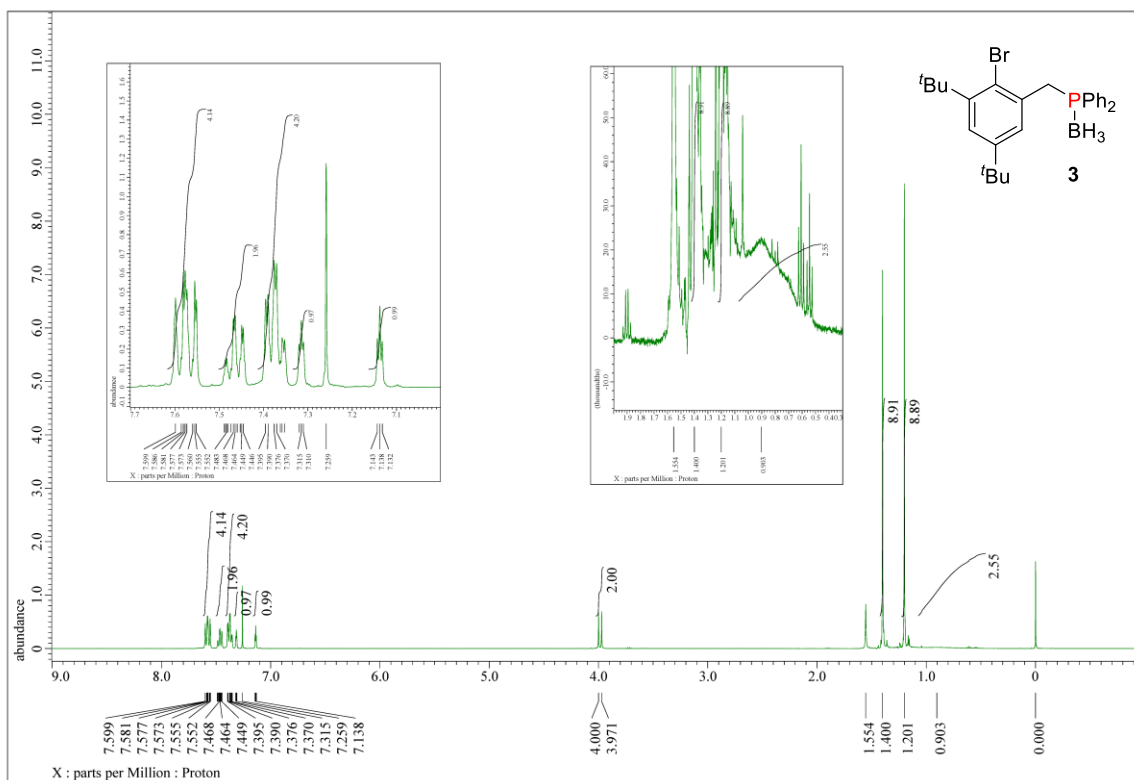

Fig. S7 <sup>1</sup>H NMR Spectrum of 3.

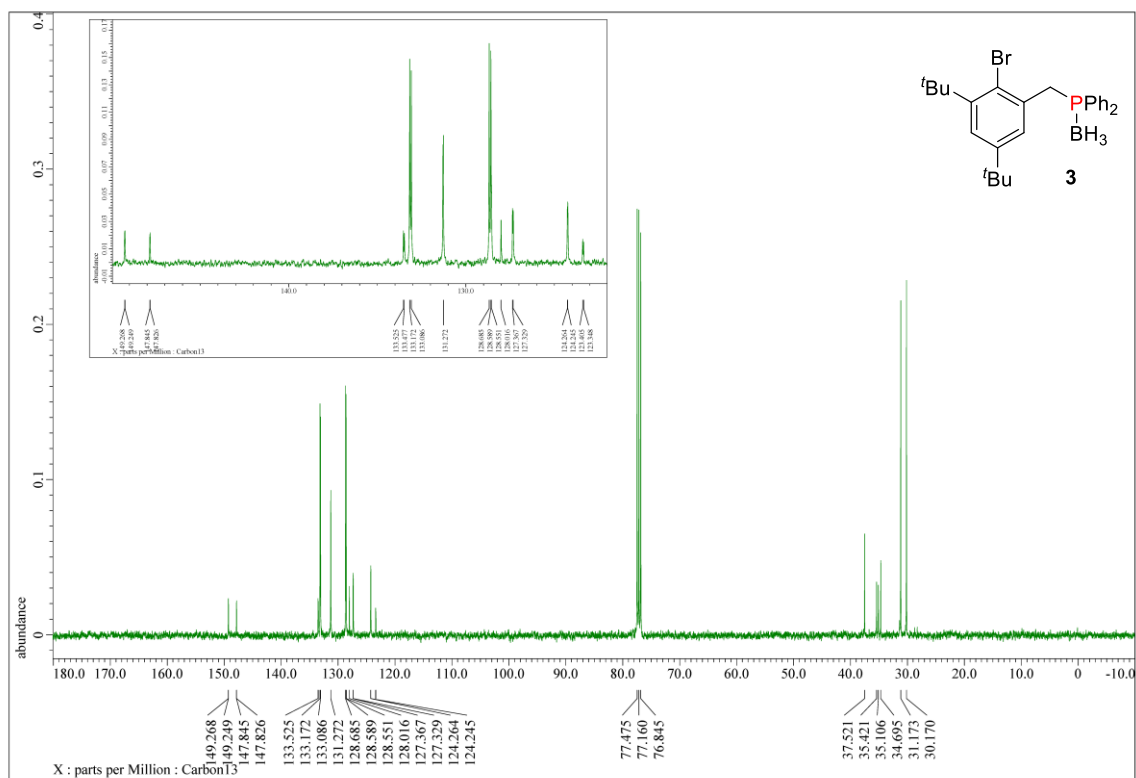

Fig. S8 <sup>13</sup>C NMR Spectrum of 3.

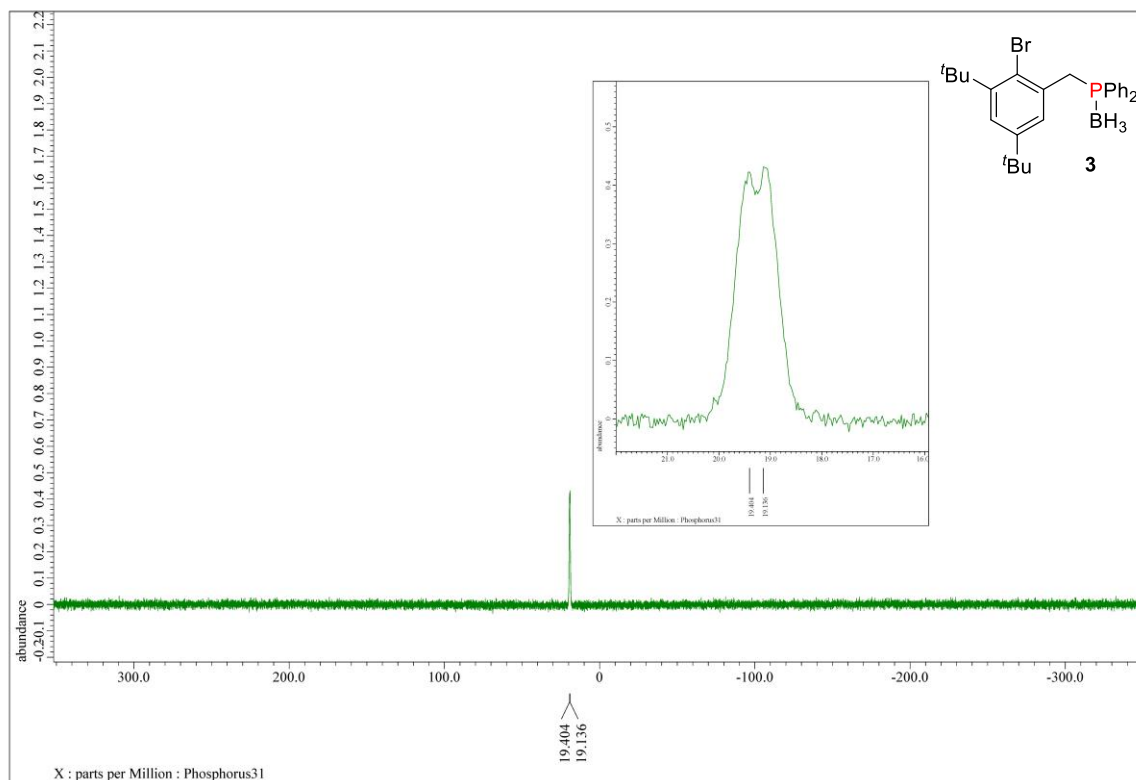

Fig. S9 <sup>31</sup>P NMR Spectrum of **3**.

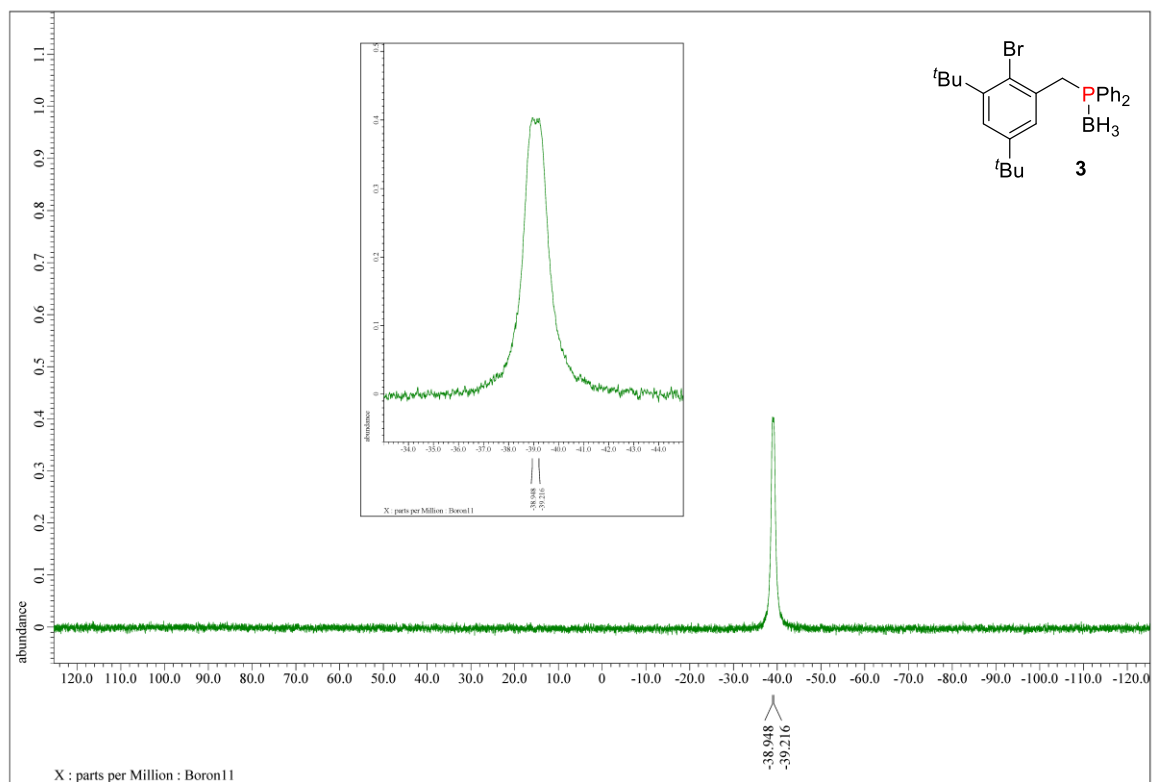

Fig. S10 <sup>11</sup>B NMR Spectrum of **3**.

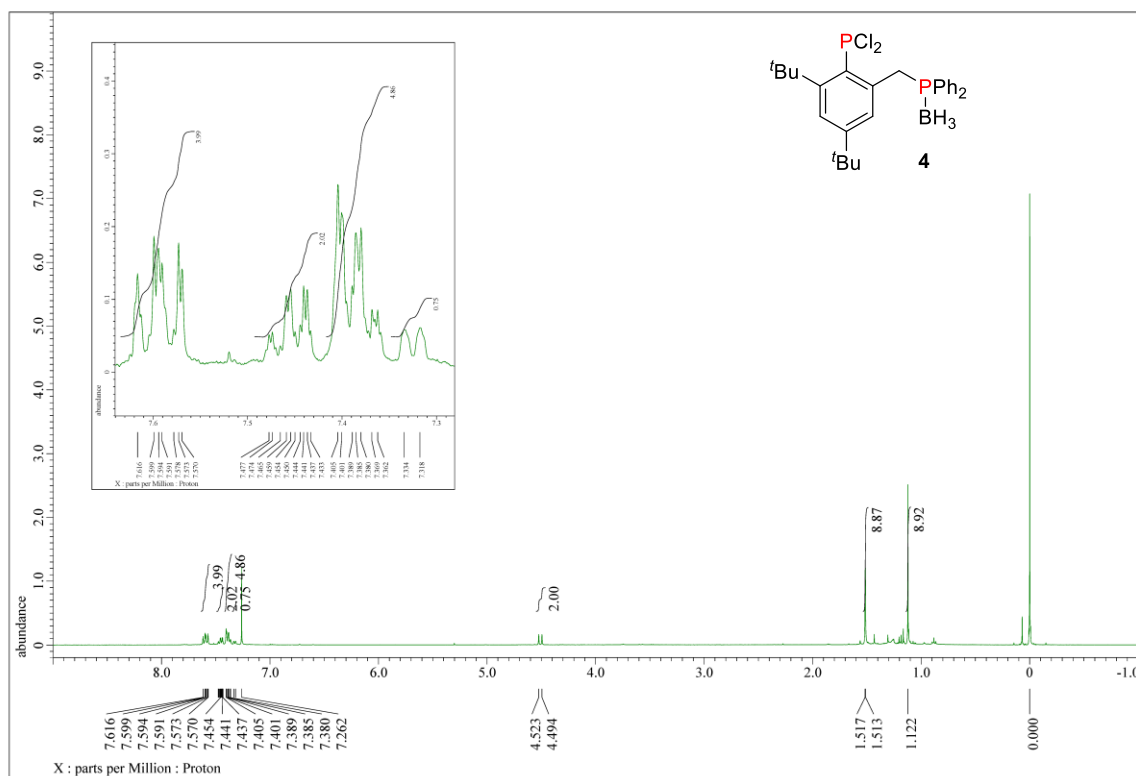

Fig. S11 <sup>1</sup>H NMR Spectrum of 4.

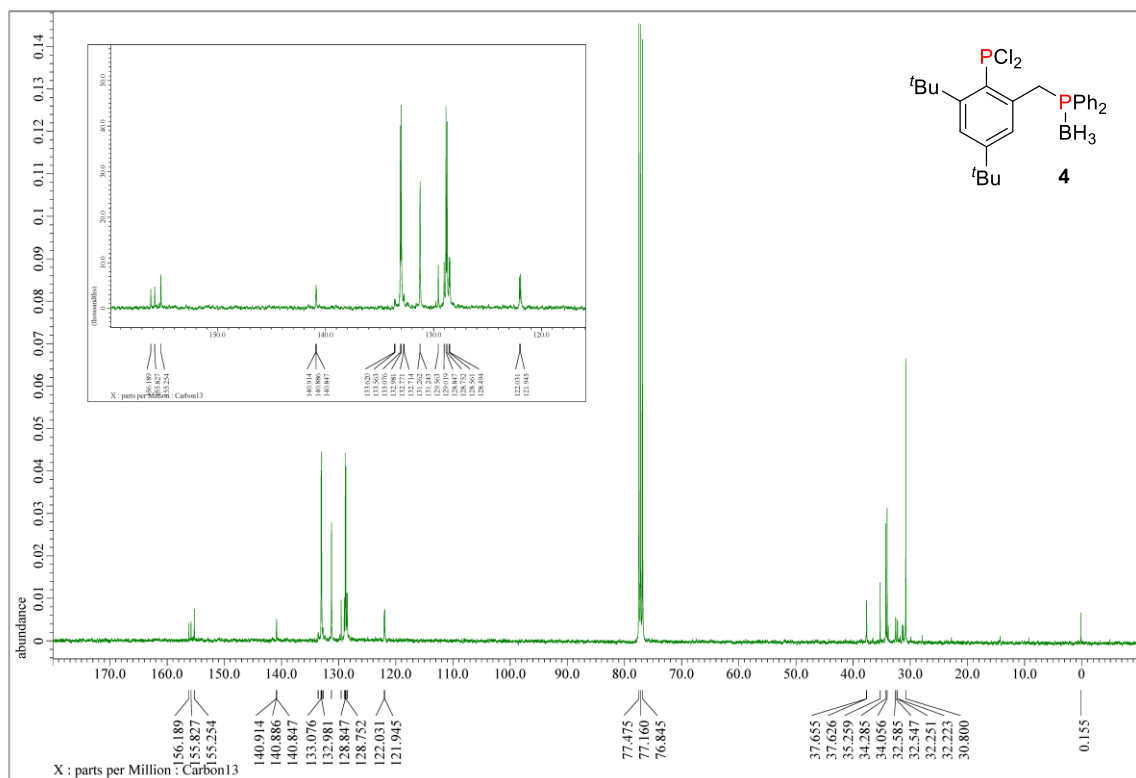

Fig. S12 <sup>13</sup>C NMR Spectrum of 4.

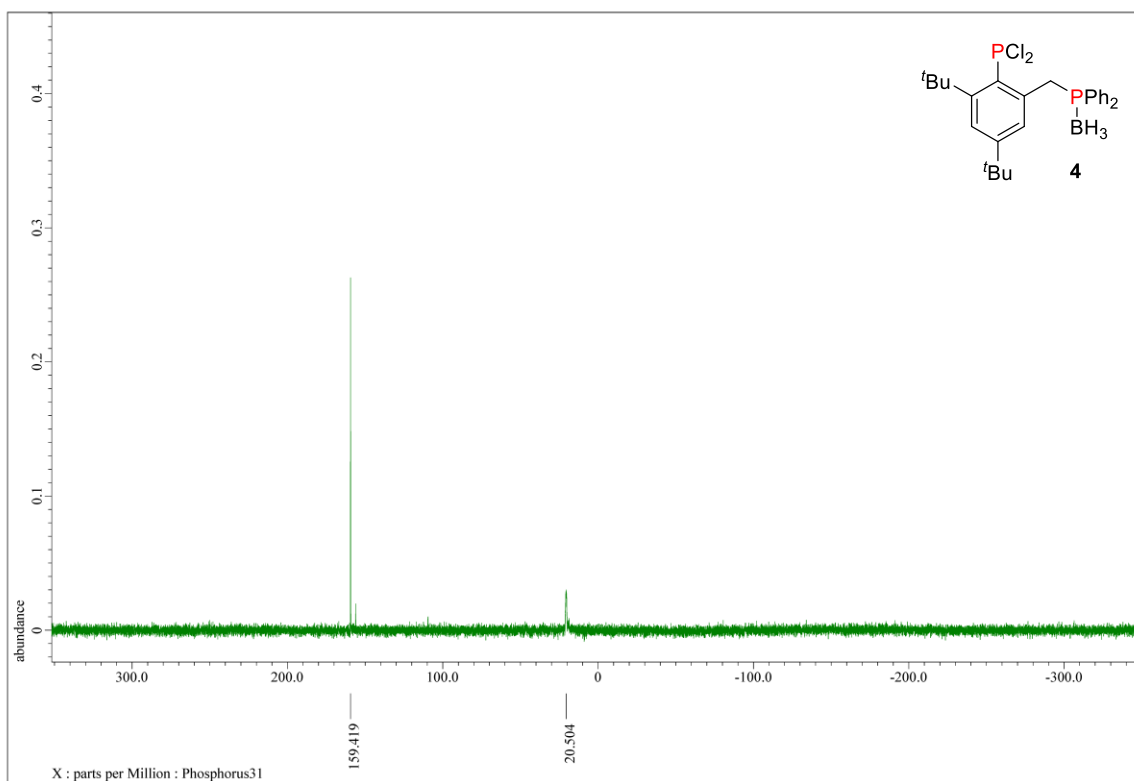

Fig. S13 <sup>31</sup>P NMR Spectrum of 4.

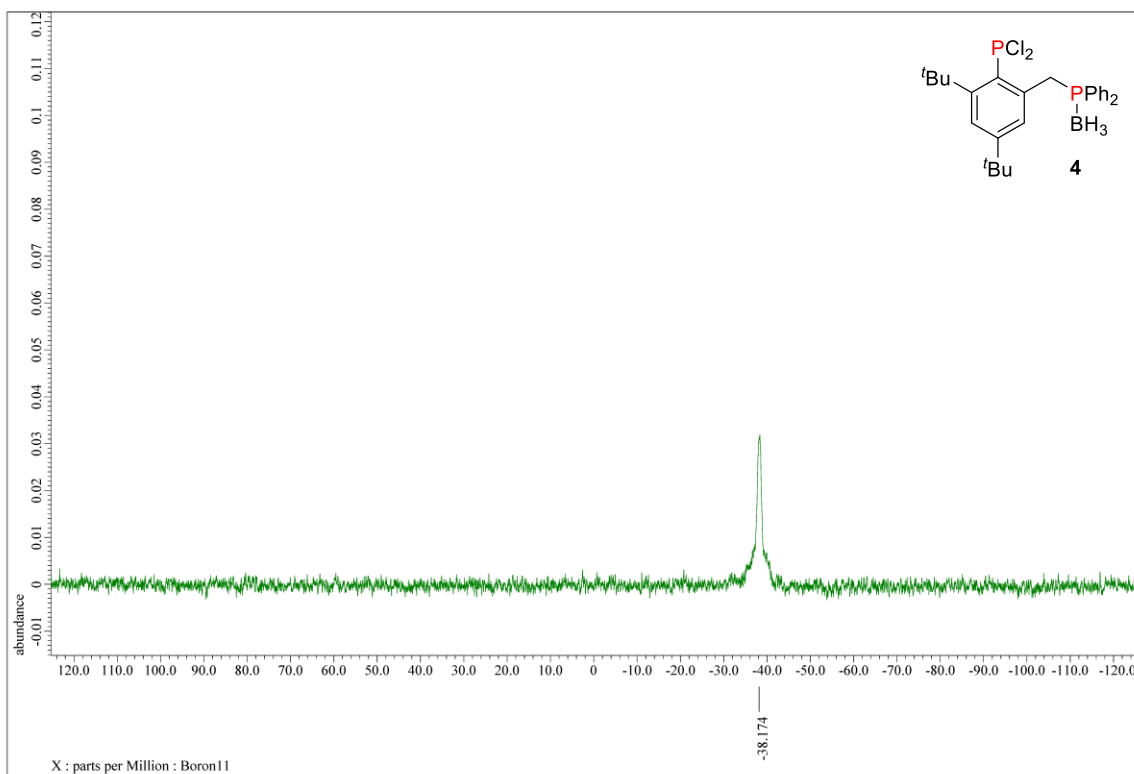

Fig. S14 <sup>11</sup>B NMR Spectrum of 4.

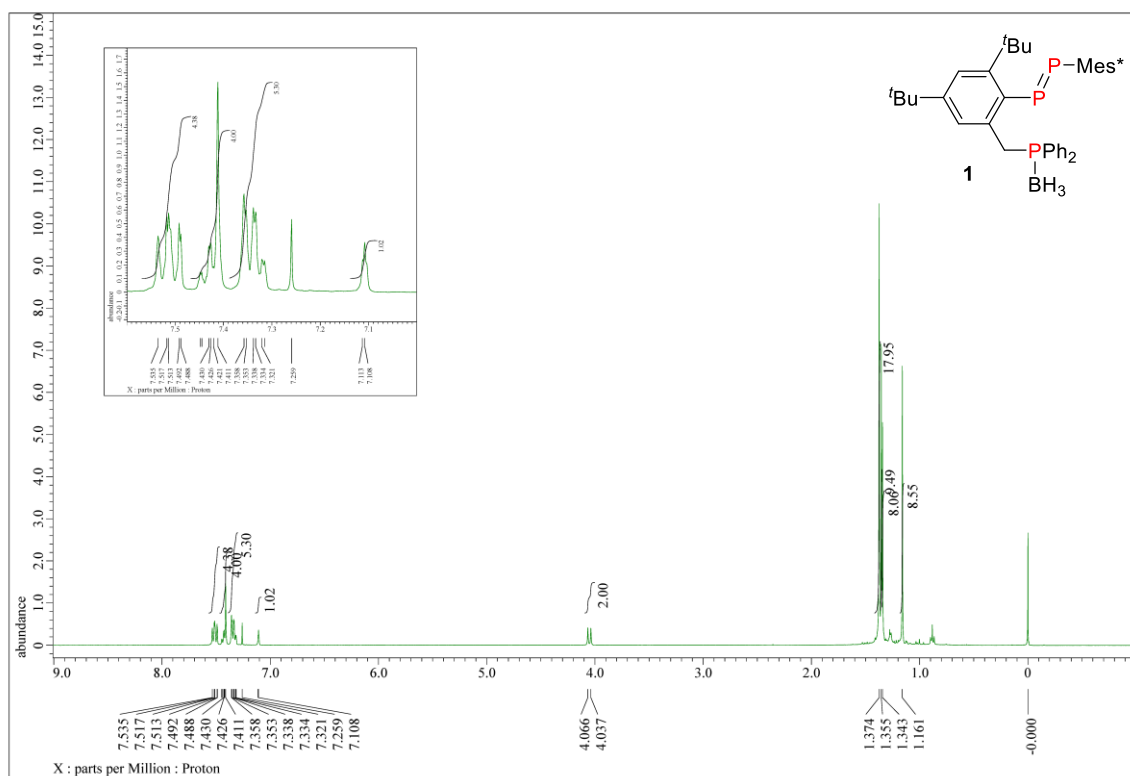

Fig. S15 <sup>1</sup>H NMR Spectrum of 1 in CDCl<sub>3</sub>.

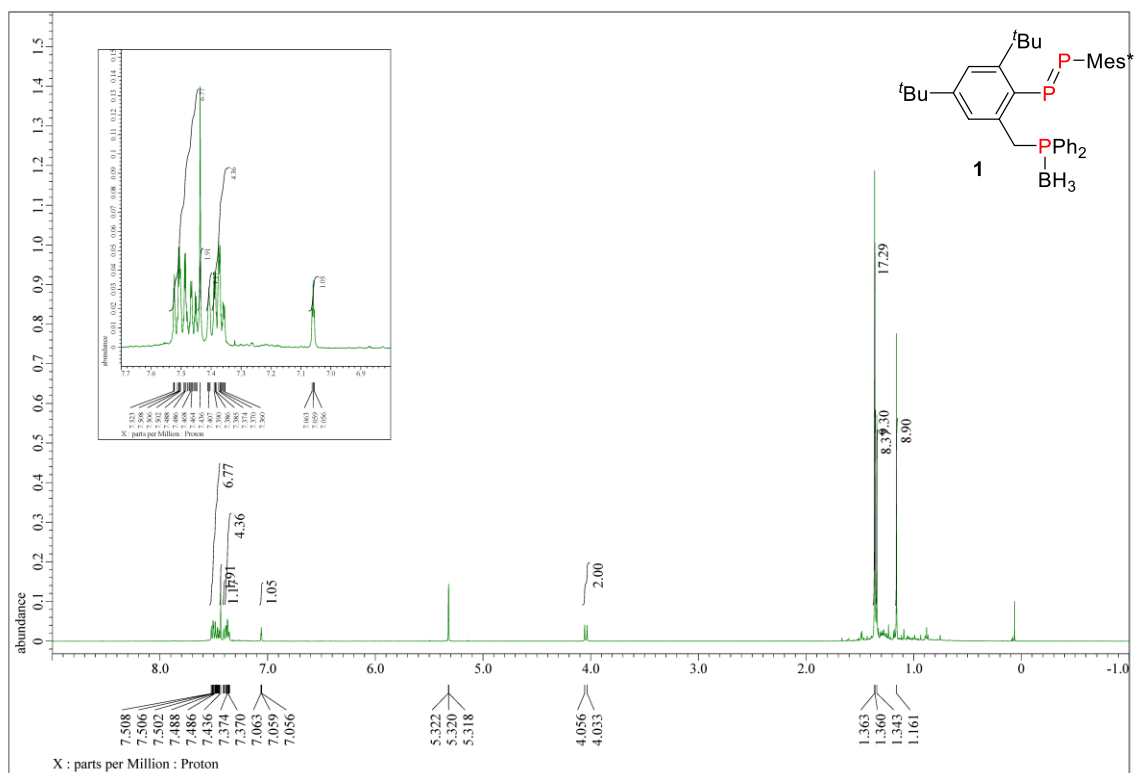

Fig. S16 <sup>1</sup>H NMR Spectrum of 1 in CD<sub>2</sub>Cl<sub>2</sub>.



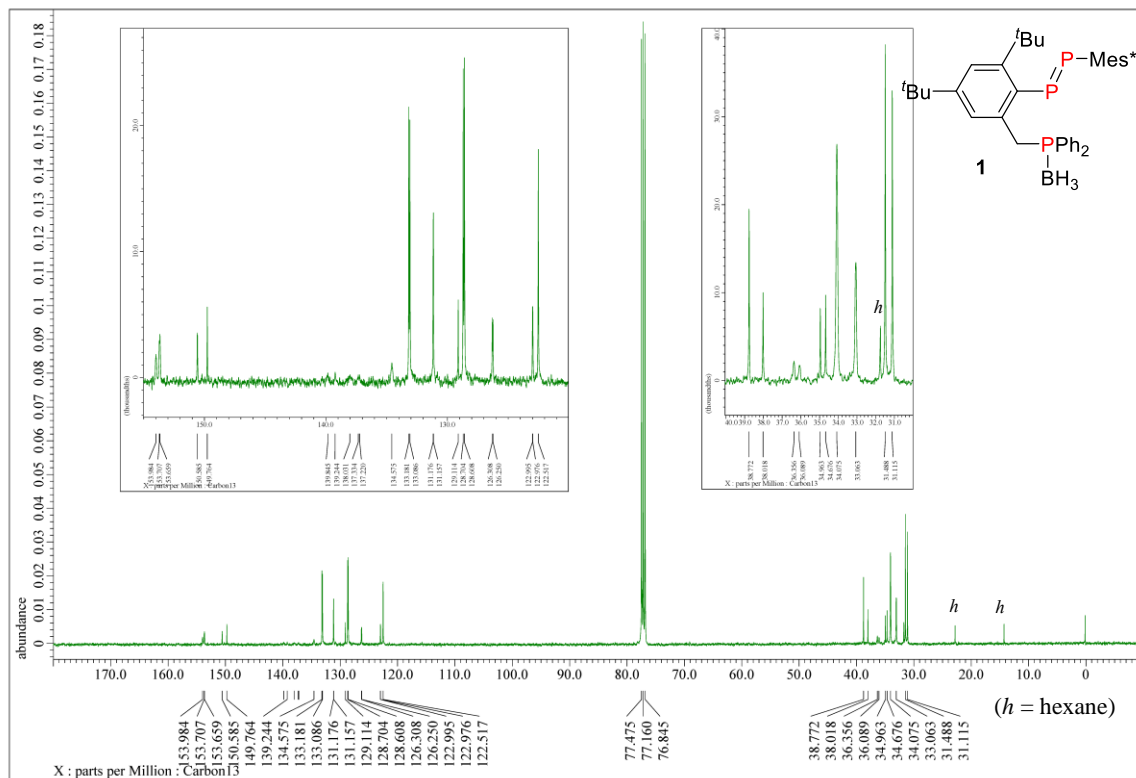

Fig. S17 <sup>13</sup>C NMR Spectrum of **1**.

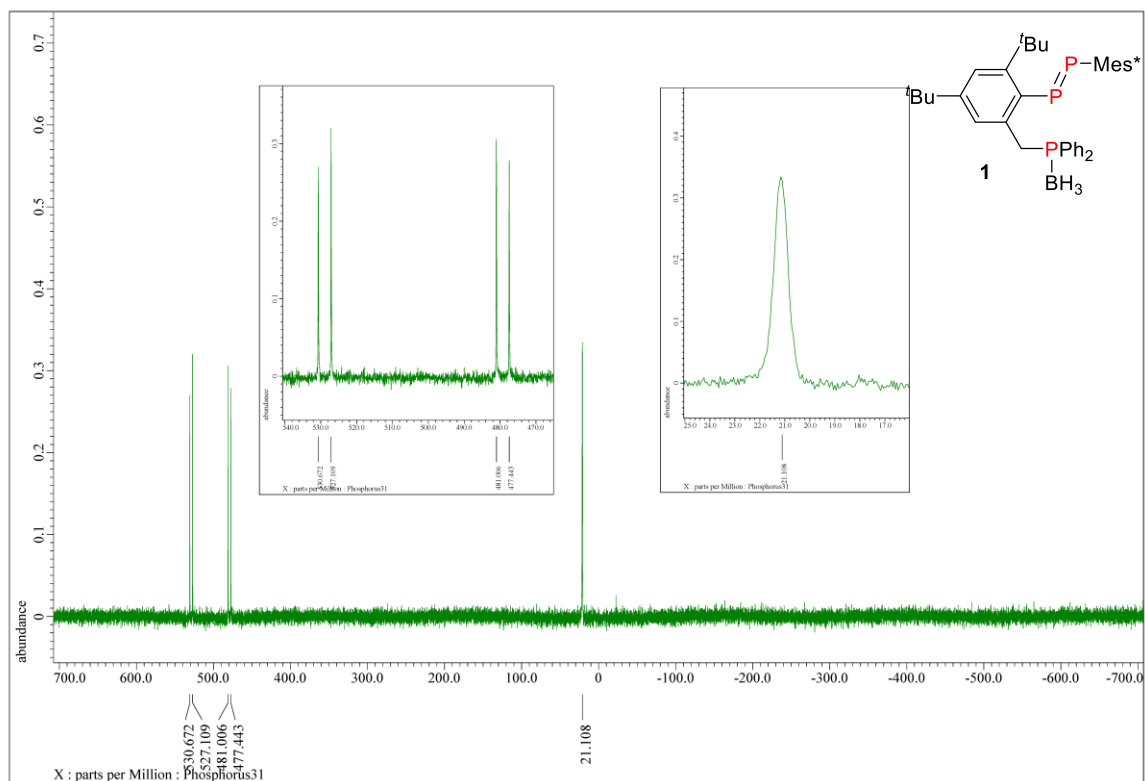

Fig. S18 <sup>31</sup>P NMR Spectrum of **1**.

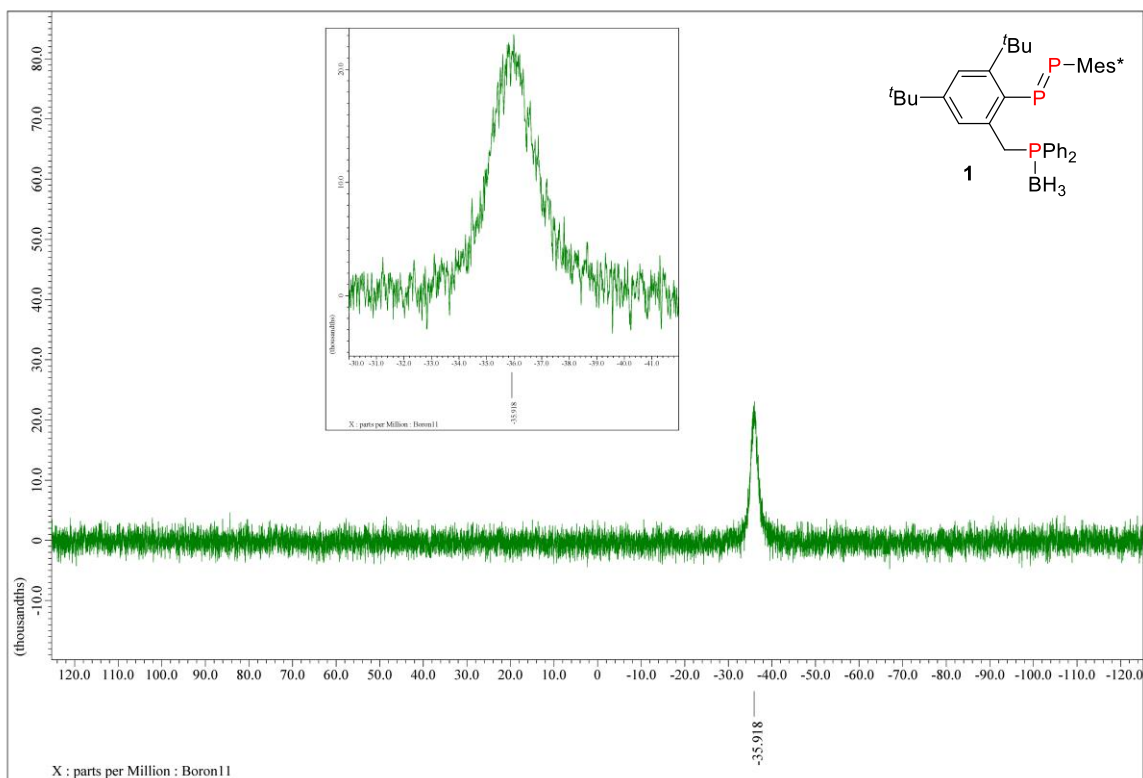

Fig. S19  $^{11}\text{B}$  NMR Spectrum of **1**.

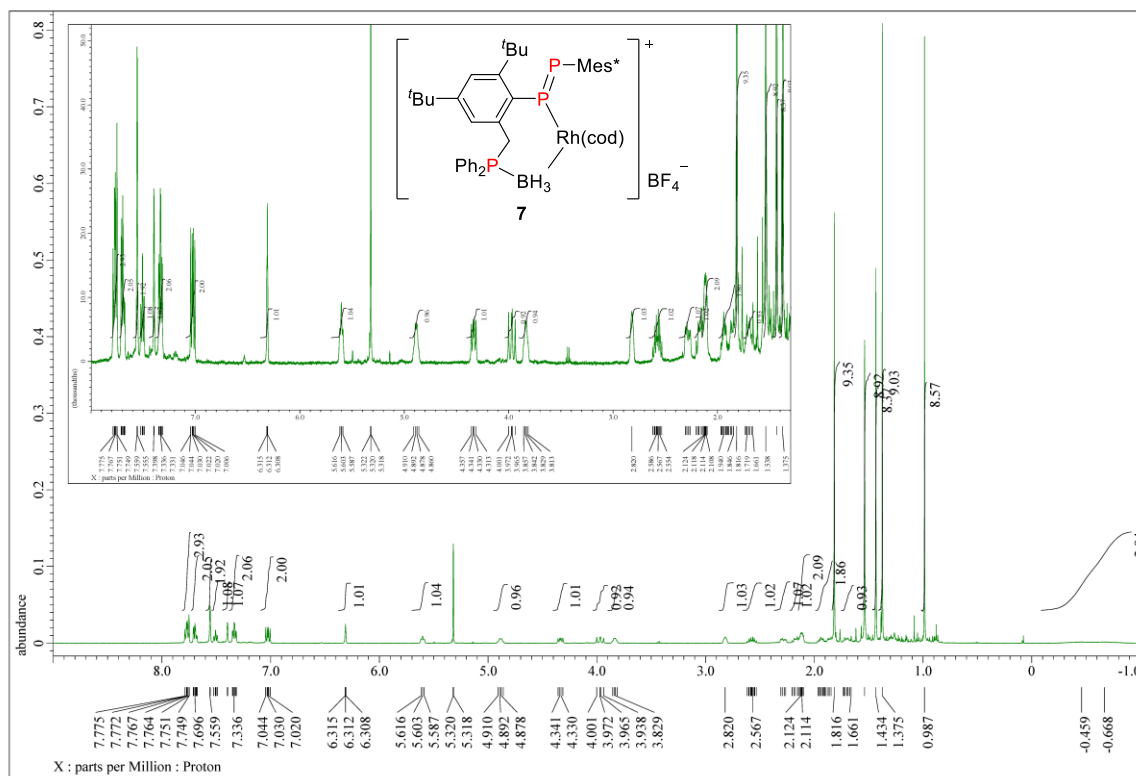

Fig. S20  $^1\text{H}$  NMR Spectrum of **7**.

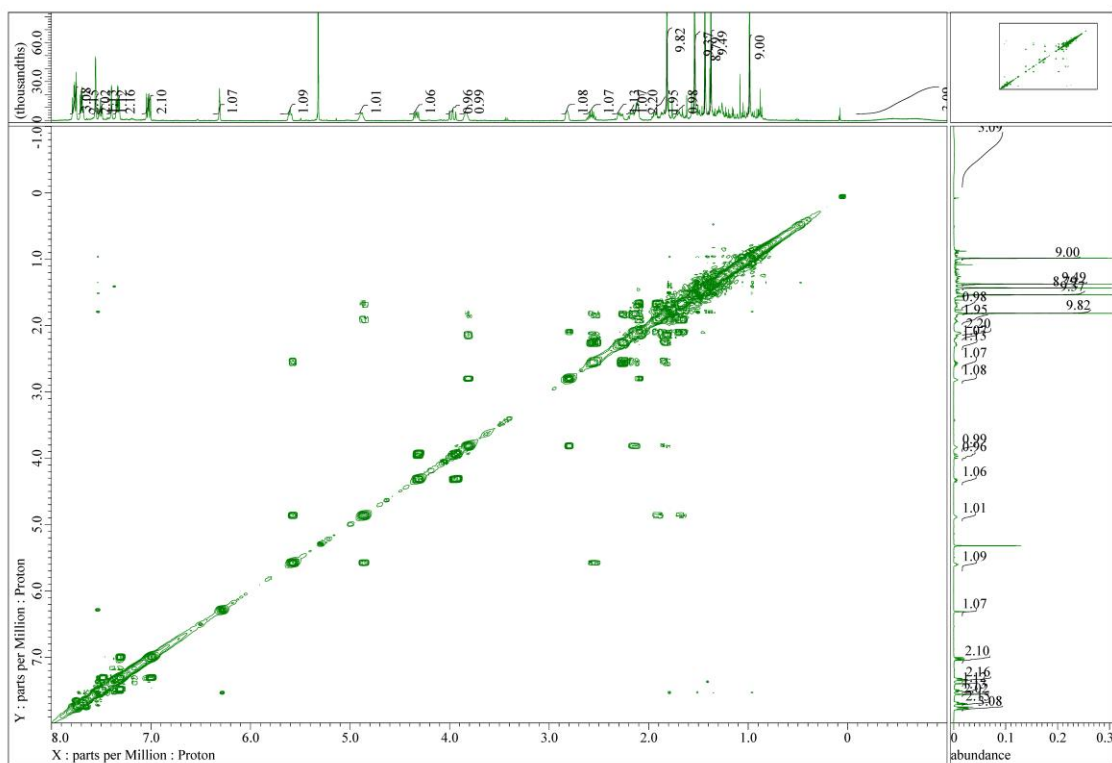

Fig. S21  $^1\text{H}$ - $^1\text{H}$  COSY Spectrum of **7**.

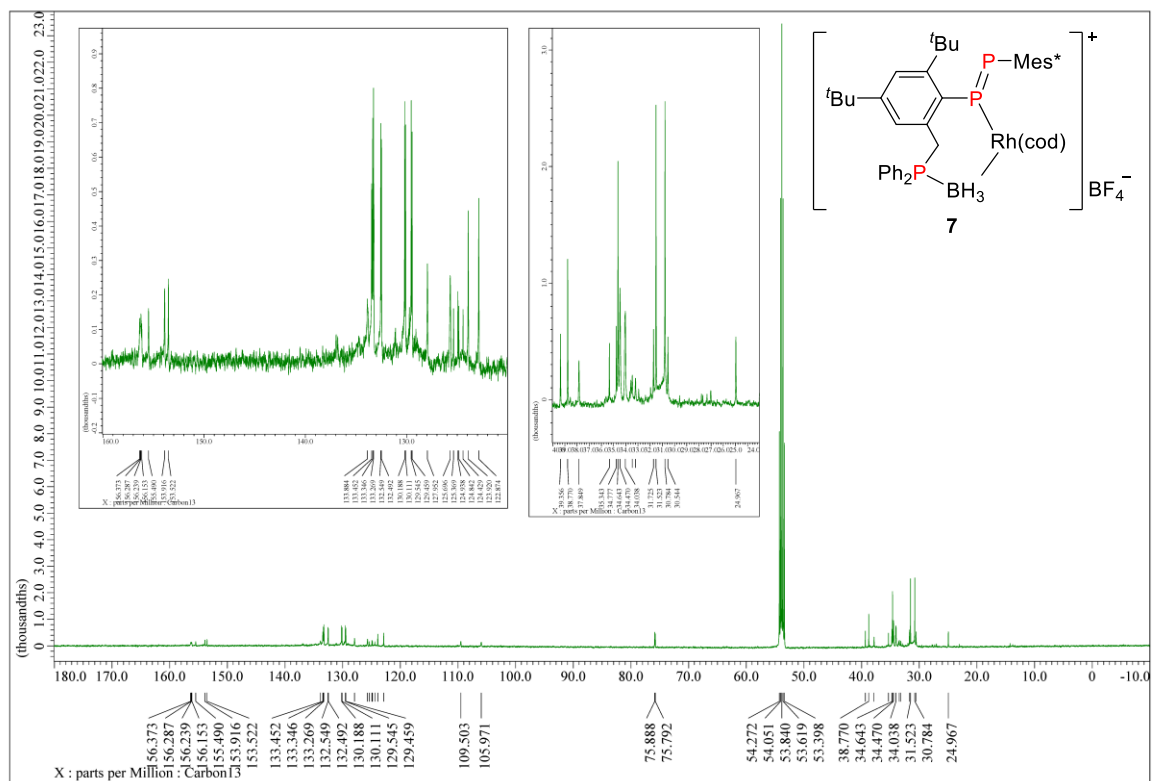

Fig. S22  $^{13}\text{C}$  NMR Spectrum of **7**.

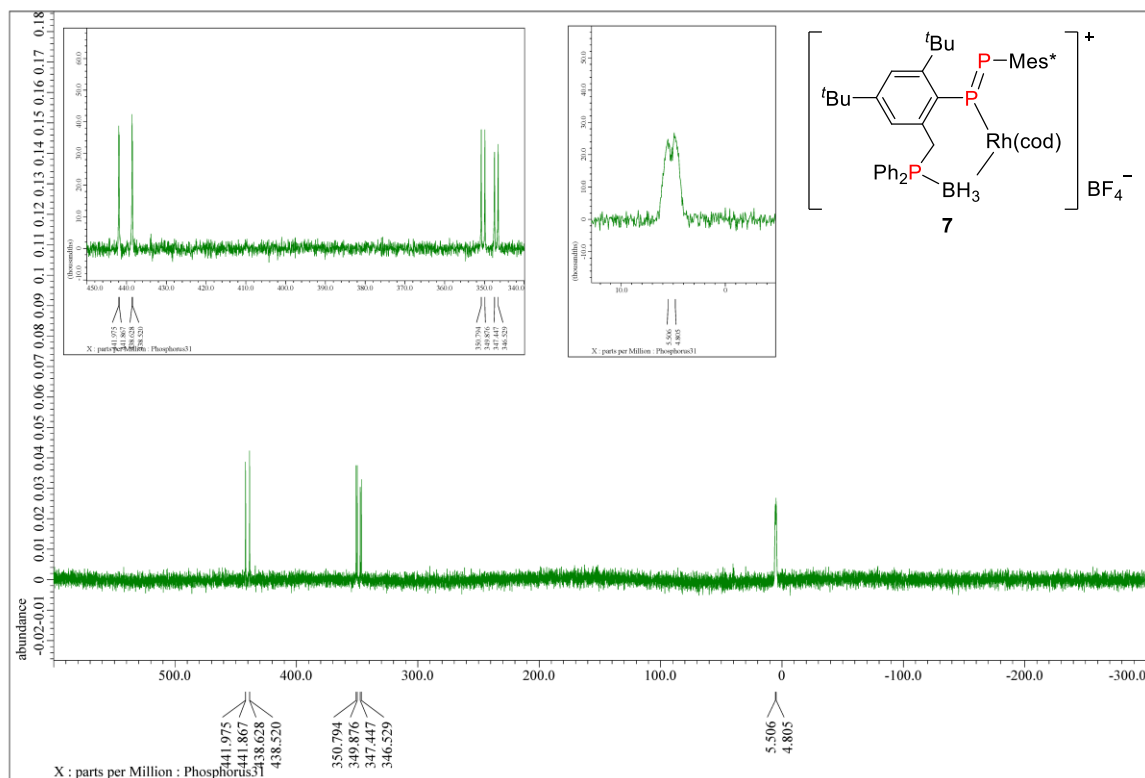

Fig. S23  $^{31}\text{P}$  NMR Spectrum of 7.

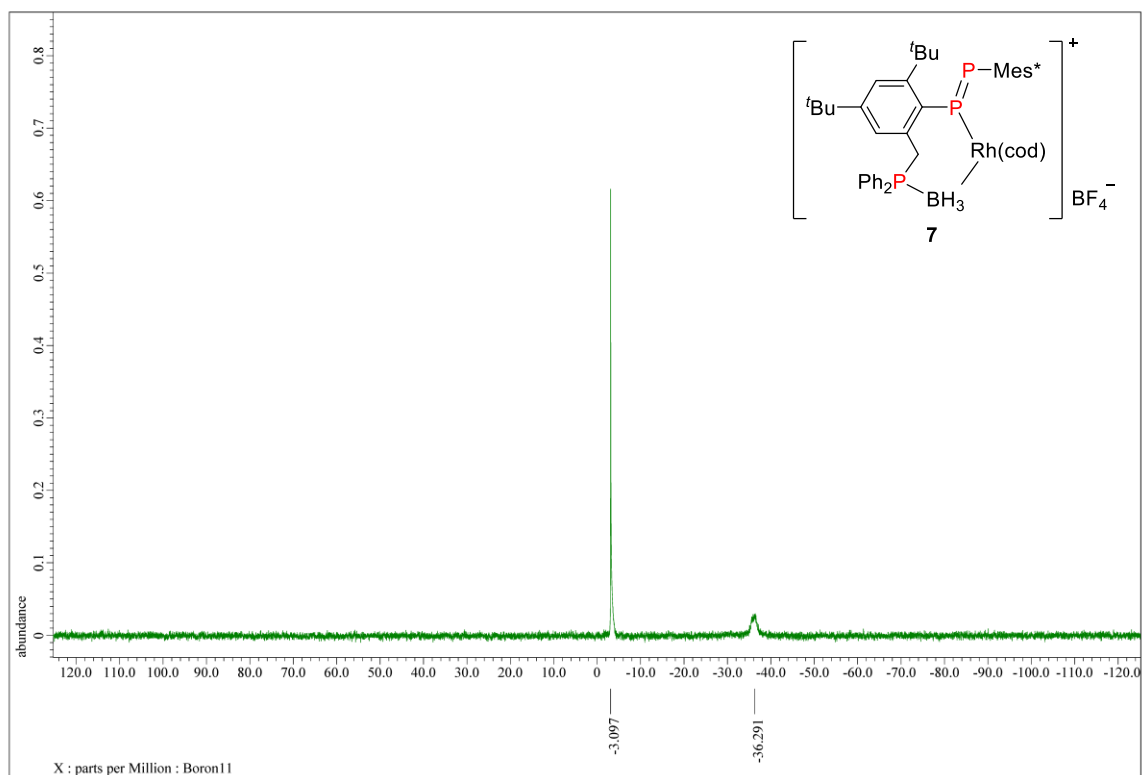

Fig. S24  $^{11}\text{B}$  NMR Spectrum of 7.

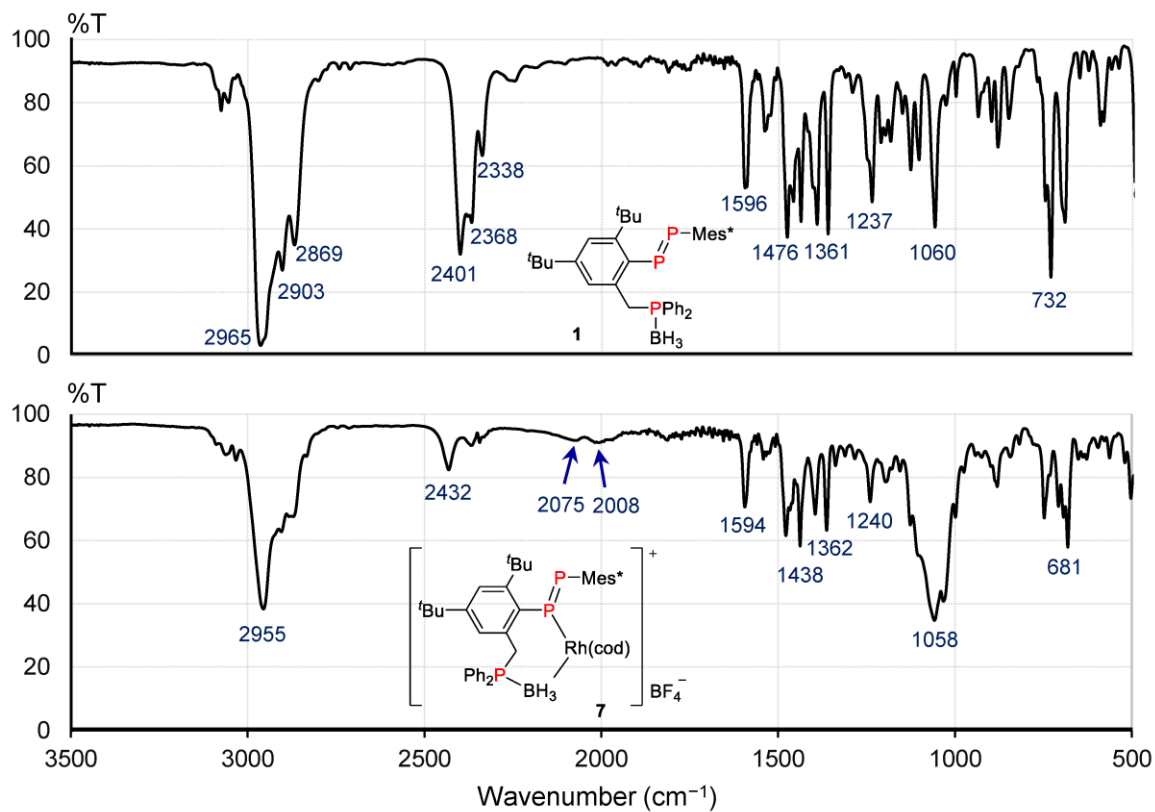

Fig. S25 IR Spectra of 1 and 7.

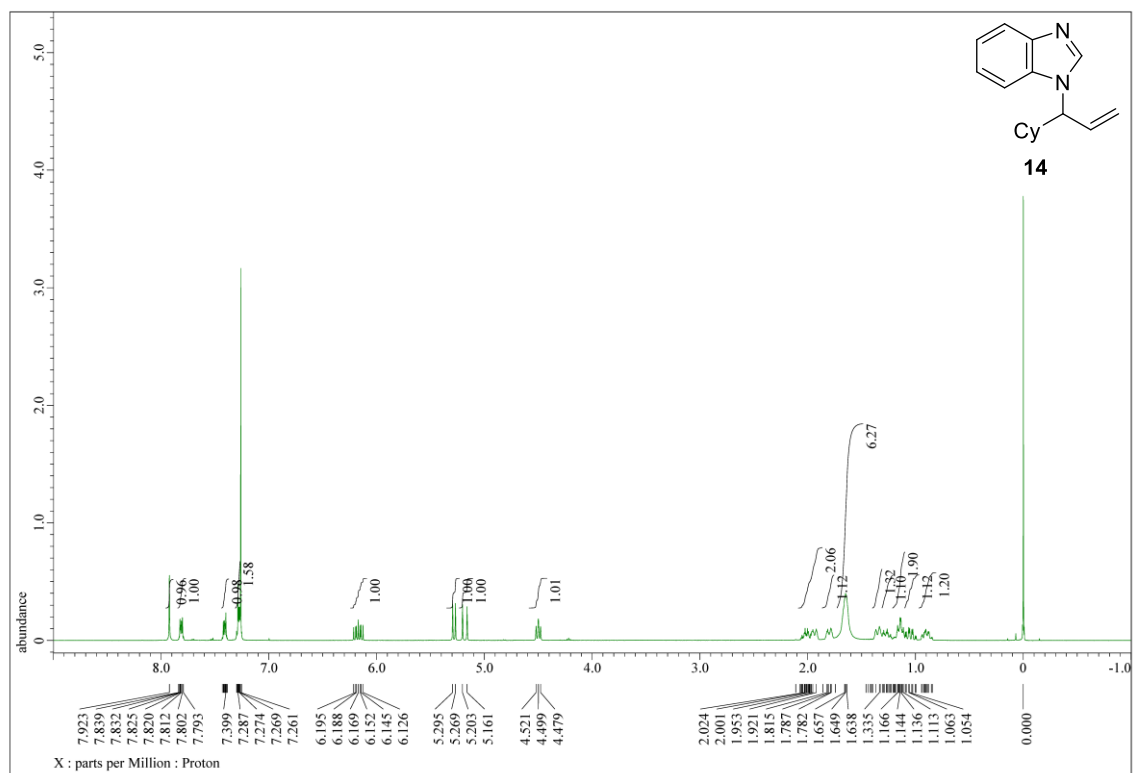

Fig. S26 <sup>1</sup>H NMR Spectrum of 14.

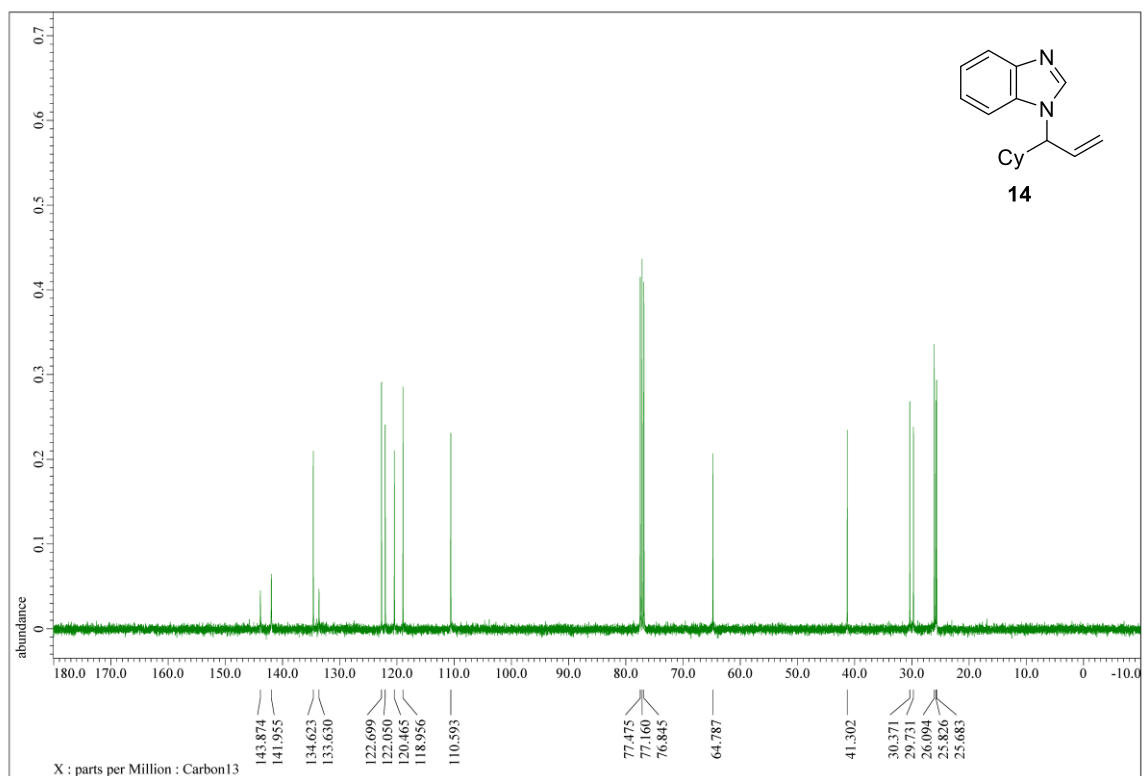

Fig. S27  $^{13}\text{C}$  NMR Spectrum of 14.

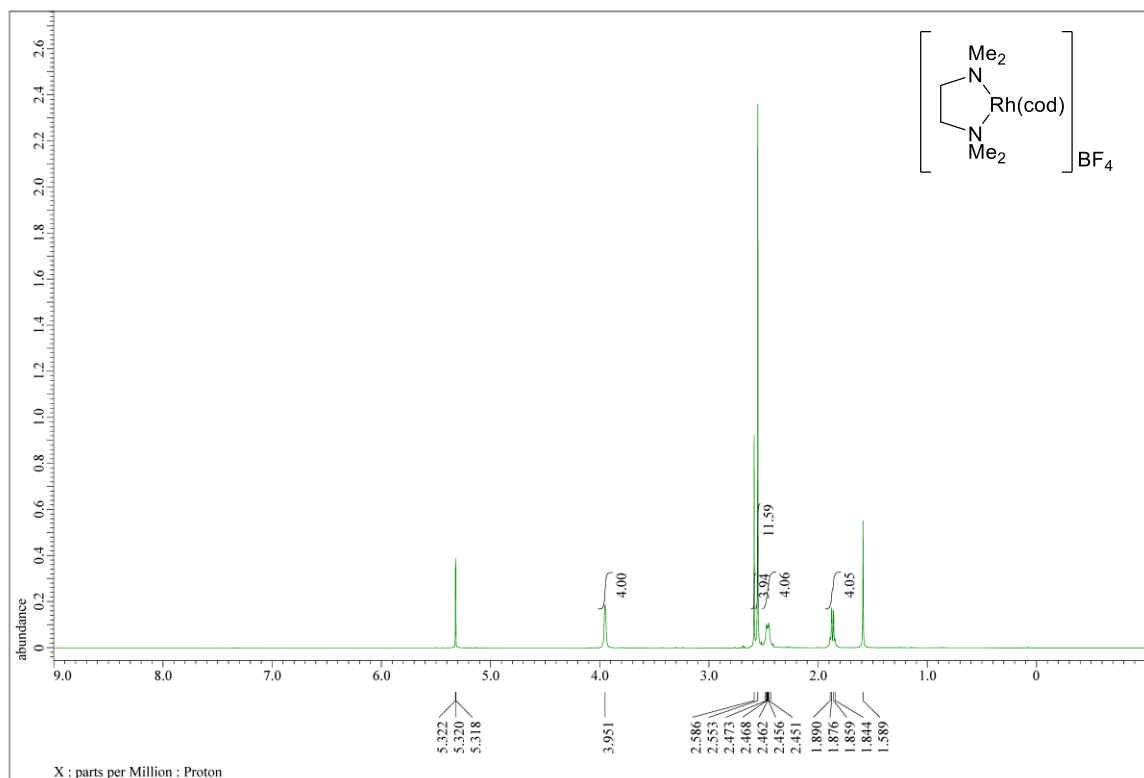

Fig. S28  $^1\text{H}$  NMR Spectrum of [Rh(tmeda)(cod)]BF<sub>4</sub>.

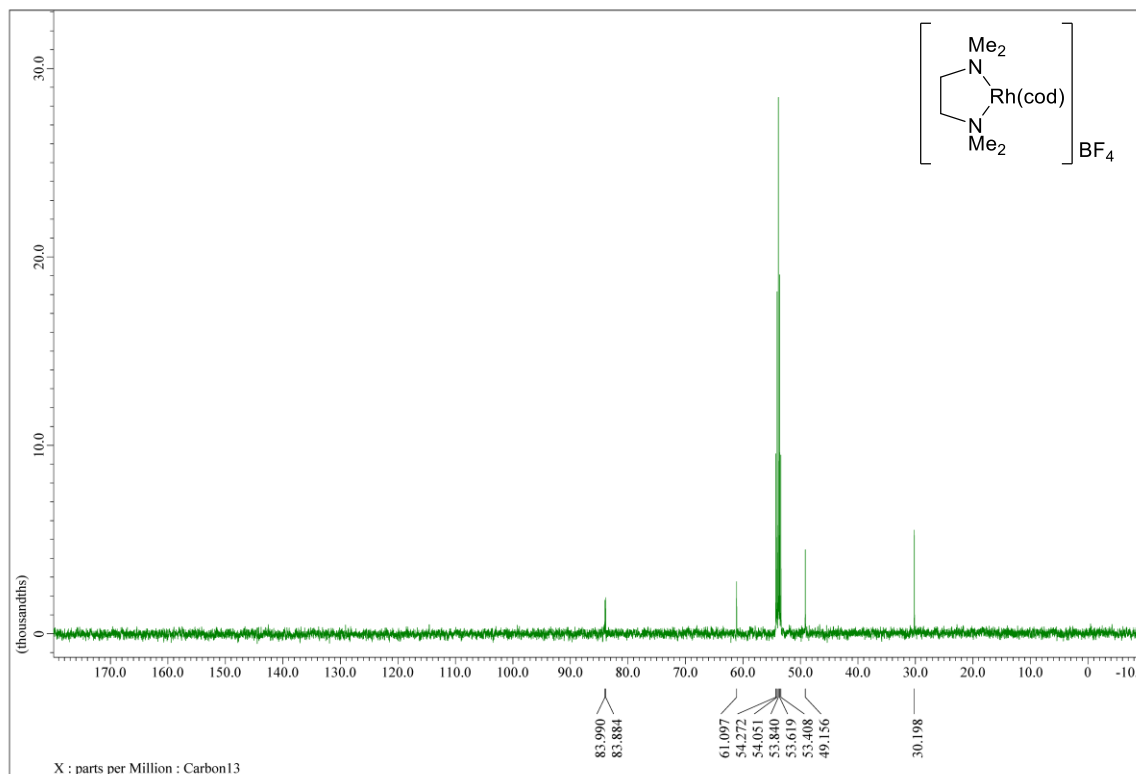

Fig. S29  $^{13}\text{C}$  NMR Spectrum of  $[\text{Rh}(\text{tmeda})(\text{cod})]\text{BF}_4$ .

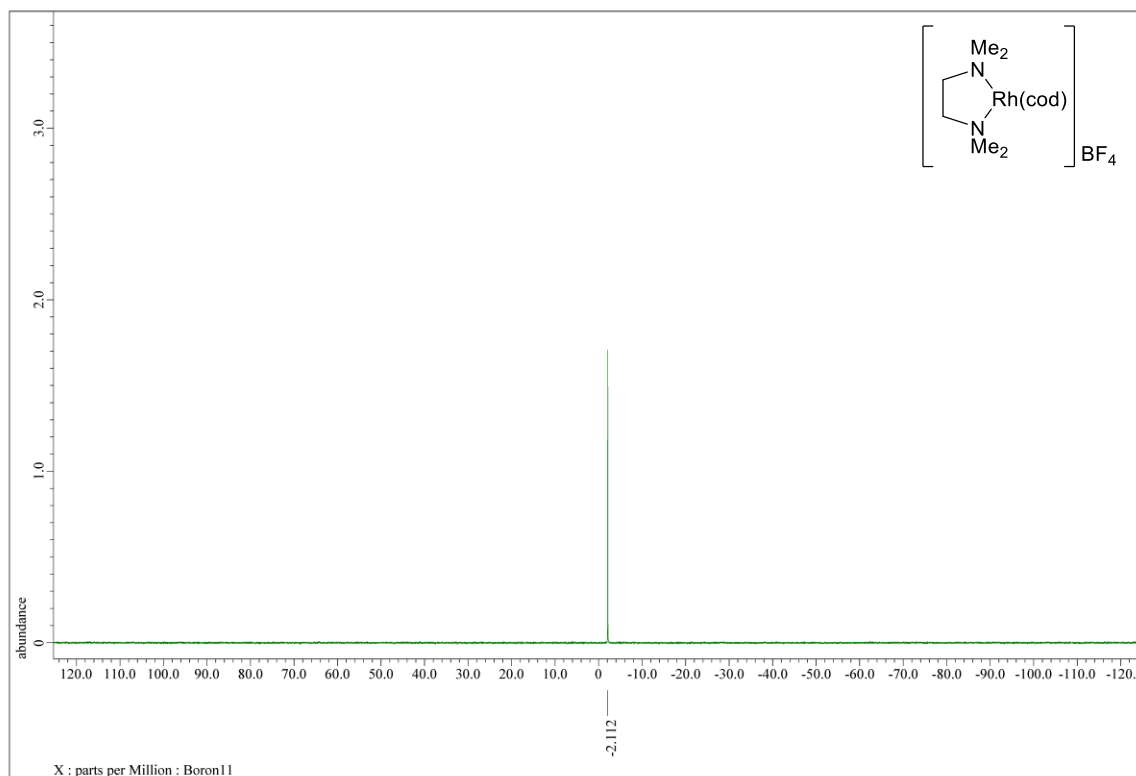

Fig. S30  $^{11}\text{B}$  NMR Spectrum of  $[\text{Rh}(\text{tmeda})(\text{cod})]\text{BF}_4$ .

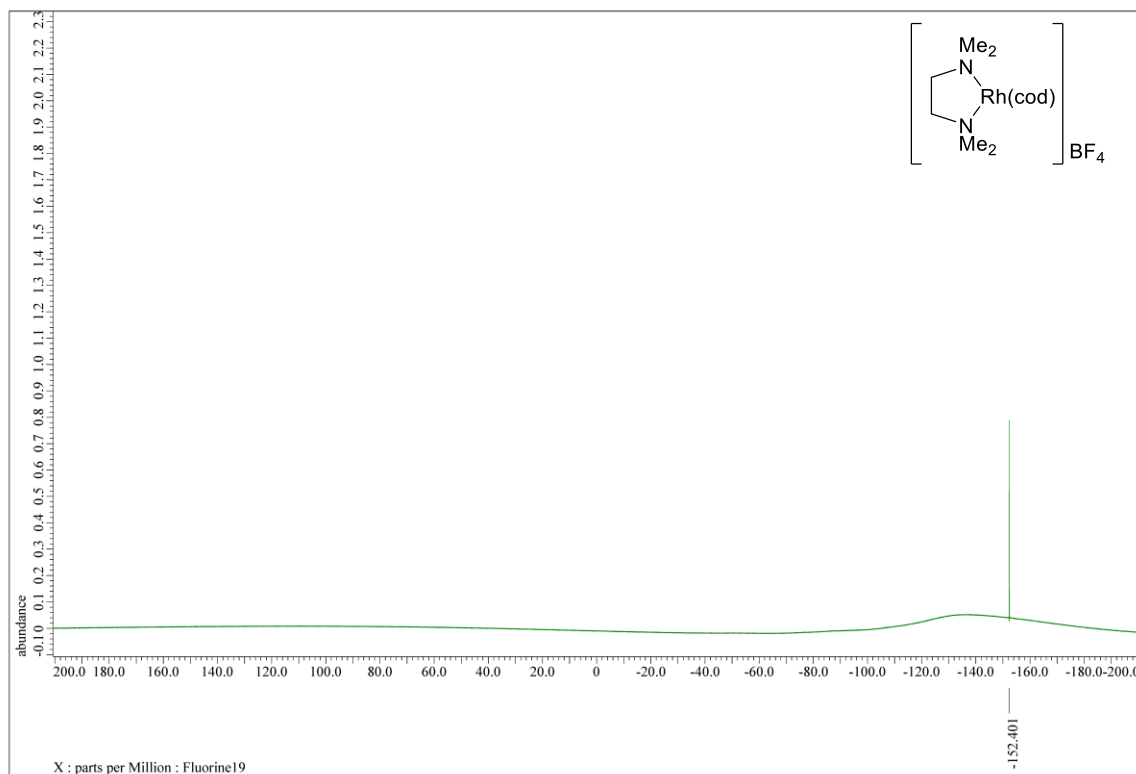

Fig. S31  $^{19}\text{F}$  NMR Spectrum of  $[\text{Rh}(\text{tmeda})(\text{cod})]\text{BF}_4$ .

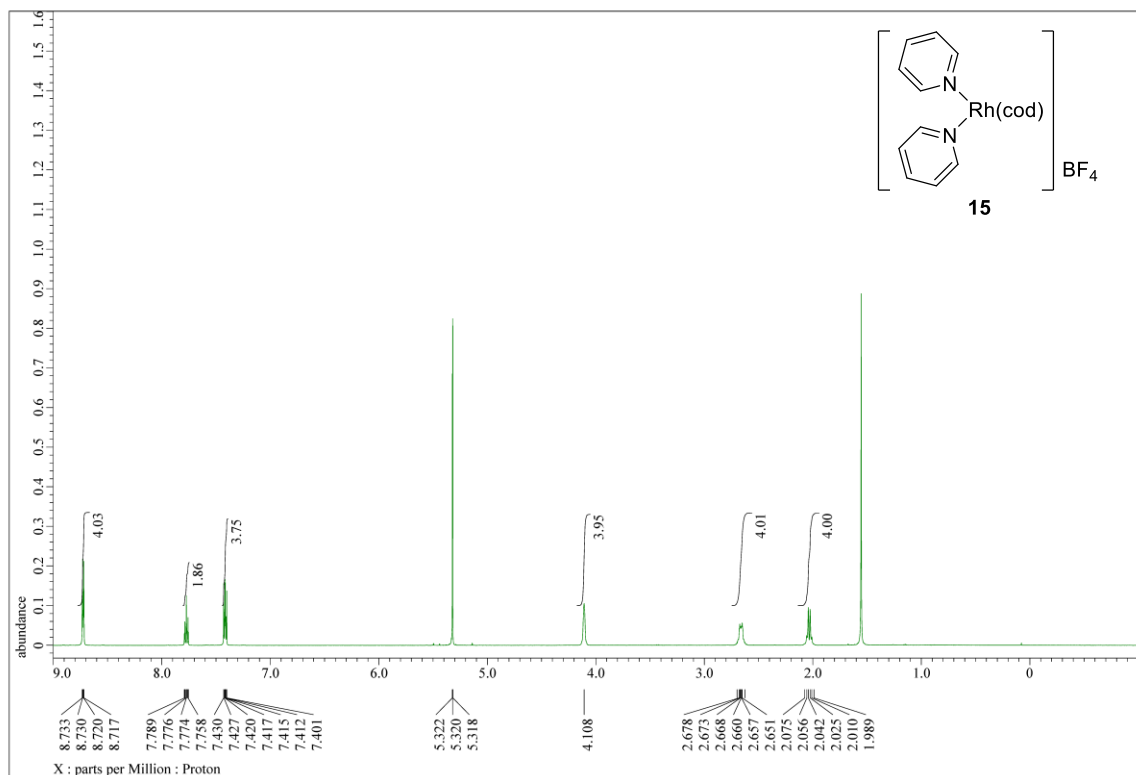

Fig. S32  $^1\text{H}$  NMR Spectrum of 15.



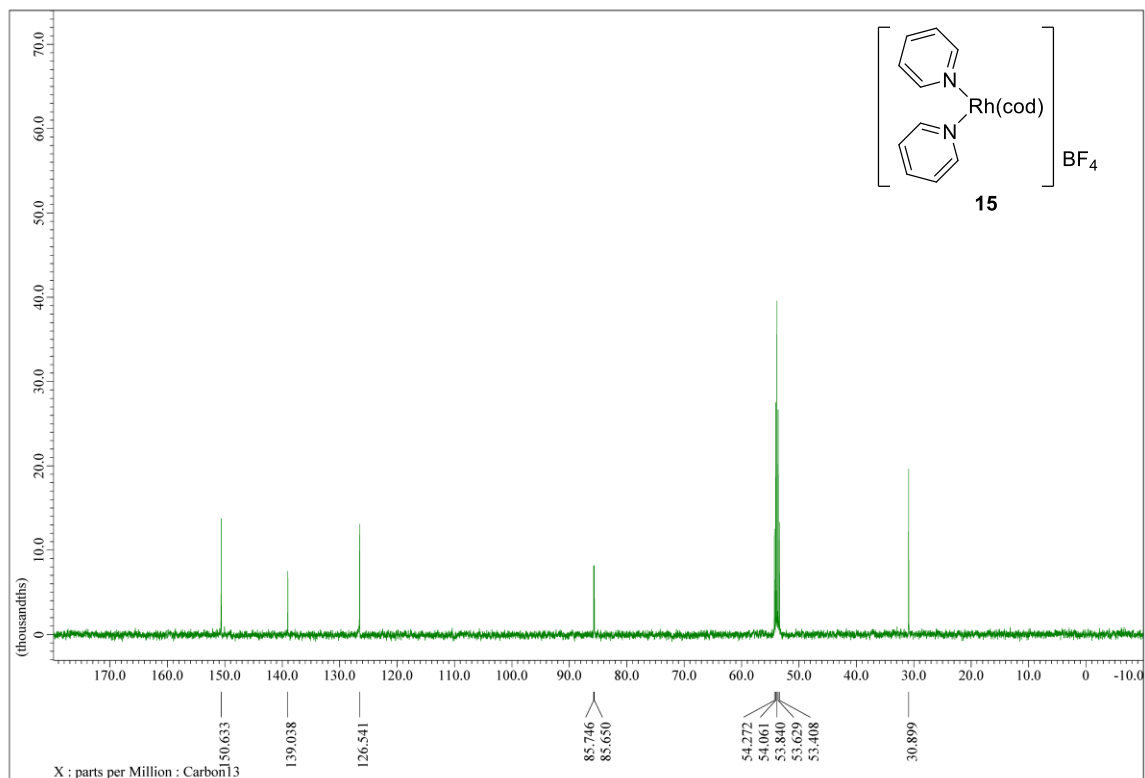

Fig. S33  $^{13}\text{C}$  NMR Spectrum of **15**.

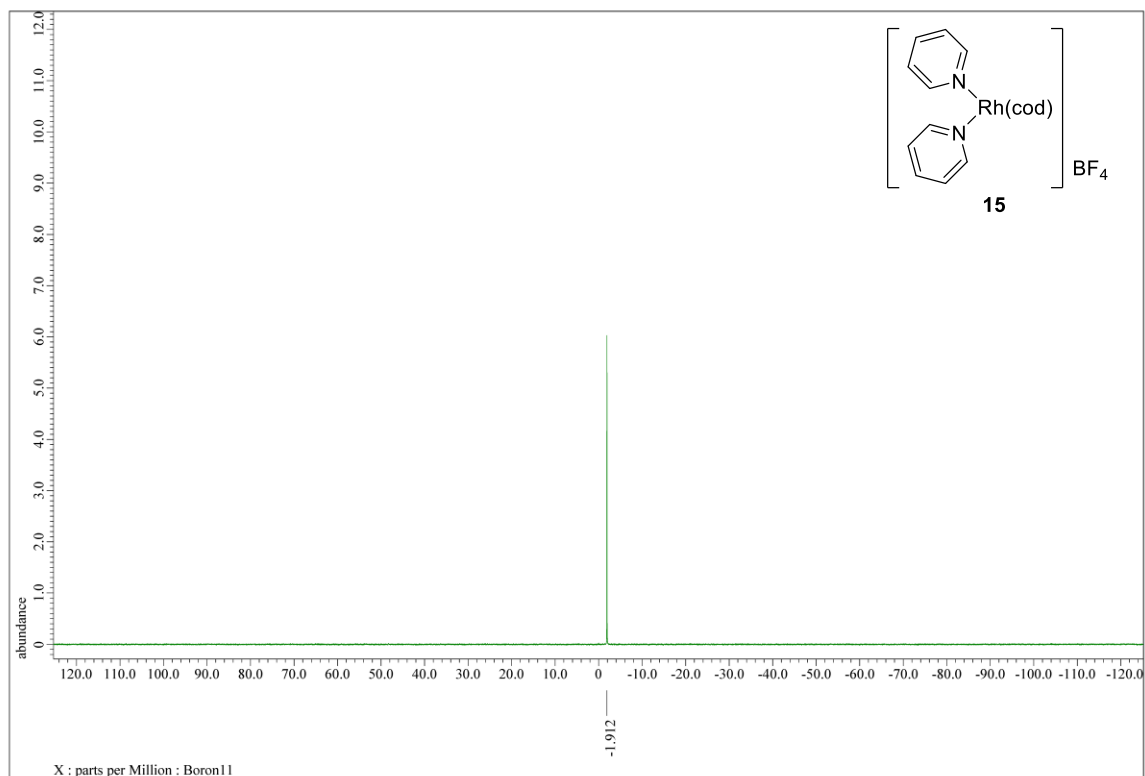

Fig. S34  $^{11}\text{B}$  NMR Spectrum of **15**.

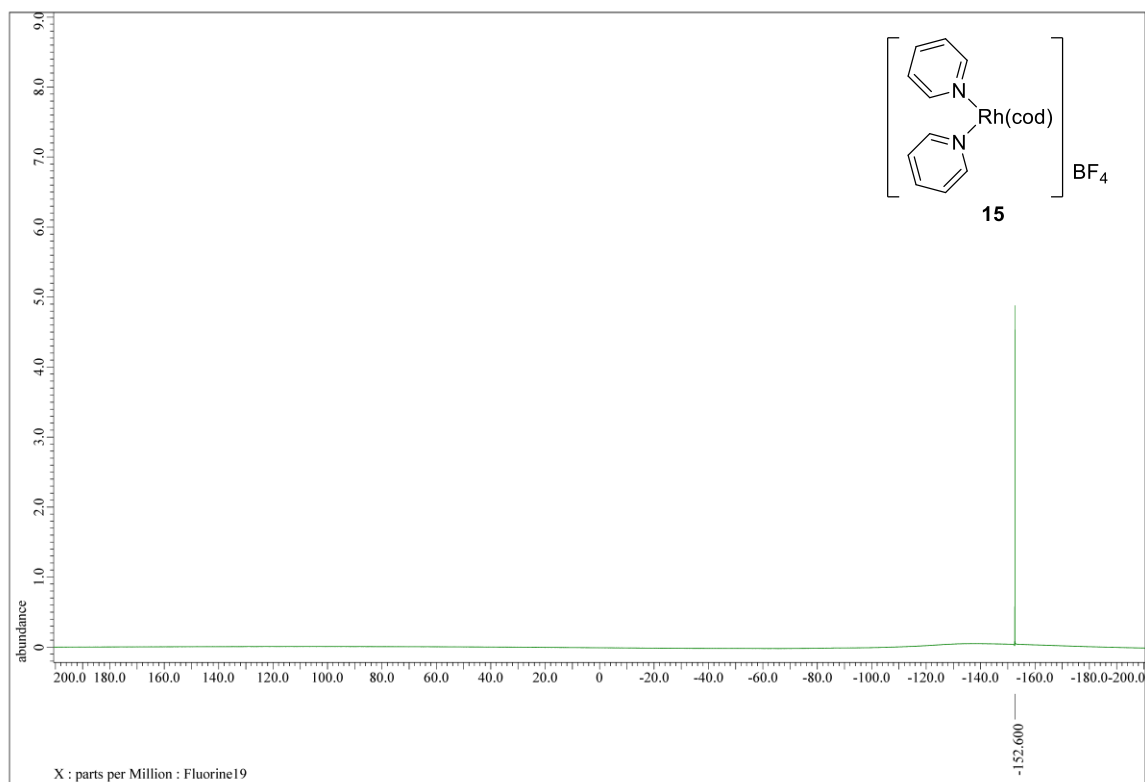

**Fig. S35**  $^{19}\text{F}$  NMR Spectrum of **15**.

### 3. Temperature-Dependent $^1\text{H}$ NMR Spectra

Temperature-dependent  $^1\text{H}$  NMR spectra (500 MHz) of diphosphene–rhodium complex **7** were measured in  $\text{CD}_2\text{Cl}_2$  with a JEOL JNM-ECZ500R spectrometer. The solution was prepared and charged into an NMR tube with a J. Young valve in a glovebox under an argon atmosphere. The spectra were measured at 20  $^\circ\text{C}$ , 0  $^\circ\text{C}$ , -20  $^\circ\text{C}$ , and every 10  $^\circ\text{C}$  from -20  $^\circ\text{C}$  to -90  $^\circ\text{C}$ . The observed NMR spectra are shown in Fig. S36.

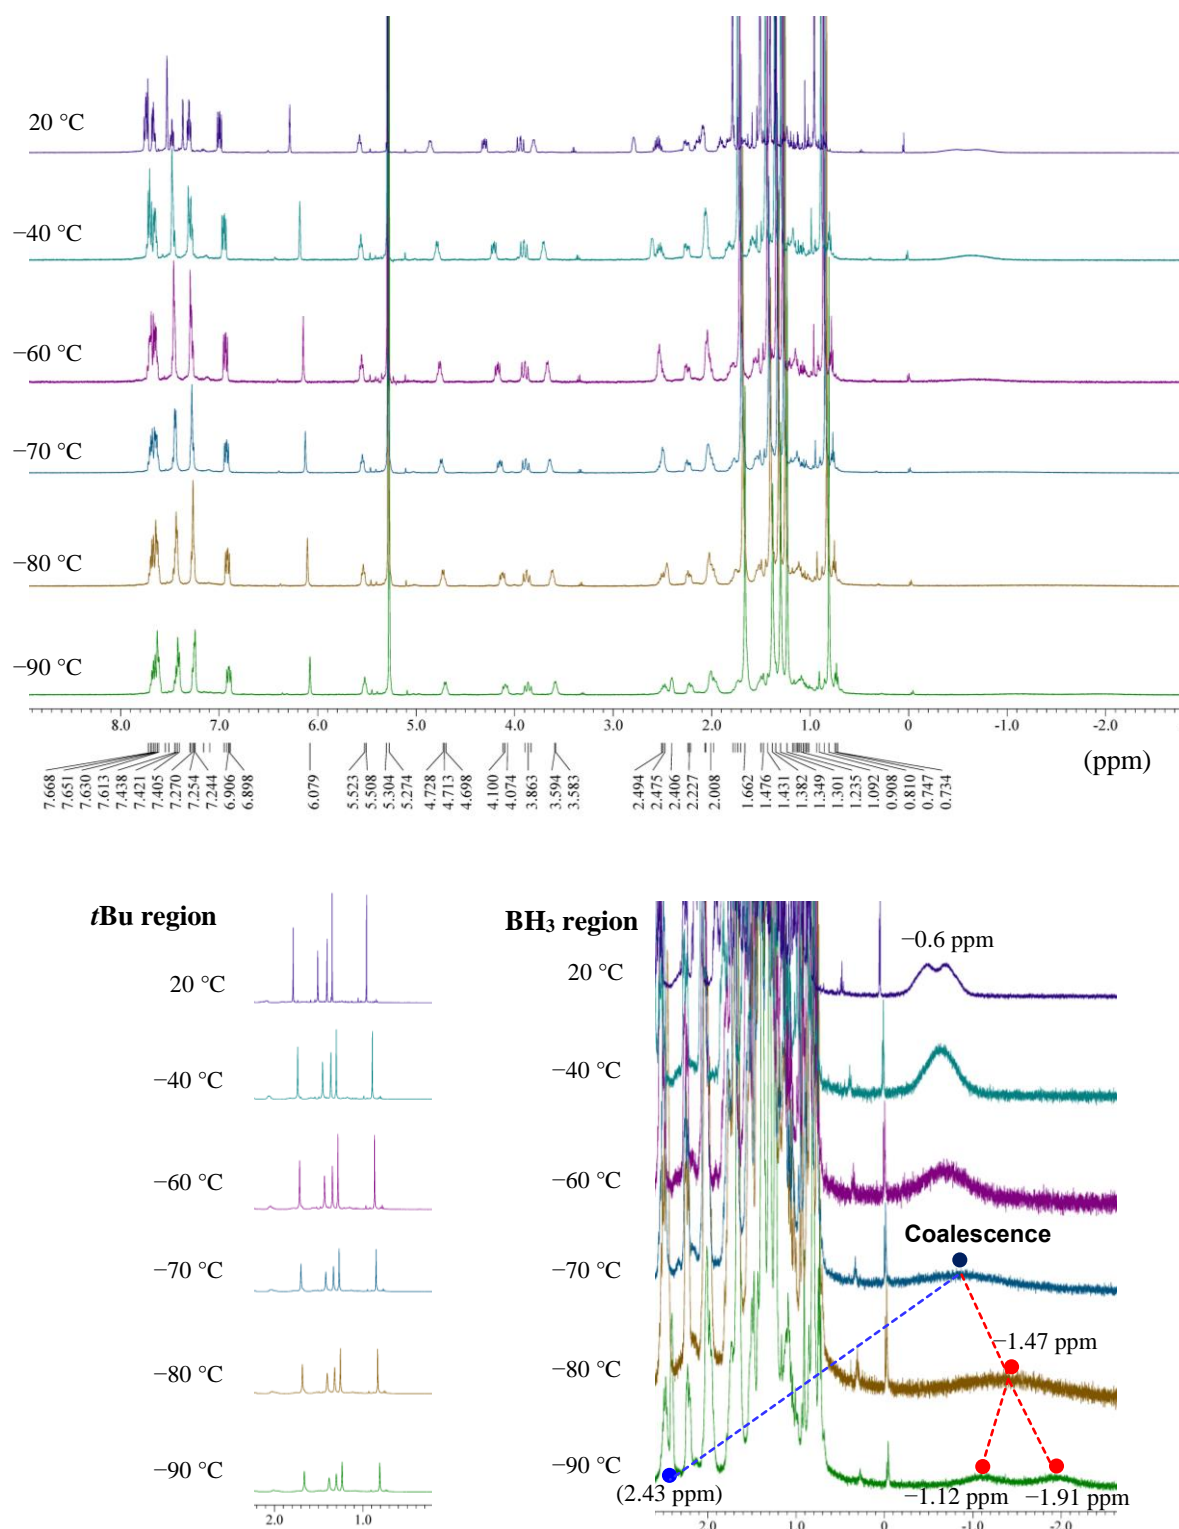

**Fig. S36** Temperature-dependent  $^1\text{H}$  NMR spectra of **7** in  $\text{CD}_2\text{Cl}_2$ .

## 4. Ligand Exchange Reactions of Diphosphene–Rhodium Complex 7

### 4-1. Reaction of 7 with *N*-donor reagent (20 eq.) in CD<sub>2</sub>Cl<sub>2</sub>

A solution of rhodium complex **7** (2.0 mg, 2.0 μmol) in CD<sub>2</sub>Cl<sub>2</sub> (0.7 mL) was charged into an NMR tube equipped with a J. Young valve under an argon atmosphere, and *N*-donor reagent (20 eq.) was added. The reaction was monitored by measuring the <sup>1</sup>H NMR spectra. The results are summarized in Figs. S37 to S41.

### 4-2. Reaction of diphosphene–phosphineborane ligand **1** with [Rh(py)<sub>2</sub>(cod)]BF<sub>4</sub> (**15**) in CD<sub>2</sub>Cl<sub>2</sub>

Diphosphene–phosphineborane ligand **1** (2.1 mg, 3.0 μmol) and **15** (1.3 mg, 2.9 μmol) were charged into an NMR tube equipped with a J. Young valve under an argon atmosphere, and CD<sub>2</sub>Cl<sub>2</sub> (0.7 mL) was added. The reaction was monitored by measuring the <sup>1</sup>H NMR spectra. The results are summarized in Figs. 3c and S40c.

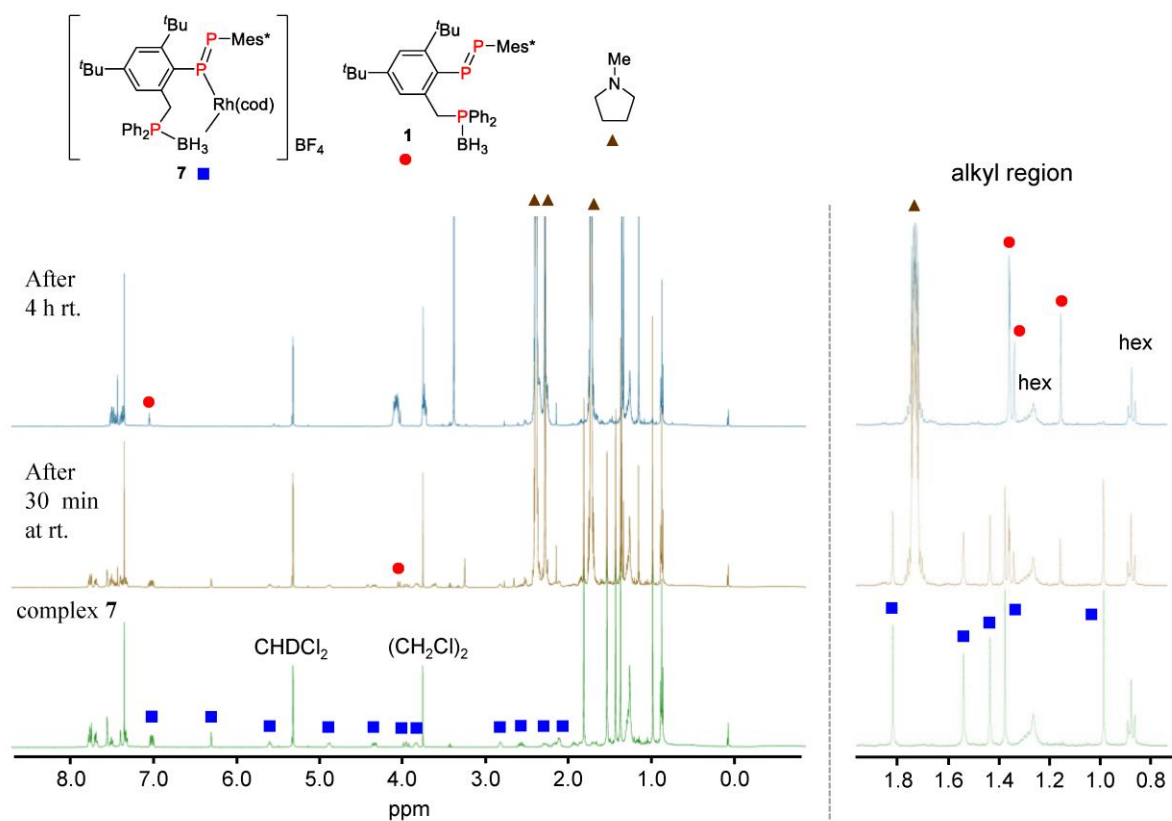

**Fig. S37** Reaction of **7** with *N*-methylpyrrolidine (20 eq.) at room temperature monitored by <sup>1</sup>H NMR spectra in CD<sub>2</sub>Cl<sub>2</sub>.

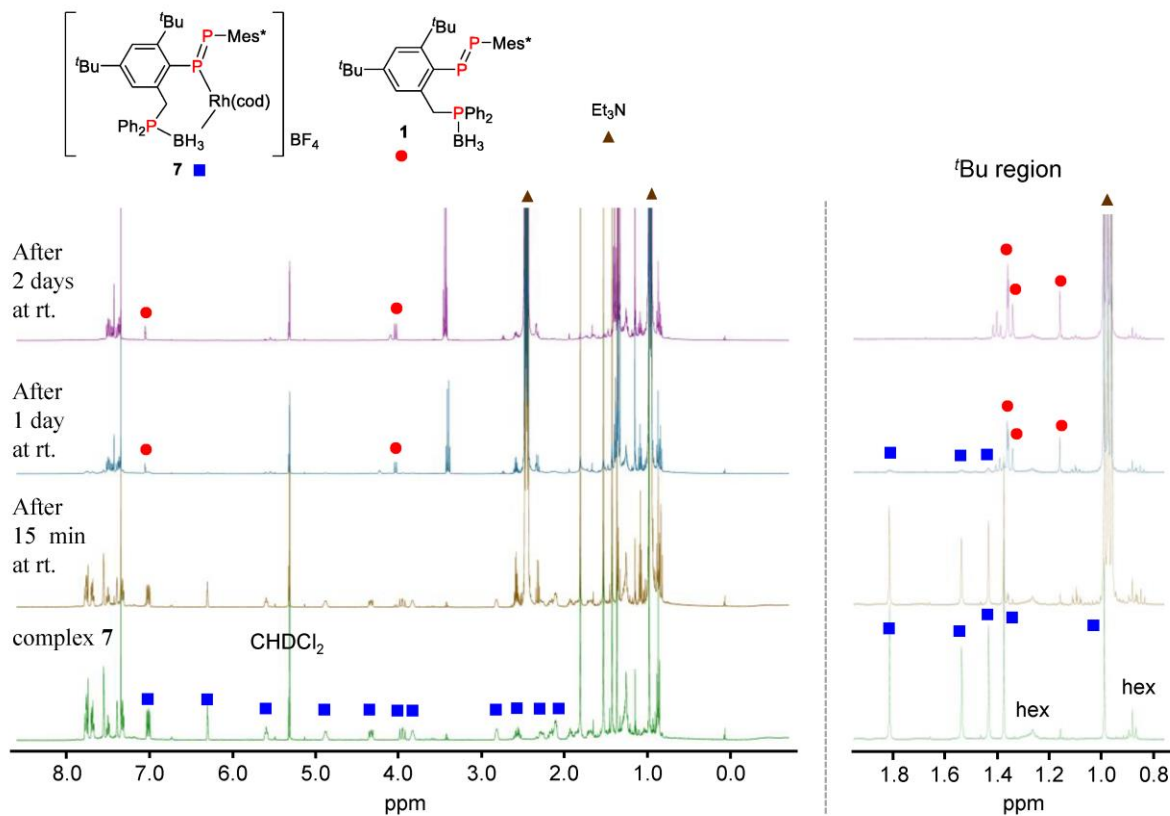

**Fig. S38** Reaction of **7** with Et<sub>3</sub>N (20 eq.) at room temperature monitored by <sup>1</sup>H NMR spectra in CD<sub>2</sub>Cl<sub>2</sub>.

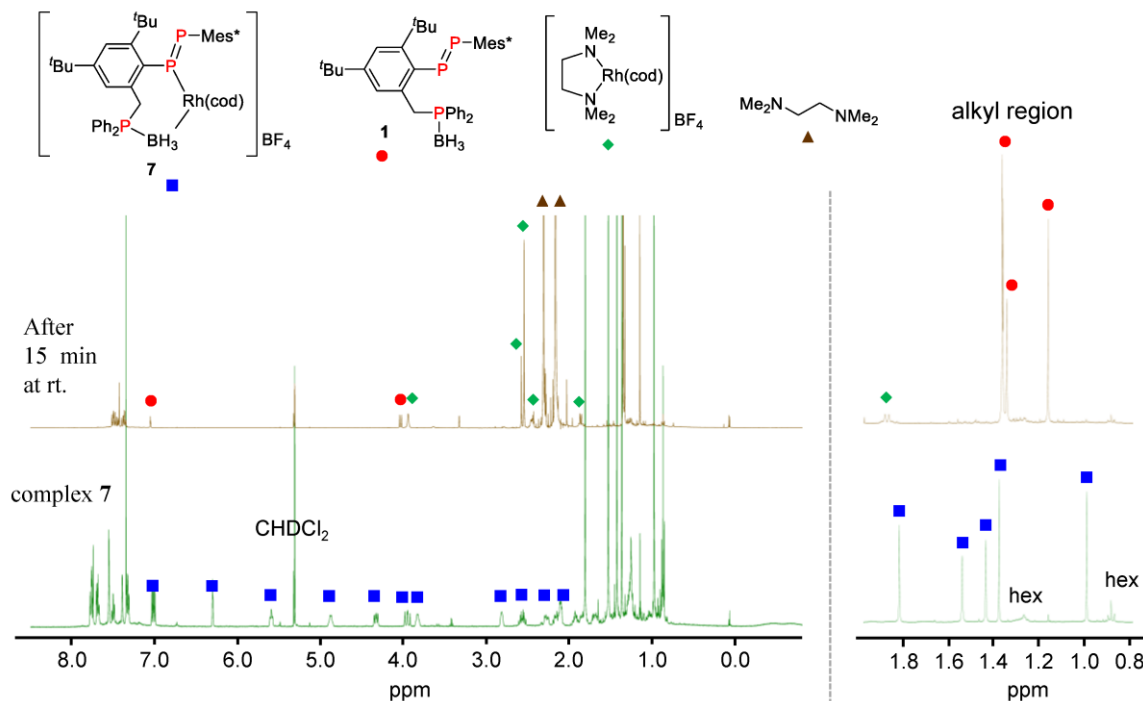

**Fig. S39** <sup>1</sup>H NMR spectrum of the crude mixture of the reaction of **7** with TMEDA (20 eq.) at room temperature.

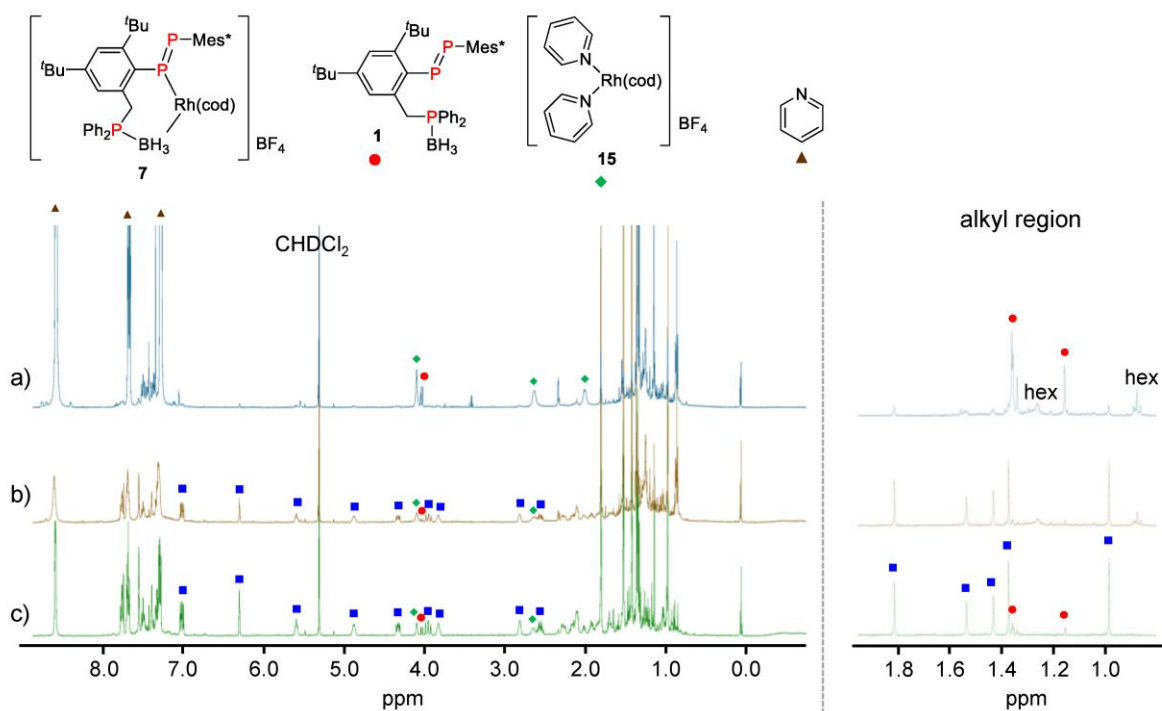

**Fig. S40**  $^1\text{H}$  NMR spectra measured in  $\text{CD}_2\text{Cl}_2$  (a) after the reaction of rhodium complex **7** with pyridine (20 eq.); (b) after removal of unreacted pyridine from the reaction mixture; (c) after the treatment of **1** with  $[\text{Rh}(\text{py})_2(\text{cod})]\text{BF}_4$  (**15**, 1 eq.).

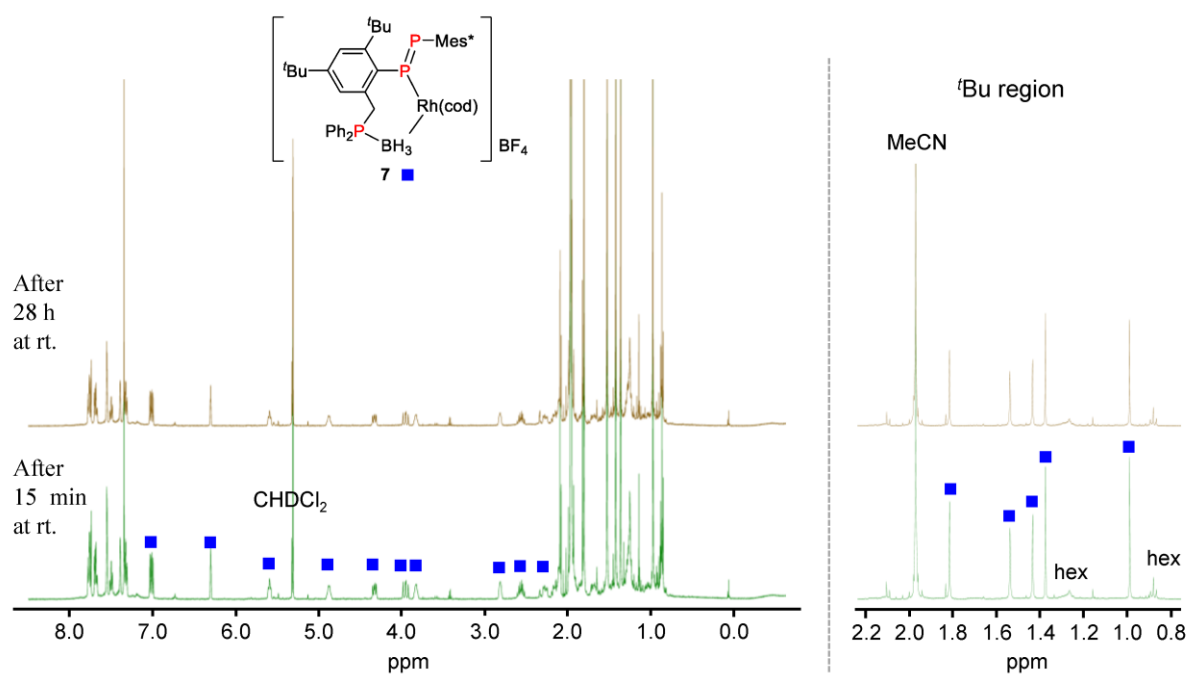

**Fig. S41** Reaction of **7** with MeCN (20 eq.) at room temperature monitored by  $^1\text{H}$  NMR spectra in  $\text{CD}_2\text{Cl}_2$ .

### 4-3. Titration of pyridine into a solution of diphosphene–rhodium complex **7** in CD<sub>2</sub>Cl<sub>2</sub>

Diphosphene–rhodium complex **7** (2 mg, 2 μmol), CD<sub>2</sub>Cl<sub>2</sub> (0.70 mL), and 1,4-dioxane (0.196 M in CD<sub>2</sub>Cl<sub>2</sub>; 5.1 μL, 1.0 μmol) were charged into an NMR tube equipped with a J. Young valve under an argon atmosphere. Pyridine (0.996 M in CD<sub>2</sub>Cl<sub>2</sub>) was added, and <sup>1</sup>H NMR (500 MHz) spectra were measured. The integrals of the doublet of doublets signal of **7** at 6.31 ppm (1H), the multiplet signal of pyridine around 8.6 ppm (2H), the doublet signal of **1** at 4.05 ppm (2H), the multiplet signal of **15** around 4.1 ppm (4H), and the singlet signal of 1,4-dioxane at 3.65 ppm (8H; 1.0 μmol) as the internal standard were used.

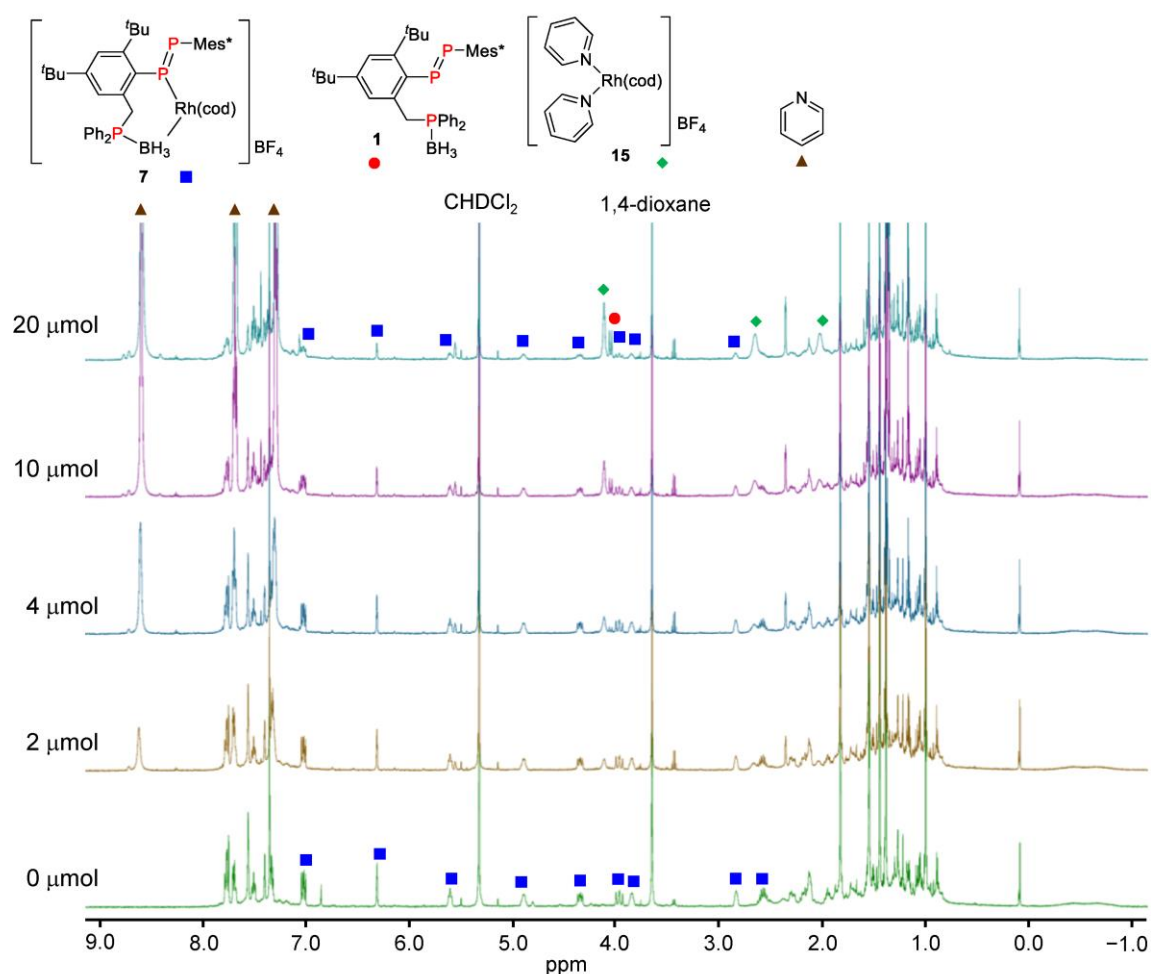

**Fig. S42** <sup>1</sup>H NMR spectra of the titration of pyridine (0.996 M in CD<sub>2</sub>Cl<sub>2</sub>) into diphosphene–rhodium complex **7** in CD<sub>2</sub>Cl<sub>2</sub>.

**Table S1** Integral intensities, amounts ( $\mu\text{mol}$ ), and concentrations ( $\text{mol L}^{-1}$ ) of diphosphene–rhodium complex **7**, pyridine (py), diphosphene–phosphineborane ligand **1**, and  $[\text{Rh}(\text{py})_2(\text{cod})]\text{BF}_4$  (**15**) after titration with pyridine (0.996 M in  $\text{CD}_2\text{Cl}_2$ ).

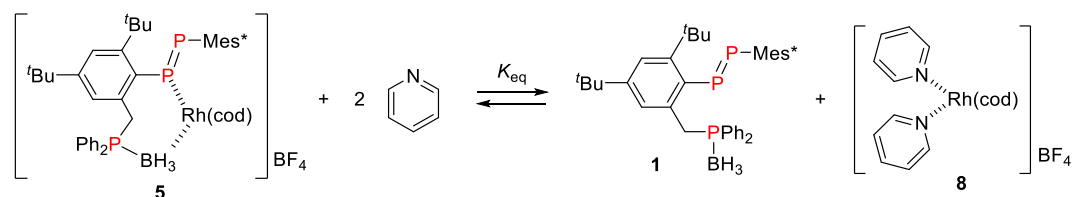

| Addition                                  |                               | Compound              |                       |                       |                       |                      | $K_{\text{eq}}^b$ |
|-------------------------------------------|-------------------------------|-----------------------|-----------------------|-----------------------|-----------------------|----------------------|-------------------|
|                                           |                               | <b>7</b>              | py                    | <b>1</b>              | <b>15</b>             | dioxane <sup>a</sup> |                   |
| 0 $\mu\text{L}$<br>(0 $\mu\text{mol}$ )   | Integral                      | 0.954                 | –                     | –                     | –                     | 8.0                  |                   |
|                                           | Amount ( $\mu\text{mol}$ )    | 0.954                 | –                     | –                     | –                     | 1.0                  |                   |
|                                           | Conc. ( $\text{mol L}^{-1}$ ) | $1.35 \times 10^{-3}$ | –                     | –                     | –                     |                      |                   |
| 1 $\mu\text{L}$<br>(1 $\mu\text{mol}$ )   | Integral                      | 1.03                  | 1.09                  | n.d. <sup>c</sup>     | 0.632                 | 8.0                  |                   |
|                                           | Amount ( $\mu\text{mol}$ )    | 1.03                  | 0.547                 | –                     | 0.158                 | 1.0                  |                   |
|                                           | Conc. ( $\text{mol L}^{-1}$ ) | $1.45 \times 10^{-3}$ | $7.75 \times 10^{-4}$ | –                     | $2.24 \times 10^{-4}$ |                      | –                 |
| 2 $\mu\text{L}$<br>(2 $\mu\text{mol}$ )   | Integral                      | 0.996                 | 3.37                  | 0.034                 | 0.737                 | 8.0                  |                   |
|                                           | Amount ( $\mu\text{mol}$ )    | 0.996                 | 1.69                  | 0.017                 | 0.184                 | 1.0                  |                   |
|                                           | Conc. ( $\text{mol L}^{-1}$ ) | $1.41 \times 10^{-3}$ | $2.39 \times 10^{-3}$ | $2.40 \times 10^{-5}$ | $2.61 \times 10^{-4}$ |                      | 0.78              |
| 4 $\mu\text{L}$<br>(4 $\mu\text{mol}$ )   | Integral                      | 0.910                 | 7.42                  | 0.144                 | 1.19                  | 8.0                  |                   |
|                                           | Amount ( $\mu\text{mol}$ )    | 0.910                 | 3.71                  | 0.072                 | 0.297                 | 1.0                  |                   |
|                                           | Conc. ( $\text{mol L}^{-1}$ ) | $1.28 \times 10^{-3}$ | $5.23 \times 10^{-3}$ | $1.02 \times 10^{-4}$ | $4.19 \times 10^{-4}$ |                      | 1.21              |
| 7 $\mu\text{L}$<br>(7 $\mu\text{mol}$ )   | Integral                      | 0.830                 | 14.3                  | 0.318                 | 1.65                  | 8.0                  |                   |
|                                           | Amount ( $\mu\text{mol}$ )    | 0.830                 | 7.14                  | 0.159                 | 0.414                 | 1.0                  |                   |
|                                           | Conc. ( $\text{mol L}^{-1}$ ) | $1.17 \times 10^{-3}$ | $1.00 \times 10^{-2}$ | $2.23 \times 10^{-4}$ | $5.81 \times 10^{-4}$ |                      | 1.11              |
| 10 $\mu\text{L}$<br>(10 $\mu\text{mol}$ ) | Integral                      | 0.690                 | 21.3                  | 0.531                 | 2.01                  | 8.0                  |                   |
|                                           | Amount ( $\mu\text{mol}$ )    | 0.690                 | 10.6                  | 0.266                 | 0.503                 | 1.0                  |                   |
|                                           | Conc. ( $\text{mol L}^{-1}$ ) | $9.65 \times 10^{-4}$ | $1.49 \times 10^{-2}$ | $3.71 \times 10^{-4}$ | $7.04 \times 10^{-4}$ |                      | 1.23              |
| 15 $\mu\text{L}$<br>(15 $\mu\text{mol}$ ) | Integral                      | 0.536                 | 35.0                  | 0.752                 | 2.77                  | 8.0                  |                   |
|                                           | Amount ( $\mu\text{mol}$ )    | 0.536                 | 17.5                  | 0.376                 | 0.692                 | 1.0                  |                   |
|                                           | Conc. ( $\text{mol L}^{-1}$ ) | $7.44 \times 10^{-4}$ | $2.43 \times 10^{-2}$ | $5.22 \times 10^{-4}$ | $9.61 \times 10^{-4}$ |                      | 1.14              |
| 20 $\mu\text{L}$<br>(20 $\mu\text{mol}$ ) | Integral                      | 0.455                 | 44.8                  | 0.919                 | 3.10                  | 8.0                  |                   |
|                                           | Amount ( $\mu\text{mol}$ )    | 0.455                 | 22.4                  | 0.460                 | 0.775                 | 1.0                  |                   |
|                                           | Conc. ( $\text{mol L}^{-1}$ ) | $6.28 \times 10^{-4}$ | $3.09 \times 10^{-2}$ | $6.34 \times 10^{-4}$ | $1.07 \times 10^{-3}$ |                      | 1.13              |
| 25 $\mu\text{L}$<br>(25 $\mu\text{mol}$ ) | Integral                      | 0.353                 | 57.4                  | 1.05                  | 3.49                  | 8.0                  |                   |
|                                           | Amount ( $\mu\text{mol}$ )    | 0.353                 | 28.7                  | 0.527                 | 0.874                 | 1.0                  |                   |
|                                           | Conc. ( $\text{mol L}^{-1}$ ) | $4.83 \times 10^{-4}$ | $3.93 \times 10^{-2}$ | $7.21 \times 10^{-4}$ | $1.20 \times 10^{-3}$ |                      | 1.15              |

a) Internal standard. b) Equilibrium constant,  $K_{\text{eq}} = ([\mathbf{1}] \cdot [\mathbf{15}]) / ([\mathbf{7}] \cdot [\text{py}]^2)$ . c) Not determined owing to the low intensity.



## 5. X-ray Crystallographic Analysis

Orange crystals of diphosphene–phosphineborane ligand **1** and red-orange crystals of diphosphene–rhodium complex **7** were grown by slow evaporation of hexane solution (for **1**) and recrystallization from 1,2-dichloroethane/diisopropyl ether at  $-25\text{ }^{\circ}\text{C}$  in a glovebox under an argon atmosphere. X-ray data of **1** were collected on a Rigaku Saturn diffractometer with VariMax multi-layer mirror monochromated Mo-K $\alpha$  radiation ( $\lambda = 0.71073\text{ \AA}$ ) at  $-170\text{ }^{\circ}\text{C}$ . The data were corrected for Lorentz and polarization effects. An empirical absorption correction based on multiple measurements of equivalent reflections was applied using the REQABS program in CrystalClear software. X-ray data of **7** were collected on an XtaLAB Synergy four-circle diffractometer (Rigaku Oxford Diffraction) with a HyPix-6000HE hybrid pixel two-dimensional detector and a PhotonJet monochromated Cu-K $\alpha$  radiation ( $\lambda = 1.5418\text{ \AA}$ ) at  $-173\text{ }^{\circ}\text{C}$ . An empirical absorption correction was applied using spherical harmonics implemented in SCALE3 ABSPACK scaling algorithm in CrysAlisPro (1.171.42.72a) software. The structures were solved by direct methods (SIR2014<sup>S9</sup> for **1** and SHELXS2013<sup>S10</sup> for **7**) and refined by the full-matrix least squares method against  $F^2$  using all data. Non-hydrogen atoms were refined anisotropically, whereas all hydrogen atoms were generated by AFIX instructions. Hydrogen atoms of BH<sub>3</sub> in diphosphene–rhodium complex **7** were located from difference Fourier maps and refined isotropically. All calculations were performed using the Yadokari-XG 2009<sup>S11</sup> software package except for refinement, which was performed using SHELXL-2013.<sup>S12</sup>

Crystal data for **1** (CCDC-2301466): Crystal Size,  $0.17 \times 0.15 \times 0.10\text{ mm}$ ; Molecular formula; C<sub>45</sub>H<sub>64</sub>BP<sub>3</sub>; Molecular weight,  $M = 708.68$ ;  $T = -170\text{ }^{\circ}\text{C}$ ; triclinic;  $P-1$  (#2);  $a = 9.875(4)\text{ \AA}$ ,  $b = 12.159(4)\text{ \AA}$ ,  $c = 19.275(7)\text{ \AA}$ ,  $\alpha = 102.317(4)^{\circ}$ ,  $\beta = 101.497(4)^{\circ}$ ,  $\gamma = 100.4456(13)^{\circ}$ ,  $V = 2154.2(13)\text{ \AA}^3$ ,  $Z = 2$ ,  $D_{\text{calc}} = 1.093\text{ g cm}^{-3}$ ,  $\mu = 0.167\text{ cm}^{-1}$ ,  $2\theta_{\text{max}} = 55.0^{\circ}$ , 22513 measured reflections, 9741 independent reflections [ $R_{\text{int}} = 0.0353$ ], 526 refined parameters, Completeness to  $\theta = 99.1\%$ ,  $R_1 = 0.0437$  [ $I > 2\sigma(I)$ ],  $wR_2 = 0.1197$  (all data), GOF = 1.053, largest diff. peak/hole  $0.419/-0.229\text{ e.\AA}^{-3}$ .

Crystal data for **7** (CCDC-2301467): Crystal Size,  $0.18 \times 0.15 \times 0.05\text{ mm}$ ; Molecular formula; C<sub>59</sub>H<sub>88</sub>B<sub>2</sub>Cl<sub>6</sub>F<sub>4</sub>P<sub>3</sub>Rh; Molecular weight,  $M = 1303.43$ ;  $T = -173\text{ }^{\circ}\text{C}$ ; triclinic;  $P-1$  (#2);  $a = 10.4512(2)\text{ \AA}$ ,  $b = 13.8345(3)\text{ \AA}$ ,  $c = 23.1447(4)\text{ \AA}$ ,  $\alpha = 97.4885(16)^{\circ}$ ,  $\beta = 96.6648(17)^{\circ}$ ,  $\gamma = 101.8517(17)^{\circ}$ ,  $V = 3211.78(11)\text{ \AA}^3$ ,  $Z = 2$ ,  $D_{\text{calc}} = 1.348\text{ g cm}^{-3}$ ,  $\mu = 5.531\text{ cm}^{-1}$ ,  $2\theta_{\text{max}} = 156.0^{\circ}$ , 45374 measured reflections, 13105 independent reflections [ $R_{\text{int}} = 0.0561$ ], 704 refined parameters, Completeness to  $\theta = 99.9\%$ ,  $R_1 = 0.0527$  [ $I > 2\sigma(I)$ ],  $wR_2 = 0.1378$  (all data), GOF = 1.022, largest diff. peak/hole  $1.827/-1.248\text{ e.\AA}^{-3}$ .

**Table S2** Selected structural parameters of Mes<sup>\*</sup>-substituted diphosphenes and rhodium complex **7**.

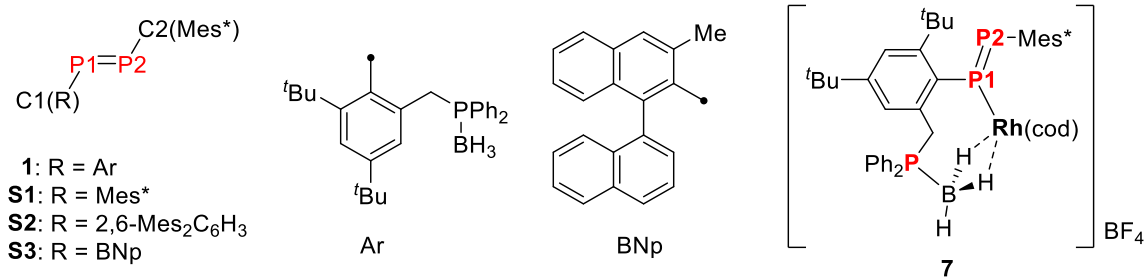

| structural parameter                                 |            |            |                       |                       |                       |
|------------------------------------------------------|------------|------------|-----------------------|-----------------------|-----------------------|
|                                                      | <b>1</b>   | <b>7</b>   | <b>S1<sup>c</sup></b> | <b>S2<sup>d</sup></b> | <b>S3<sup>e</sup></b> |
| $d(\text{P1}=\text{P2}) / \text{\AA}$                | 2.0406(8)  | 2.0414(11) | 2.034(2)              | 2.0240(13)            | 2.0323(6)             |
| $d(\text{P1}-\text{C1}) / \text{\AA}$                | 1.8598(15) | 1.850(3)   | 1.862(2)              | 1.846(3)              | 1.8523(13)            |
| $d(\text{P2}-\text{C2}) / \text{\AA}$                | 1.8593(15) | 1.852(3)   | –                     | 1.860(3)              | 1.8565(13)            |
| $d(\text{P}-\text{B}) / \text{\AA}$                  | 1.924(2)   | 1.927(4)   | –                     | –                     | –                     |
| $\text{deg}(\text{C1}-\text{P1}-\text{P2}) / ^\circ$ | 100.39(6)  | 101.80(10) | 102.8(1)              | 101.19(11)            | 98.59(4)              |
| $\text{deg}(\text{P1}-\text{P2}-\text{C2}) / ^\circ$ | 98.73(5)   | 106.15(10) | –                     | 97.99(11)             | 103.07(4)             |
| $(\text{CPP})-(\text{R}) / ^\circ$ <sup>a</sup>      | 65.2       | 76.5       | 63.9 <sup>f</sup>     | 82.5 <sup>f</sup>     | 77.0                  |
| $(\text{CPP})-(\text{Mes}^*) / ^\circ$ <sup>b</sup>  | 75.7       | 82.9       | –                     | 84.1 <sup>f</sup>     | 89.1                  |

<sup>a</sup> Dihedral angles between the CPP plane containing the C1 atom and its benzene ring of substituent R. <sup>b</sup> Dihedral angles between the CPP plane containing the C2 atom and the benzene ring of the Mes<sup>\*</sup> groups. <sup>c</sup> Ref S13. <sup>d</sup> Ref S14. <sup>e</sup> Ref S15. <sup>f</sup> Reinvestigated from information in the deposited cif files.

**Table S3** Selected structural parameters of rhodium complexes **7**, **8c**, and **9c** with bidentate ligand including a phosphinoborane moiety.

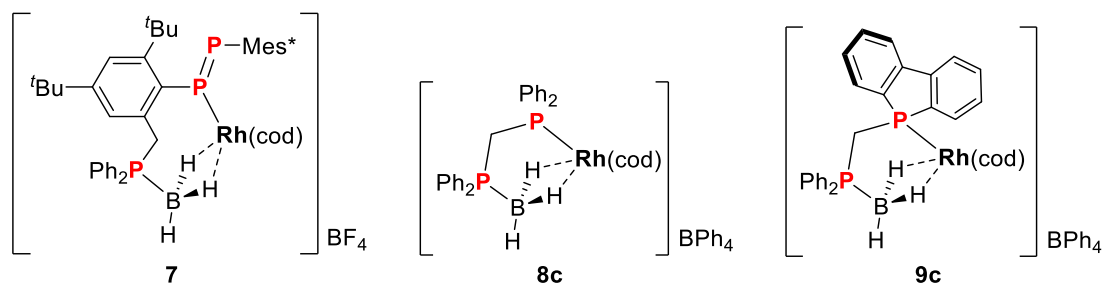

| structural parameter                                |           |                       |                       |
|-----------------------------------------------------|-----------|-----------------------|-----------------------|
|                                                     | <b>7</b>  | <b>8c<sup>a</sup></b> | <b>9c<sup>b</sup></b> |
| $d(\text{Rh}-\text{P1}) / \text{\AA}$               | 2.2694(8) | 2.2743(7)             | 2.2483(4)             |
| $d(\text{Rh}\cdots\text{B}) / \text{\AA}$           | 2.348(4)  | 2.313(3)              | 2.331(2)              |
| $d(\text{Rh}-\text{C1}) / \text{\AA}$               | 2.161(3)  | 2.124(3)              | 2.120(2)              |
| $d(\text{Rh}-\text{C2}) / \text{\AA}$               | 2.126(3)  | 2.126(3)              | 2.120(2)              |
| $d(\text{Rh}-\text{C3}) / \text{\AA}$               | 2.234(3)  | 2.249(3)              | 2.264(2)              |
| $d(\text{Rh}-\text{C4}) / \text{\AA}$               | 2.274(3)  | 2.271(3)              | 2.271(2)              |
| $d(\text{Rh}-\text{H1}) / \text{\AA}$               | 1.98(4)   | 1.82(4)               | 1.96(3)               |
| $d(\text{Rh}-\text{H2}) / \text{\AA}$               | 2.04(3)   | 1.91(3)               | 1.85(3)               |
| $d(\text{P2}-\text{B}) / \text{\AA}$                | 1.927(4)  | 1.923(3)              | 1.928(3)              |
| $d(\text{B}-\text{H1}) / \text{\AA}$                | 1.13(4)   | 1.16(3)               | 1.13(3)               |
| $d(\text{B}-\text{H2}) / \text{\AA}$                | 1.19(3)   | 1.16(3)               | 1.24(3)               |
| $d(\text{B}-\text{H3}) / \text{\AA}$                | 1.06(6)   | 1.09(3)               | 1.00(3)               |
| $\text{deg}(\text{P1}-\text{Rh}-\text{B}) / ^\circ$ | 92.97(9)  | 87.26(8)              | 87.35(4)              |

<sup>a</sup> Ref S16. <sup>b</sup> Ref S17.

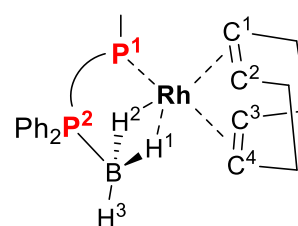

## 6. UV-vis Spectra

UV-vis spectra of **1** and **7** were measured on a JASCO V-670 spectrophotometer in dichloromethane solution (ca.  $2 \times 10^{-4}$  M) at room temperature with a 1 mm quartz cell equipped with a screw cap filled with argon. Dichloromethane (Nacalai Tesque Inc., spectral grade solvent) was dried over calcium hydride, degassed by freeze-pump-thaw cycles, distilled in a vacuum line, and stored in a glovebox. The results are shown in Fig. 3a and Table S4.

**Table S4** UV-vis spectral data of **1**, **7** and related diphosphenes.

| Compound               | $\lambda / \text{nm} (\epsilon / \text{M}^{-1} \text{cm}^{-1})$ |                         |                          |
|------------------------|-----------------------------------------------------------------|-------------------------|--------------------------|
| <b>1</b>               | 464 (400)                                                       | 338 <sup>a</sup> (4190) | 276 (10670)              |
| <b>7</b>               |                                                                 | 398 <sup>a</sup> (3840) | 300 <sup>a</sup> (13900) |
| <b>S1</b> <sup>b</sup> | 460 (1360)                                                      | 340 (7690)              | 284 (15660)              |
| <b>S3</b> <sup>c</sup> | 455 (500)                                                       | 334 (7060)              | 275 (22300)              |

<sup>a</sup> Observed as a shoulder. <sup>b</sup> Ref S13. <sup>c</sup> Ref S15.

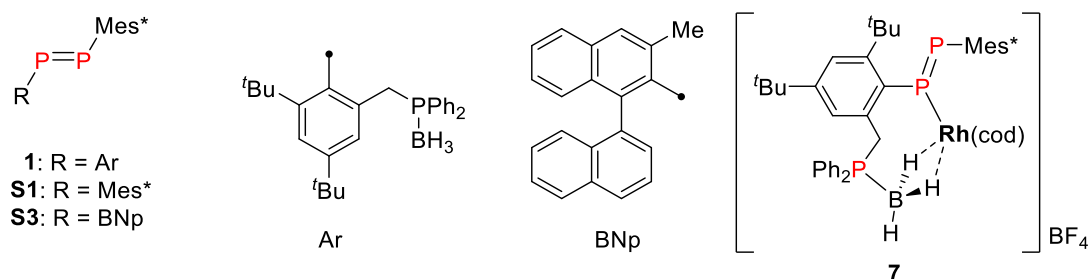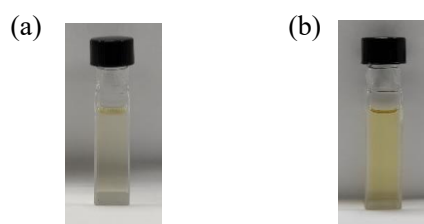

**Fig. S43** Photographs of dichloromethane solutions of (a) **1** and (b) **7**.

## 7. Theoretical Calculations

All theoretical calculations were performed using the Gaussian 09<sup>S18</sup> program on an NEC LX 110Rh-1 system of the Research Center for Computational Science, Japan. All structures were optimized without any symmetry assumptions. Zero-point energy, enthalpy, and Gibbs free energy at 298.15 K and 1 atm were estimated from the gas-phase studies. Harmonic vibration frequency calculations at the same level were performed to verify all stationary points as local minima (with no imaginary frequency). The structures of **1**, the cation moieties of **7**, **7'**, and **8c**, and cations **10** and **11** were optimized using M06<sup>S19</sup> functional with the basis set of SDD<sup>S20</sup> (Rh) and 6-31G(d) (other atoms) level. NBO calculations<sup>S21</sup> were carried out using PBE0 functional<sup>S22</sup> with the basis set of SDD (Rh) and 6-311+G(d) (other atoms) level. TD-DFT calculations of **1** and the cation moiety of **7** were performed at M06/SDD (Rh) and 6-311+G(2d,p) (other atoms) level in conjunction with the PCM model (dichloromethane)<sup>S23</sup> to evaluate solvation effects.

diphosphene-phosphineborane

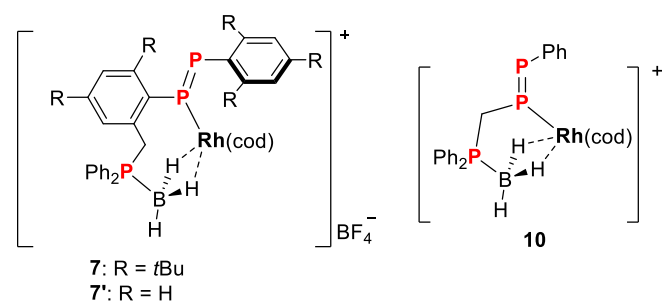

phosphine-phosphineborane

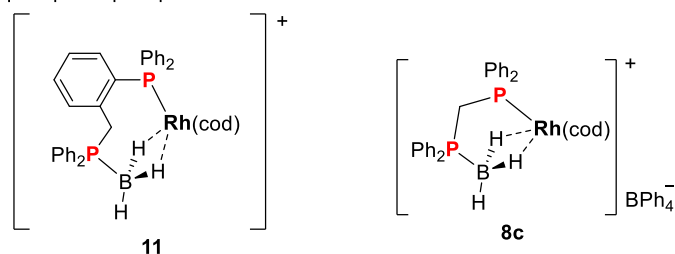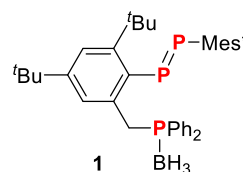

**Table S5** Uncorrected and thermal-corrected (298 K) energies of stationary points (Hartree).<sup>a</sup>

|           | <i>E</i>       | <i>E</i> + <i>ZPE</i> | <i>H</i>     | <i>G</i>     |
|-----------|----------------|-----------------------|--------------|--------------|
| <b>1</b>  | -2800.76167967 | -2799.781339          | -2799.726872 | -2799.865429 |
| <b>7</b>  | -3222.96068351 | -3221.793828          | -3221.730714 | -3221.885013 |
| <b>7'</b> | -2437.35583442 | -2436.753538          | -2436.716494 | -2436.823154 |
| <b>8c</b> | -2096.65444604 | -2096.042796          | -2096.007439 | -2096.108610 |
| <b>10</b> | -2206.48069235 | -2205.959836          | -2205.927365 | -2206.024793 |
| <b>11</b> | -2327.51461814 | -2326.820790          | -2326.780756 | -2326.892353 |

<sup>a</sup> *E*: electronic energy; *ZPE*: zero-point energy; *H* ( $= E + ZPE + E_{\text{vib}} + E_{\text{rot}} + E_{\text{trans}} + RT$ ): sum of electronic and thermal enthalpies; *G* ( $= H - TS$ ): sum of electronic and thermal free energies.

**Table S6** Selected structural parameters of rhodium complexes of bidentate ligand with a phosphinoborane moiety.

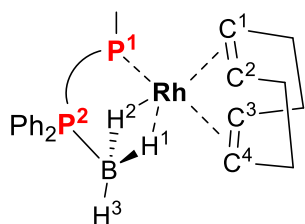

| structural parameter                      |                      |                      |                      |                      |                      |
|-------------------------------------------|----------------------|----------------------|----------------------|----------------------|----------------------|
|                                           | <b>7</b>             | <b>7'</b>            | <b>10</b>            | <b>11</b>            | <b>8c</b>            |
| $d(\text{P1-P2}) / \text{\AA}$            | 2.051                | 2.043                | 2.043                | –                    | –                    |
| $d(\text{Rh-P1}) / \text{\AA}$            | 2.345                | 2.294                | 2.310                | 2.390                | 2.324                |
| (WBI) <sup>a</sup>                        | (0.509) <sup>a</sup> | (0.558) <sup>a</sup> | (0.551) <sup>a</sup> | (0.501) <sup>a</sup> | (0.532) <sup>a</sup> |
| $d(\text{Rh}\cdots\text{B}) / \text{\AA}$ | 2.394                | 2.392                | 2.404                | 2.375                | 2.375                |
| $d(\text{Rh-C1}) / \text{\AA}$            | 2.139                | 2.154                | 2.166                | 2.142                | 2.140                |
| $d(\text{Rh-C2}) / \text{\AA}$            | 2.172                | 2.169                | 2.161                | 2.156                | 2.152                |
| $d(\text{Rh-C3}) / \text{\AA}$            | 2.286                | 2.282                | 2.275                | 2.285                | 2.282                |
| $d(\text{Rh-C4}) / \text{\AA}$            | 2.238                | 2.258                | 2.252                | 2.263                | 2.261                |
| $d(\text{Rh-H1}) / \text{\AA}$            | 2.021                | 2.046                | 2.133                | 1.955                | 2.059                |
| $d(\text{Rh-H2}) / \text{\AA}$            | 2.036                | 2.012                | 1.919                | 2.093                | 1.941                |
| $d(\text{P2-B}) / \text{\AA}$             | 1.929                | 1.932                | 1.939                | 1.919                | 1.939                |
| $d(\text{B-H1}) / \text{\AA}$             | 1.246                | 1.242                | 1.236                | 1.256                | 1.244                |
| $d(\text{B-H2}) / \text{\AA}$             | 1.240                | 1.249                | 1.261                | 1.237                | 1.254                |
| $d(\text{B-H3}) / \text{\AA}$             | 1.208                | 1.208                | 1.203                | 1.208                | 1.203                |
| $\text{deg}(\text{P1-Rh-B}) / ^\circ$     | 93.9                 | 92.3                 | 84.6                 | 96.1                 | 86.9                 |

<sup>a</sup> Wiberg bond index.

**Table S7** Natural bond orbital analysis selected for the Rh–P moiety.

| (Occupancy)                     | Bond orbital / Coefficients / Hybrids   |         |         |         |         |         |
|---------------------------------|-----------------------------------------|---------|---------|---------|---------|---------|
| <b>7</b>                        |                                         |         |         |         |         |         |
| 78. (1.59910) LP ( 1) P2        | s( 74.82%)p 0.34( 25.16%)d 0.00( 0.03%) |         |         |         |         |         |
|                                 | 0.0000                                  | 0.0000  | 0.8648  | -0.0141 | 0.0000  |         |
|                                 | 0.0000                                  | 0.0000  | -0.2092 | -0.0018 | -0.0005 |         |
|                                 | -0.0018                                 | 0.0000  | 0.0000  | 0.2554  | 0.0185  |         |
|                                 | 0.0000                                  | 0.0005  | -0.0002 | 0.0000  | 0.3758  |         |
|                                 | 0.0314                                  | -0.0002 | 0.0007  | 0.0000  | 0.0024  |         |
|                                 | 0.0012                                  | 0.0122  | -0.0074 | 0.0071  |         |         |
| <b>7'</b>                       |                                         |         |         |         |         |         |
| 59. (1.95121) BD ( 1) Rh 1 - P2 | s( 14.60%)p 0.02( 0.23%)d 5.83( 85.17%) |         |         |         |         |         |
| ( 33.82%) 0.5816*Rh             | 1                                       | 0.0000  | 0.3820  | -0.0055 | 0.0058  | -0.0003 |
|                                 |                                         | -0.0002 | 0.0000  | 0.0031  | 0.0082  | 0.0002  |
|                                 |                                         | 0.0010  | 0.0000  | -0.0003 | -0.0040 | 0.0011  |
|                                 |                                         | 0.0002  | 0.0000  | -0.0467 | -0.0051 | 0.0034  |
|                                 |                                         | 0.0001  | 0.2144  | 0.0098  | 0.0057  | -0.2229 |
|                                 |                                         | -0.0147 | -0.0138 | 0.1598  | 0.0026  | 0.0085  |
|                                 |                                         | -0.2858 | -0.0072 | -0.0119 | 0.8029  | 0.0249  |
|                                 |                                         | 0.0523  |         |         |         |         |
| ( 66.18%) 0.8135* P             | 2                                       | 0.0000  | 0.0000  | 0.6546  | 0.0372  | -0.0052 |
|                                 |                                         | 0.0007  | 0.0000  | 0.0000  | 0.1688  | 0.0083  |
|                                 |                                         | 0.0066  | -0.0031 | 0.0000  | 0.0000  | 0.0122  |
|                                 |                                         | -0.0027 | 0.0018  | 0.0000  | -0.0003 | 0.0000  |
|                                 |                                         | -0.7349 | -0.0198 | -0.0032 | -0.0039 | -0.0005 |
|                                 |                                         | -0.0153 | -0.0041 | -0.0026 | -0.0068 | 0.0213  |
| <b>10</b>                       |                                         |         |         |         |         |         |
| 52. (1.60305) LP ( 1) P2        | s( 77.58%)p 0.29( 22.37%)d 0.00( 0.05%) |         |         |         |         |         |
|                                 |                                         | 0.0000  | 0.0000  | 0.8806  | 0.0184  | 0.0002  |
|                                 |                                         | 0.0006  | 0.0000  | 0.0000  | -0.3253 | -0.0130 |
|                                 |                                         | -0.0002 | -0.0036 | -0.0001 | 0.0000  | -0.3159 |
|                                 |                                         | -0.0275 | -0.0010 | -0.0026 | -0.0001 | 0.0000  |
|                                 |                                         | 0.1296  | 0.0175  | 0.0068  | -0.0024 | -0.0004 |
|                                 |                                         | 0.0005  | -0.0021 | -0.0173 | -0.0123 | 0.0046  |
| <b>11</b>                       |                                         |         |         |         |         |         |
| 59. (1.93925) BD ( 1)Rh1- P2    | s( 13.78%)p 0.01( 0.16%)d 6.25( 86.06%) |         |         |         |         |         |
| ( 33.82%) 0.5816*Rh             | 1                                       | 0.0000  | 0.3711  | -0.0068 | -0.0055 | -0.0021 |
|                                 |                                         | 0.0005  | 0.0000  | -0.0003 | 0.0044  | 0.0000  |
|                                 |                                         | 0.0006  | 0.0000  | -0.0345 | -0.0063 | -0.0024 |
|                                 |                                         | -0.0005 | 0.0000  | -0.0144 | -0.0097 | 0.0019  |
|                                 |                                         | 0.0000  | 0.1802  | 0.0036  | 0.0090  | 0.0493  |
|                                 |                                         | -0.0001 | 0.0043  | 0.4747  | 0.0132  | 0.0299  |
|                                 |                                         | -0.7612 | -0.0196 | -0.0415 | 0.1315  | 0.0160  |
|                                 |                                         | 0.0079  |         |         |         |         |
| ( 66.18%) 0.8135* P             | 2                                       | 0.0000  | 0.0000  | 0.5671  | -0.0271 | 0.0003  |
|                                 |                                         | 0.0000  | 0.0000  | -0.0962 | 0.0080  | 0.0000  |
|                                 |                                         | -0.0004 | -0.0002 | 0.0000  | -0.6412 | 0.0482  |
|                                 |                                         | 0.0022  | -0.0010 | 0.0004  | 0.0000  | -0.5036 |
|                                 |                                         | 0.0240  | 0.0018  | 0.0013  | 0.0003  | 0.0050  |
|                                 |                                         | 0.0015  | 0.0198  | -0.0158 | 0.0016  |         |

8c

53. (1.94500) BD ( 1)Rh 1 - P2

```

( 36.82%)  0.6068*Rh  1  s( 11.99%)p 0.01(  0.15%)d 7.33( 87.87%)
    0.0000  0.3461 -0.0046  0.0051 -0.0020
-0.0009  0.0000  0.0144  0.0075  0.0001
    0.0007  0.0000 -0.0155 -0.0031  0.0012
    0.0004  0.0000 -0.0309  0.0008 -0.0010
-0.0002 -0.4279 -0.0164 -0.0250 -0.4935
-0.0160 -0.0273  0.3948  0.0101  0.0263
-0.3521 -0.0165 -0.0180  0.4104  0.0103
    0.0196
( 63.18%)  0.7948*P  2  s( 32.83%)p 2.04( 67.08%)d 0.00(  0.09%)
    0.0000  0.0000  0.5722  0.0289  0.0001
    0.0000  0.0000  0.3574  -0.0144  -0.0001
    0.0022  -0.0001  0.0000  -0.4207  0.0271
    0.0009  0.0008  0.0005  0.0000  -0.6029
    0.0403  0.0023  -0.0012  0.0004  -0.0110
-0.0162  0.0204  -0.0054  0.0110

```

**Table S8.** Transition energies, wavelengths, and oscillator strengths (*f*) of the transitions of **1** and **7** longer than 290 nm (8 states for **1** and 19 states for **7**).

**1:** The 192nd orbital is the HOMO, and the 193rd orbital is the LUMO.

|                              |                              |          |
|------------------------------|------------------------------|----------|
| Excited State 1: Singlet-A   | 190 -> 193                   | -0.17635 |
| 2.4665 eV 502.67 nm f=0.0281 | Excited State 5: Singlet-A   |          |
| 191 -> 193 0.17702           | 3.5844 eV 345.90 nm f=0.0152 |          |
| 192 -> 193 0.67351           | 188 -> 193 0.64305           |          |
| Excited State 2: Singlet-A   | 189 -> 193 -0.18694          |          |
| 3.2650 eV 379.74 nm f=0.0630 | 190 -> 193 -0.20033          |          |
| 188 -> 193 -0.10286          | Excited State 6: Singlet-A   |          |
| 189 -> 193 -0.12482          | 3.9105 eV 317.05 nm f=0.0190 |          |
| 190 -> 193 -0.36717          | 183 -> 193 -0.10257          |          |
| 191 -> 193 0.56411           | 185 -> 193 0.13539           |          |
| 192 -> 193 -0.10478          | 186 -> 193 0.44066           |          |
| Excited State 3: Singlet-A   | 187 -> 193 0.45565           |          |
| 3.4416 eV 360.26 nm f=0.0974 | 189 -> 193 -0.13173          |          |
| 186 -> 193 0.10596           | 191 -> 193 -0.12547          |          |
| 187 -> 193 0.10243           | Excited State 7: Singlet-A   |          |
| 188 -> 193 0.21483           | 4.2002 eV 295.19 nm f=0.3242 |          |
| 190 -> 193 0.52311           | 192 -> 194 0.22704           |          |
| 191 -> 193 0.34458           | 192 -> 195 0.49943           |          |
| 192 -> 193 -0.15739          | 192 -> 197 -0.39972          |          |
| Excited State 4: Singlet-A   | Excited State 8: Singlet-A   |          |
| 3.5457 eV 349.67 nm f=0.0237 | 4.2525 eV 291.56 nm f=0.0031 |          |
| 187 -> 193 0.10584           | 183 -> 193 0.13586           |          |
| 188 -> 193 0.14442           | 186 -> 193 -0.45398          |          |
| 189 -> 193 0.64994           | 187 -> 193 0.50501           |          |

**7:** The 230th orbital is the HOMO, and the 231st orbital is the LUMO.

|                              |                              |
|------------------------------|------------------------------|
| Excited State 1: Singlet-A   | 2.6425 eV 469.19 nm f=0.0033 |
| 2.4924 eV 497.45 nm f=0.0084 | 228 -> 231 -0.16697          |
| 228 -> 231 -0.13286          | 228 -> 232 -0.15791          |
| 228 -> 232 -0.15575          | 229 -> 231 -0.37717          |
| 229 -> 231 0.11818           | 230 -> 231 -0.26908          |
| 230 -> 231 0.57648           | 230 -> 232 0.45301           |
| 230 -> 232 0.30891           | Excited State 3: Singlet-A   |
| Excited State 2: Singlet-A   | 2.8159 eV 440.31 nm f=0.0113 |



|                  |           |                   |                   |           |
|------------------|-----------|-------------------|-------------------|-----------|
| 228 -> 231       | 0.29679   | 3.4227 eV         | 362.24 nm         | f=0.0022  |
| 228 -> 232       | -0.18241  | 224 -> 231        |                   | -0.14846  |
| 229 -> 231       | 0.43986   | 225 -> 231        |                   | -0.11846  |
| 229 -> 232       | 0.11651   | 226 -> 231        |                   | 0.60085   |
| 230 -> 231       | -0.23136  | 227 -> 231        |                   | -0.30300  |
| 230 -> 232       | 0.29172   | Excited State 10: | Singlet-A         |           |
| Excited State 4: | Singlet-A | 3.4970 eV         | 354.54 nm         | f=0.0649  |
| 2.9060 eV        | 426.65 nm | f=0.0326          | 218 -> 232        | -0.10664  |
| 219 -> 232       | -0.10328  | 223 -> 231        |                   | -0.10212  |
| 223 -> 232       | 0.14406   | 223 -> 232        |                   | 0.23199   |
| 227 -> 231       | -0.14761  | 224 -> 231        |                   | 0.27023   |
| 227 -> 232       | -0.12050  | 225 -> 231        |                   | 0.42808   |
| 228 -> 231       | 0.44636   | 225 -> 232        |                   | -0.15987  |
| 228 -> 232       | 0.20619   | 226 -> 231        |                   | 0.20265   |
| 229 -> 231       | -0.12008  | 226 -> 232        |                   | -0.10288  |
| 229 -> 232       | -0.32102  | 227 -> 232        |                   | -0.13832  |
| 230 -> 232       | 0.12243   | 229 -> 232        |                   | 0.16637   |
| Excited State 5: | Singlet-A | Excited State 11: | Singlet-A         |           |
| 3.0682 eV        | 404.10 nm | f=0.0085          | 3.5587 eV         | 348.39 nm |
| 219 -> 232       | -0.12988  | 223 -> 231        |                   | 0.59368   |
| 223 -> 232       | 0.18079   | 223 -> 232        |                   | -0.12925  |
| 226 -> 231       | 0.21609   | 224 -> 231        |                   | 0.26100   |
| 226 -> 232       | 0.16882   | 228 -> 232        |                   | -0.11028  |
| 227 -> 231       | 0.41091   | Excited State 12: | Singlet-A         |           |
| 227 -> 232       | 0.21947   | 3.5887 eV         | 345.49 nm         | f=0.0022  |
| 228 -> 231       | -0.12687  | 223 -> 231        |                   | -0.15091  |
| 228 -> 232       | 0.27965   | 224 -> 231        |                   | 0.52665   |
| Excited State 6: | Singlet-A | 225 -> 231        |                   | -0.42433  |
| 3.1452 eV        | 394.21 nm | f=0.0487          | Excited State 13: | Singlet-A |
| 223 -> 231       | -0.14469  | 3.8110 eV         | 325.33 nm         | f=0.0333  |
| 223 -> 232       | -0.27097  | 228 -> 233        |                   | -0.13770  |
| 226 -> 231       | 0.13175   | 230 -> 233        |                   | 0.56723   |
| 227 -> 231       | 0.26854   | 230 -> 237        |                   | 0.23566   |
| 227 -> 232       | 0.17617   | Excited State 14: | Singlet-A         |           |
| 228 -> 231       | 0.32784   | 3.9643 eV         | 312.75 nm         | f=0.1898  |
| 228 -> 232       | -0.23158  | 223 -> 232        |                   | -0.18237  |
| 229 -> 231       | -0.23555  | 224 -> 232        |                   | 0.14146   |
| 230 -> 231       | 0.10155   | 225 -> 232        |                   | 0.19572   |
| 230 -> 232       | -0.11009  | 228 -> 232        |                   | 0.37062   |
| Excited State 7: | Singlet-A | 229 -> 232        |                   | 0.30624   |
| 3.2298 eV        | 383.87 nm | f=0.0488          | 230 -> 232        | 0.23447   |
| 218 -> 232       | -0.11817  | Excited State 15: | Singlet-A         |           |
| 223 -> 231       | 0.14482   | 3.9962 eV         | 310.26 nm         | f=0.0053  |
| 223 -> 232       | 0.22555   | 217 -> 231        |                   | 0.18366   |
| 224 -> 231       | -0.10594  | 218 -> 231        |                   | 0.26447   |
| 224 -> 232       | -0.11727  | 219 -> 231        |                   | 0.32764   |
| 225 -> 231       | -0.20538  | 220 -> 231        |                   | 0.27944   |
| 225 -> 232       | -0.12334  | 221 -> 231        |                   | 0.29522   |
| 227 -> 231       | -0.11879  | 222 -> 231        |                   | 0.22369   |
| 227 -> 232       | 0.23784   | 223 -> 232        |                   | 0.10055   |
| 228 -> 231       | 0.11963   | Excited State 16: | Singlet-A         |           |
| 229 -> 231       | -0.22220  | 4.0729 eV         | 304.41 nm         | f=0.0327  |
| 229 -> 232       | 0.36637   | 217 -> 231        |                   | 0.15459   |
| Excited State 8: | Singlet-A | 218 -> 231        |                   | 0.35260   |
| 3.3527 eV        | 369.80 nm | f=0.0023          | 222 -> 231        | -0.11726  |
| 223 -> 231       | -0.16066  | 223 -> 232        |                   | -0.10612  |
| 224 -> 231       | 0.16169   | 228 -> 232        |                   | 0.10196   |
| 225 -> 231       | 0.23240   | 228 -> 233        |                   | -0.15154  |
| 226 -> 232       | 0.24238   | 229 -> 233        |                   | 0.44030   |
| 227 -> 231       | -0.33986  | Excited State 17: | Singlet-A         |           |
| 227 -> 232       | 0.39020   | 4.1457 eV         | 299.06 nm         | f=0.0258  |
| 228 -> 232       | 0.10521   | 217 -> 231        |                   | 0.11617   |
| Excited State 9: | Singlet-A | 218 -> 231        |                   | 0.33588   |

|                   |                    |                   |                    |
|-------------------|--------------------|-------------------|--------------------|
| 219 -> 231        | -0.13835           | 222 -> 231        | 0.51703            |
| 221 -> 231        | -0.12919           | 228 -> 233        | -0.10675           |
| 222 -> 231        | -0.19220           | Excited State 19: | Singlet-A          |
| 228 -> 233        | 0.26837            | 4.2609 eV         | 290.98 nm f=0.1067 |
| 229 -> 232        | 0.16068            | 222 -> 231        | 0.18687            |
| 229 -> 233        | -0.32153           | 226 -> 232        | -0.18777           |
| Excited State 18: | Singlet-A          | 227 -> 232        | 0.14672            |
| 4.2067 eV         | 294.73 nm f=0.0032 | 228 -> 233        | 0.36091            |
| 216 -> 231        | -0.21211           | 229 -> 233        | 0.18093            |
| 218 -> 231        | 0.18585            | 230 -> 233        | 0.25823            |
| 219 -> 231        | -0.17663           | 230 -> 235        | -0.20875           |
| 220 -> 231        | -0.20705           | 230 -> 237        | -0.17122           |

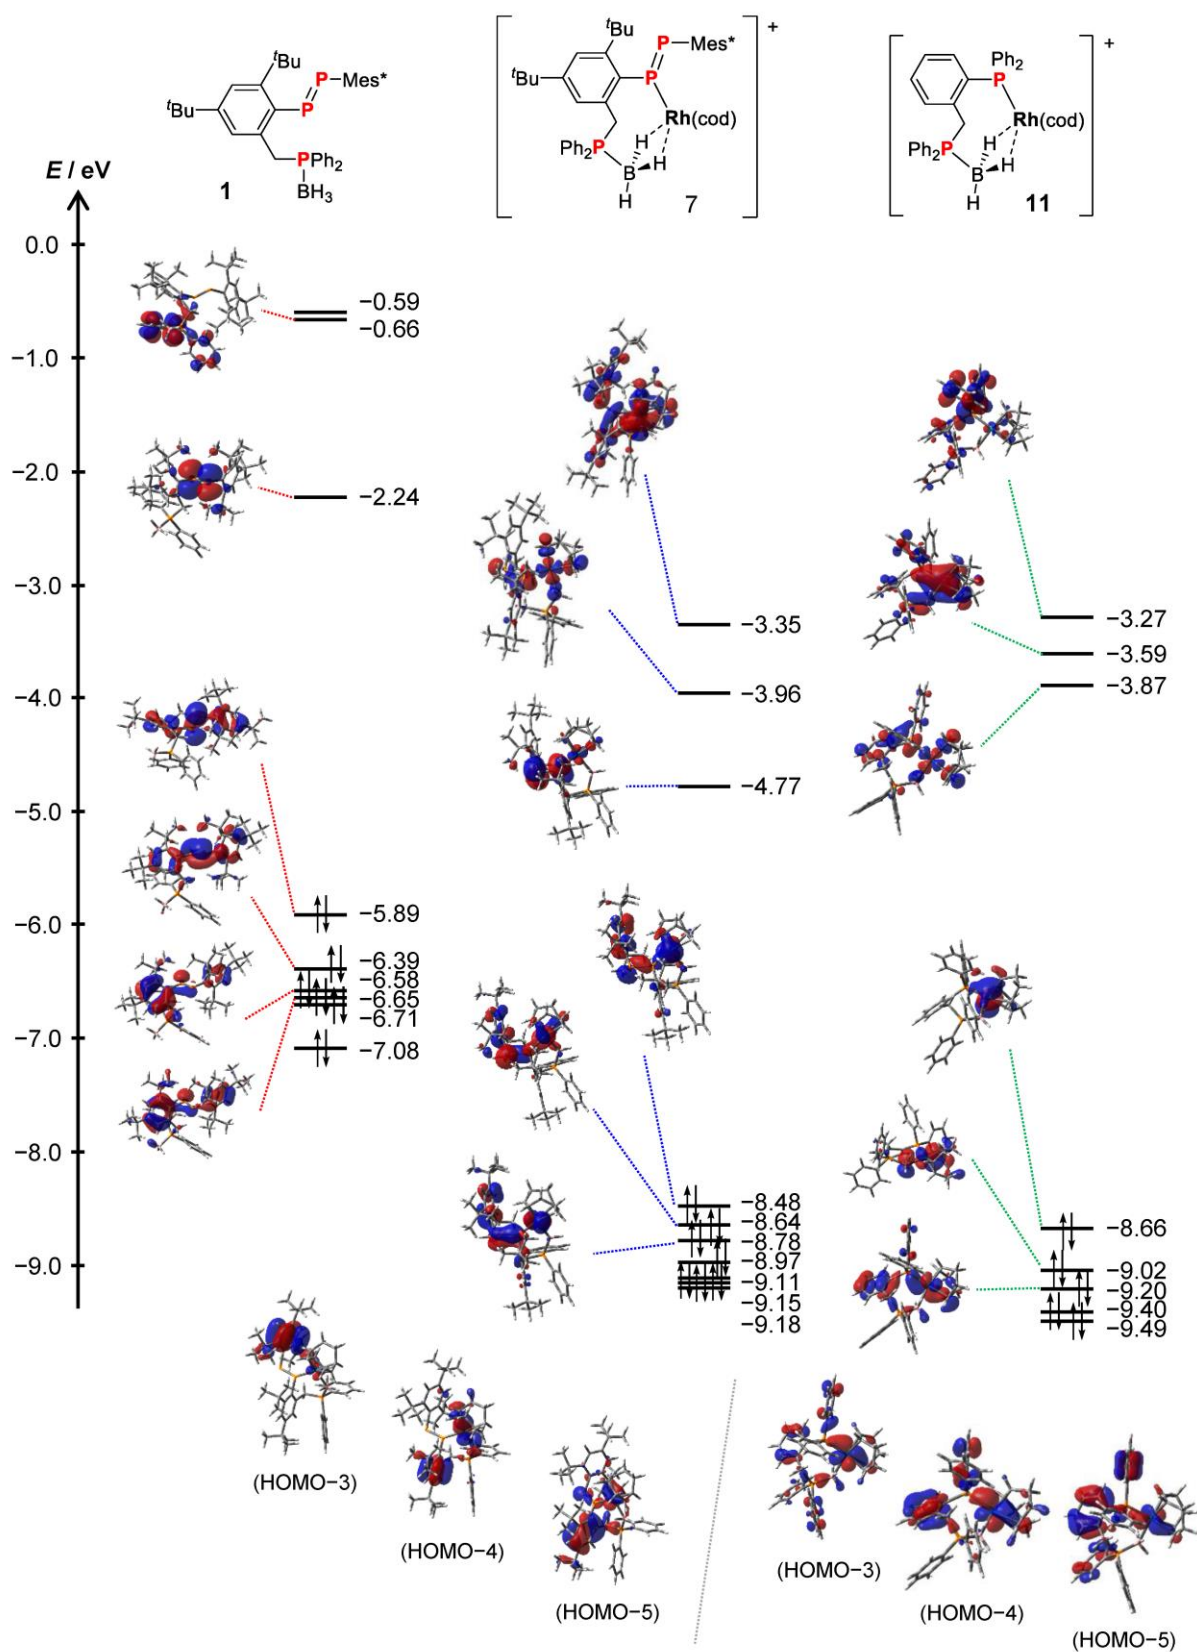

Fig. S44 Energy diagram of 1, 7<sup>+</sup> and 11<sup>+</sup> (Isovalue = 0.03).

**Table S9** Atomic coordinates of the optimized structures.

**1**

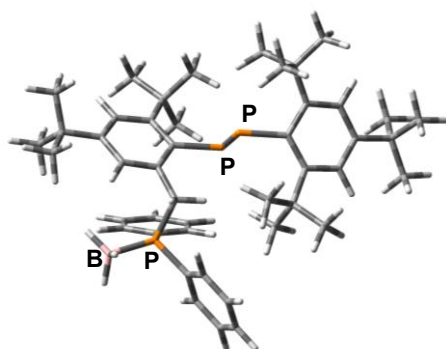

|   |             |             |             |
|---|-------------|-------------|-------------|
| P | 1.10794900  | -0.95508300 | -1.36284600 |
| P | 0.27268600  | -0.79989000 | 0.51064500  |
| P | -2.85940600 | 2.26910100  | -0.31968300 |
| C | 2.87558500  | -0.53563400 | -0.93038700 |
| C | -1.49373600 | -1.21021000 | 0.06706200  |
| C | -2.19764700 | -0.37342200 | -0.82541600 |
| C | 4.47892500  | 0.94570600  | 0.10781300  |
| H | 4.75677600  | 1.94733700  | 0.42056100  |
| C | 4.98937800  | -1.35625800 | -0.09889500 |
| H | 5.69109800  | -2.17093300 | 0.05109700  |
| C | -1.77038600 | 1.02659300  | -1.17199000 |
| H | -1.86815400 | 1.21517000  | -2.25173200 |
| H | -0.73774900 | 1.25042000  | -0.89033300 |
| C | -3.41566200 | -2.67449400 | 0.05640700  |
| H | -3.92715600 | -3.55807200 | 0.42638900  |
| C | 3.81356000  | -1.60534400 | -0.79964700 |
| C | -4.06587100 | -1.92064800 | -0.92460600 |
| C | -3.44014800 | -0.75696400 | -1.33475300 |
| H | -3.92394000 | -0.08945700 | -2.04536200 |
| C | 3.28136300  | 0.78207300  | -0.60119800 |
| C | -1.88954700 | 3.80782600  | -0.42461200 |
| C | 5.31963800  | -0.10741300 | 0.42697100  |
| C | -5.43730700 | -2.34439400 | -1.43881000 |
| C | -2.15957000 | -2.36398700 | 0.57565700  |
| C | -1.25383500 | 4.13494300  | -1.62606400 |
| H | -1.31136000 | 3.45917500  | -2.47983800 |
| C | 2.55166600  | 2.08273200  | -1.01474900 |
| C | 1.73909700  | 1.92406600  | -2.30464400 |
| H | 0.87824900  | 1.24994300  | -2.21973500 |
| H | 2.37108200  | 1.54433900  | -3.11979200 |
| H | 1.34057500  | 2.90238800  | -2.60906900 |
| C | -5.91318900 | -1.46832300 | -2.59637900 |
| H | -6.04038700 | -0.41916900 | -2.29555700 |
| H | -6.88671500 | -1.82964200 | -2.95488100 |
| H | -5.21368800 | -1.50125300 | -3.44352800 |
| C | -6.45118500 | -2.21910500 | -0.29552000 |
| H | -6.17998500 | -2.84856000 | 0.56275000  |
| H | -7.45124000 | -2.52455900 | -0.63575700 |
| H | -6.51307400 | -1.17833800 | 0.05279900  |
| C | -5.38949800 | -3.79571700 | -1.92787300 |
| H | -4.65834200 | -3.91251000 | -2.73951000 |

|   |             |             |             |
|---|-------------|-------------|-------------|
| H | -6.37433300 | -4.09740700 | -2.31180600 |
| H | -5.11877600 | -4.49813000 | -1.12893700 |
| C | -1.83248600 | 4.70878400  | 0.64097600  |
| H | -2.33923900 | 4.47494600  | 1.57686900  |
| C | -0.54667100 | 5.32570500  | -1.74822100 |
| H | -0.05091900 | 5.56524000  | -2.68800100 |
| C | 1.67092000  | 2.61292000  | 0.12250900  |
| H | 1.18828800  | 3.55858500  | -0.16833700 |
| H | 2.27289900  | 2.79621100  | 1.02345300  |
| H | 0.88699800  | 1.89610900  | 0.39570200  |
| C | 3.64010700  | -2.99320600 | -1.45995900 |
| C | -0.47676900 | 6.20801000  | -0.67418700 |
| H | 0.07720500  | 7.14028000  | -0.76859200 |
| C | 6.59590400  | 0.05962200  | 1.24705700  |
| C | -1.59509200 | -3.24706200 | 1.70581700  |
| C | 3.57310600  | 3.18829900  | -1.34525300 |
| H | 3.03949200  | 4.05202000  | -1.76647300 |
| H | 4.31095400  | 2.84810200  | -2.08438400 |
| H | 4.11396200  | 3.55795700  | -0.46614300 |
| C | -0.30249200 | -3.95500900 | 1.28592600  |
| H | -0.44248100 | -4.50653500 | 0.34502100  |
| H | 0.00240700  | -4.67317600 | 2.06079000  |
| H | 0.53177100  | -3.25771800 | 1.14677700  |
| C | -1.12667900 | 5.90060100  | 0.51678400  |
| H | -1.08539000 | 6.59232200  | 1.35619300  |
| C | -2.83310300 | 1.75652400  | 1.42458000  |
| C | -4.00864100 | 1.23958400  | 1.97269300  |
| H | -4.91316300 | 1.21250800  | 1.36606100  |
| C | -2.57171600 | -4.35070100 | 2.12822600  |
| H | -2.76636700 | -5.06948000 | 1.32047400  |
| H | -3.53199100 | -3.94793800 | 2.47763700  |
| H | -2.12957400 | -4.91127700 | 2.96226500  |
| C | -1.34979900 | -2.38813000 | 2.95374300  |
| H | -1.02749200 | -3.02395600 | 3.79110100  |
| H | -2.27046200 | -1.86470400 | 3.24947800  |
| H | -0.57085000 | -1.63045300 | 2.80137700  |
| C | 2.56978800  | -3.85273100 | -0.77730300 |
| H | 2.74491500  | -3.90729400 | 0.30688200  |
| H | 2.60155200  | -4.87607700 | -1.17871500 |
| H | 1.55363300  | -3.47443300 | -0.93664300 |
| C | 3.30925400  | -2.82145300 | -2.94953900 |
| H | 3.23758800  | -3.80677600 | -3.43181300 |
| H | 4.09814400  | -2.25013500 | -3.45780300 |
| H | 2.35494600  | -2.30852300 | -3.12108200 |
| C | -1.66965200 | 1.79138300  | 2.20062800  |
| H | -0.74426900 | 2.19705600  | 1.78864100  |
| C | 4.93680000  | -3.81255600 | -1.41066500 |
| H | 5.20893600  | -4.10746400 | -0.38828800 |
| H | 5.78502000  | -3.27698300 | -1.85806200 |
| H | 4.79069900  | -4.73817900 | -1.98252300 |
| C | 6.77077000  | 1.48548400  | 1.76514600  |
| H | 5.92247000  | 1.79825200  | 2.38964200  |
| H | 6.88144400  | 2.20985800  | 0.94645900  |
| H | 7.67798300  | 1.54557700  | 2.38139600  |

|   |             |             |             |
|---|-------------|-------------|-------------|
| B | -4.61963700 | 2.53212800  | -1.08059300 |
| H | -5.27330700 | 1.52080800  | -0.92543400 |
| H | -4.36438100 | 2.77922400  | -2.24536500 |
| H | -5.04333000 | 3.48906700  | -0.46366600 |
| C | 7.81253400  | -0.28447100 | 0.37964600  |
| H | 7.86361500  | 0.37279700  | -0.49933300 |
| H | 7.78466700  | -1.32175000 | 0.02074300  |
| H | 8.74083600  | -0.15691400 | 0.95517800  |
| C | 6.54854800  | -0.87929800 | 2.45808600  |

|   |             |             |            |
|---|-------------|-------------|------------|
| H | 7.46071800  | -0.76724700 | 3.06154700 |
| H | 6.47397600  | -1.93368300 | 2.16294300 |
| H | 5.68556900  | -0.64855200 | 3.09745200 |
| C | -4.02154400 | 0.76799500  | 3.28216900 |
| H | -4.94319300 | 0.37047200  | 3.70343700 |
| C | -1.68525500 | 1.32050400  | 3.50713600 |
| H | -0.77429700 | 1.34695000  | 4.10257200 |
| C | -2.86274300 | 0.81046600  | 4.04903200 |
| H | -2.87342900 | 0.44187000  | 5.07365800 |

7

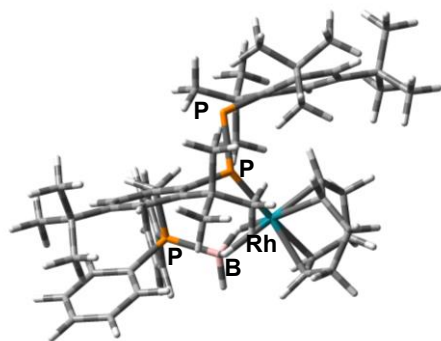

|    |             |             |             |
|----|-------------|-------------|-------------|
| Rh | -0.59672700 | 0.48341700  | 1.82828200  |
| P  | -0.16747900 | -0.85112800 | -0.05186100 |
| P  | 2.58226800  | 1.92273400  | 0.06680100  |
| P  | -1.04785500 | -1.40025900 | -1.82112600 |
| C  | -1.09991500 | 1.08331600  | -3.57397800 |
| H  | -0.30488400 | 0.49943100  | -3.09336900 |
| H  | -0.59607800 | 1.89373700  | -4.12005600 |
| H  | -1.58385400 | 0.43611000  | -4.31895100 |
| C  | -1.18825300 | 1.95198500  | 3.47686600  |
| H  | -0.58634700 | 2.82808200  | 3.22940500  |
| C  | 2.48008700  | 3.61637900  | -0.56964400 |
| C  | -1.41111200 | 2.51980900  | -1.53502700 |
| H  | -2.13285900 | 3.05663900  | -0.90207700 |
| H  | -0.75278300 | 3.27205900  | -1.99701800 |
| H  | -0.80820700 | 1.89131800  | -0.86453500 |
| C  | -2.12419900 | 1.68662100  | -2.60627200 |
| C  | 1.25037700  | -3.84192900 | 0.86038000  |
| C  | -5.28788600 | 0.33660700  | -0.97040200 |
| C  | -2.77647800 | -0.73026300 | -1.71857100 |
| C  | 2.43358400  | -0.61854900 | -0.99974000 |
| C  | 4.21216900  | -2.27123700 | -0.98664800 |
| C  | 1.56240300  | -1.48232300 | -0.29557100 |
| C  | -3.84190600 | -1.61317700 | -1.34716700 |
| C  | 2.04842400  | -2.75657700 | 0.11194200  |
| C  | -4.29077600 | 1.14015900  | -1.50256900 |
| H  | -4.48173900 | 2.20452000  | -1.59496500 |
| C  | 3.35314500  | -3.09337300 | -0.25924900 |
| H  | 3.72869300  | -4.07160900 | 0.02675400  |
| C  | 1.94948700  | 5.22873800  | -2.28893100 |
| H  | 1.60033300  | 5.44926200  | -3.29575400 |
| C  | 4.32835400  | 1.59454000  | 0.40665300  |
| C  | -5.05242900 | -1.03746900 | -0.96930600 |
| H  | -5.86372100 | -1.68686500 | -0.65660600 |
| C  | 2.10401400  | 0.81180600  | -1.32825000 |

|   |             |             |             |
|---|-------------|-------------|-------------|
| H | 1.03971600  | 0.99216200  | -1.52786600 |
| H | 2.66689700  | 1.13524200  | -2.21533000 |
| C | 3.72216600  | -1.02470300 | -1.34456100 |
| H | 4.35023800  | -0.32111600 | -1.88915000 |
| C | 4.66382200  | 0.68568500  | 1.41381400  |
| H | 3.87923200  | 0.22166000  | 2.01275500  |
| C | 2.77285600  | 5.97791400  | -0.14903400 |
| H | 3.06616200  | 6.78609700  | 0.51772300  |
| C | -3.05142800 | 0.64847700  | -1.93054400 |
| C | 5.33332700  | 2.18232400  | -0.36871800 |
| H | 5.07443500  | 2.89807900  | -1.14994300 |
| C | -3.04605900 | -3.70373400 | -2.58332700 |
| H | -3.12769800 | -4.79861600 | -2.60807500 |
| H | -1.97404800 | -3.47553700 | -2.61173600 |
| H | -3.49727100 | -3.31047000 | -3.50455000 |
| C | -3.10480100 | -3.66993300 | -0.06032600 |
| H | -3.67654500 | -3.34653400 | 0.82251200  |
| H | -2.07536600 | -3.31118300 | 0.04886400  |
| H | -3.07254700 | -4.76941100 | -0.05804100 |
| C | 0.50944600  | -4.69574000 | -0.17812700 |
| H | 1.22318400  | -5.19666700 | -0.84593200 |
| H | -0.15963500 | -4.09283500 | -0.80622700 |
| H | -0.09292500 | -5.46960500 | 0.32011800  |
| C | -6.63205900 | 0.88798000  | -0.50716600 |
| C | -3.76930000 | -3.15986000 | -1.34393400 |
| C | 2.02913100  | 3.90700100  | -1.85963900 |
| H | 1.73214700  | 3.10901800  | -2.53994200 |
| C | -2.27698400 | -0.73748700 | 2.46500700  |
| H | -2.23730400 | -1.69138900 | 1.93626500  |
| C | 2.85060200  | 4.66141100  | 0.28586400  |
| H | 3.20838200  | 4.44144200  | 1.29240100  |
| C | -2.37909800 | -0.86943800 | 3.97372100  |
| H | -3.29953000 | -0.38473600 | 4.32742100  |
| H | -2.49138400 | -1.93135000 | 4.22771200  |
| C | -2.72789900 | 0.35546900  | 1.69724500  |
| H | -2.97785200 | 0.14524600  | 0.65331300  |
| C | 2.32115500  | 6.26199800  | -1.43587400 |
| H | 2.26148700  | 7.29430100  | -1.77467900 |
| C | -5.16948100 | -3.79298100 | -1.38925100 |
| H | -5.76180500 | -3.42397100 | -2.23722700 |
| H | -5.74248400 | -3.63524000 | -0.46691600 |
| H | -5.06192700 | -4.87890300 | -1.50551400 |
| C | 6.66538100  | 1.86176000  | -0.13459700 |
| H | 7.44797700  | 2.32343200  | -0.73322400 |
| C | 5.61825300  | -2.74699300 | -1.33456300 |
| C | -7.04852000 | 0.23814900  | 0.81702700  |

|   |             |             |             |
|---|-------------|-------------|-------------|
| H | -6.29122700 | 0.40237100  | 1.59789200  |
| H | -7.20398500 | -0.84402600 | 0.72580200  |
| H | -7.99462500 | 0.67251300  | 1.16743700  |
| C | -2.68207900 | 2.15283900  | 3.49207800  |
| H | -3.11809600 | 1.66448300  | 4.37257000  |
| H | -2.89702200 | 3.22289100  | 3.60413000  |
| C | -0.52263100 | 0.87225100  | 4.03142200  |
| H | 0.54752300  | 0.99674900  | 4.21518300  |
| C | -1.14822700 | -0.32056700 | 4.70132600  |
| H | -1.38761100 | -0.07585100 | 5.75002700  |
| H | -0.38298100 | -1.10766200 | 4.74454300  |
| C | 6.99641600  | 0.95749000  | 0.87262300  |
| H | 8.04055200  | 0.71299700  | 1.05961400  |
| C | 0.26159300  | -3.27066300 | 1.87500700  |
| H | -0.55885700 | -2.72066800 | 1.40540800  |
| H | 0.75536100  | -2.58976700 | 2.58497900  |
| H | -0.20143200 | -4.08886200 | 2.44465800  |
| C | -6.59314300 | 2.40130800  | -0.29668100 |
| H | -5.81358400 | 2.69254500  | 0.42288500  |
| H | -7.55780300 | 2.74395100  | 0.09988500  |
| H | -6.41908700 | 2.94869200  | -1.23284000 |
| C | 6.37338400  | -3.08831100 | -0.04396300 |
| H | 7.39442800  | -3.41747500 | -0.28173800 |
| H | 5.89060100  | -3.89499500 | 0.52270400  |
| H | 6.44327100  | -2.20750900 | 0.61080800  |
| C | -7.68498300 | 0.57304100  | -1.57801200 |
| H | -8.66692800 | 0.96147000  | -1.27272500 |

|   |             |             |             |
|---|-------------|-------------|-------------|
| H | -7.78687900 | -0.50792000 | -1.74256500 |
| H | -7.41952900 | 1.03614200  | -2.53829500 |
| C | 5.99803200  | 0.37077100  | 1.64616000  |
| H | 6.26017000  | -0.32842100 | 2.43819400  |
| C | -2.95658500 | 2.64548900  | -3.48069900 |
| H | -3.58432200 | 2.09368500  | -4.19290100 |
| H | -2.28016000 | 3.29067300  | -4.05645900 |
| H | -3.60389600 | 3.31410100  | -2.90242200 |
| C | -3.32949100 | 1.63750900  | 2.20570500  |
| H | -3.20476200 | 2.39370000  | 1.41409900  |
| H | -4.41978000 | 1.51961500  | 2.33826900  |
| C | 6.41702900  | -1.68113000 | -2.08179000 |
| H | 5.94801400  | -1.41147700 | -3.03846600 |
| H | 7.42027800  | -2.06583700 | -2.30719800 |
| H | 6.53999500  | -0.76593700 | -1.48298400 |
| C | 2.16917700  | -4.77588800 | 1.66549200  |
| H | 1.55221300  | -5.44084200 | 2.28329100  |
| H | 2.83389000  | -4.21422200 | 2.33651600  |
| H | 2.78436500  | -5.42847000 | 1.03491200  |
| C | 5.52578200  | -3.99383200 | -2.22212500 |
| H | 4.98848600  | -3.77541700 | -3.15505400 |
| H | 5.00772700  | -4.82180100 | -1.72075300 |
| H | 6.53332200  | -4.34482700 | -2.48500200 |
| H | 0.35233200  | 2.15246400  | 1.15059500  |
| H | 1.41804900  | 0.54694300  | 1.97142800  |
| H | 1.83827600  | 2.45754800  | 2.48171500  |
| B | 1.42981100  | 1.73733200  | 1.60198800  |

7'

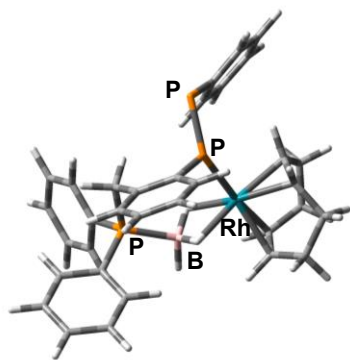

|    |             |             |             |
|----|-------------|-------------|-------------|
| Rh | -1.36241500 | -0.75904600 | 0.88378300  |
| P  | -1.03653900 | -0.62193300 | -1.38282900 |
| P  | 2.27813600  | 0.60953500  | 0.19062700  |
| P  | -1.80568400 | 0.39042100  | -2.98203100 |
| C  | -1.97941400 | -0.46655600 | 3.06156400  |
| H  | -1.34205700 | 0.37304900  | 3.34915300  |
| C  | 2.60406400  | 2.36472500  | 0.49426300  |
| C  | -4.95741100 | 3.02689600  | -0.86764800 |
| C  | -3.02968500 | 1.43263900  | -2.11075700 |
| C  | 1.69204000  | -0.97194100 | -2.03613100 |
| C  | 2.57625700  | -3.09117600 | -2.82549200 |
| C  | 0.40573200  | -1.54447500 | -2.00832300 |
| C  | -4.35390400 | 1.42987900  | -2.56974700 |
| C  | 0.22286400  | -2.87718500 | -2.39042500 |
| C  | -3.63561300 | 3.06592600  | -0.42969300 |

|   |             |             |             |
|---|-------------|-------------|-------------|
| H | -3.35108600 | 3.72032200  | 0.39280200  |
| C | 1.30246600  | -3.64836100 | -2.80385900 |
| H | 1.14747500  | -4.68094200 | -3.10917200 |
| C | 2.67721300  | 4.68056700  | -0.18756500 |
| H | 2.54792500  | 5.43844300  | -0.95750500 |
| C | 3.83768700  | -0.27266400 | 0.43507400  |
| C | -5.31518000 | 2.21060100  | -1.93860800 |
| H | -6.34495600 | 2.19033600  | -2.28949800 |
| C | 1.94276600  | 0.45070900  | -1.61902300 |
| H | 1.08936000  | 1.10069200  | -1.85866900 |
| H | 2.82217600  | 0.85648600  | -2.14009900 |
| C | 2.76478400  | -1.76733100 | -2.44435700 |
| H | 3.76591000  | -1.33478500 | -2.46687400 |
| C | 3.82684200  | -1.58225300 | 0.92091100  |
| H | 2.88811800  | -2.04479300 | 1.22581400  |
| C | 3.25462700  | 4.07244300  | 2.07426700  |
| H | 3.57633100  | 4.35691900  | 3.07392500  |
| C | -2.67442400 | 2.27031200  | -1.04304700 |
| C | 5.04354600  | 0.31752200  | 0.03933700  |
| H | 5.05639800  | 1.34425500  | -0.32910000 |
| C | 2.43574600  | 3.34296600  | -0.48864200 |
| H | 2.12279800  | 3.07572900  | -1.49684300 |
| C | -3.08034600 | -2.06865600 | 0.68440000  |
| H | -3.00274700 | -2.56382800 | -0.28735100 |
| C | 3.01260900  | 2.73714500  | 1.78134500  |
| H | 3.14944200  | 1.97739600  | 2.55195700  |
| C | -3.25332700 | -3.00759700 | 1.86421400  |

|   |             |             |             |
|---|-------------|-------------|-------------|
| H | -4.15767500 | -2.72890700 | 2.42208000  |
| H | -3.43856500 | -4.02184700 | 1.48959400  |
| C | -3.50462600 | -0.72365900 | 0.66510100  |
| H | -3.74709700 | -0.29482200 | -0.31229400 |
| C | 3.08623600  | 5.04440400  | 1.09021400  |
| H | 3.27799200  | 6.09020300  | 1.32183700  |
| C | 6.22753800  | -0.40331600 | 0.12504400  |
| H | 7.16556200  | 0.05599700  | -0.17993000 |
| C | -3.46882400 | -0.24586700 | 3.16762900  |
| H | -3.93339200 | -1.11073800 | 3.65781900  |
| H | -3.65100900 | 0.60526000  | 3.83548000  |
| C | -1.36030300 | -1.69631700 | 2.93804000  |
| H | -0.29740600 | -1.73606800 | 3.18441200  |
| C | -2.03087200 | -3.03363000 | 2.78327100  |
| H | -2.29569100 | -3.43577200 | 3.77552300  |
| H | -1.28608300 | -3.72725000 | 2.36859600  |

|   |             |             |             |
|---|-------------|-------------|-------------|
| C | 6.21254300  | -1.71056800 | 0.60732300  |
| H | 7.14206900  | -2.27242300 | 0.67550700  |
| C | 5.01626300  | -2.29830800 | 1.00647600  |
| H | 5.00847000  | -3.31749000 | 1.38707300  |
| C | -4.12187800 | 0.03410800  | 1.81034300  |
| H | -4.02470800 | 1.10462300  | 1.57769300  |
| H | -5.20592700 | -0.16629400 | 1.85322000  |
| H | -0.07950100 | 0.76442100  | 1.17155700  |
| H | 0.62843900  | -1.20657300 | 1.03236700  |
| H | 1.27494100  | 0.04334100  | 2.48253600  |
| B | 0.86809400  | -0.02969100 | 1.34702900  |
| H | -1.64010300 | 2.30344800  | -0.69655800 |
| H | -4.63550900 | 0.80155900  | -3.41515700 |
| H | -5.70881700 | 3.64821800  | -0.38433500 |
| H | -0.77703900 | -3.31220900 | -2.36679300 |
| H | 3.42935500  | -3.68667200 | -3.14365300 |

10

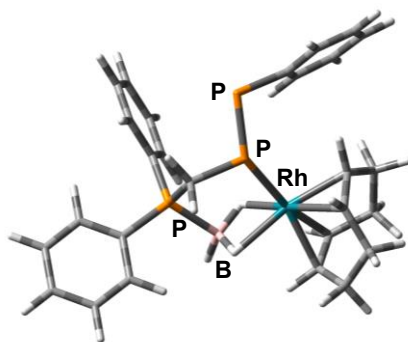

|    |             |             |             |
|----|-------------|-------------|-------------|
| Rh | -1.05375900 | -1.32598500 | 0.13091400  |
| P  | 2.34561400  | -0.10151300 | 0.01346600  |
| P  | -0.28664200 | 0.34055200  | -1.27308500 |
| B  | 1.21229800  | -1.37951300 | 0.93112200  |
| H  | 0.89960500  | -2.17808200 | 0.04056800  |
| H  | 0.25645300  | -0.69151200 | 1.38144900  |
| H  | 1.74397100  | -1.92830700 | 1.85989300  |
| C  | 1.52627900  | 0.13700500  | -1.62019500 |
| H  | 1.68721100  | -0.79153700 | -2.18649300 |
| H  | 1.94751800  | 0.97483500  | -2.19001400 |
| C  | -2.02892600 | -2.36302200 | 1.90587500  |
| H  | -1.45995900 | -1.94777000 | 2.74140200  |
| C  | -3.51870900 | -2.11948500 | 1.92315300  |
| H  | -3.82059600 | -1.86443600 | 2.94667200  |
| H  | -4.04442400 | -3.05196800 | 1.68193400  |
| C  | -3.93937200 | -0.99173100 | 0.97778900  |
| H  | -5.01550900 | -1.06028400 | 0.74409300  |
| H  | -3.80632500 | -0.02642800 | 1.48689600  |
| C  | -3.14104800 | -0.93315000 | -0.29630400 |
| H  | -3.21547900 | 0.03243800  | -0.80704700 |
| C  | -2.70936700 | -2.02896200 | -1.06692900 |
| H  | -2.44901100 | -1.81130600 | -2.10590900 |
| C  | -3.05522900 | -3.48024800 | -0.78576300 |
| H  | -4.05281000 | -3.53783700 | -0.33036900 |
| H  | -3.13934300 | -4.01426500 | -1.74014900 |

|   |             |             |             |
|---|-------------|-------------|-------------|
| C | -2.01229500 | -4.19160000 | 0.08410700  |
| H | -1.20019000 | -4.55852100 | -0.55913900 |
| H | -2.44671200 | -5.08851300 | 0.55641300  |
| C | -1.38666300 | -3.31436800 | 1.13375400  |
| H | -0.38219000 | -3.60676200 | 1.44734700  |
| C | 4.02552400  | -0.68030200 | -0.31371000 |
| C | 4.20661200  | -2.03360900 | -0.62341000 |
| H | 3.35245200  | -2.71184400 | -0.64129600 |
| C | 5.48098500  | -2.51573500 | -0.89166600 |
| H | 5.62371600  | -3.56826100 | -1.12700500 |
| C | 6.57480000  | -1.65430400 | -0.84633900 |
| H | 7.57295100  | -2.03660200 | -1.05006000 |
| C | 6.39761200  | -0.31028600 | -0.53310800 |
| H | 7.25457600  | 0.35847200  | -0.49075200 |
| C | 5.12502800  | 0.18085600  | -0.26535700 |
| H | 4.99176900  | 1.22980400  | -0.00369700 |
| C | 2.40662200  | 1.52323400  | 0.80028300  |
| C | 2.11395200  | 1.60884000  | 2.16498700  |
| H | 1.86637400  | 0.70920900  | 2.72821700  |
| C | 2.14582200  | 2.84259300  | 2.80681500  |
| H | 1.92358300  | 2.90512600  | 3.86991500  |
| C | 2.46270700  | 3.99167500  | 2.08967600  |
| H | 2.48484900  | 4.95648300  | 2.59235000  |
| C | 2.75375600  | 3.91304200  | 0.72948000  |
| H | 3.00243600  | 4.81231400  | 0.17004300  |
| C | 2.72682500  | 2.68296400  | 0.08382800  |
| H | 2.96094800  | 2.63237100  | -0.98033700 |
| P | -0.66238000 | 2.28215200  | -1.78731600 |
| C | -2.31818600 | 2.50201200  | -1.05195900 |
| C | -2.50585400 | 2.44514300  | 0.33682500  |
| C | -3.39794300 | 2.82734600  | -1.88307900 |
| C | -3.76354200 | 2.68836000  | 0.87816300  |
| H | -1.66233300 | 2.21688000  | 0.99099000  |
| C | -4.65828700 | 3.03958900  | -1.33704000 |
| H | -3.25410200 | 2.90118100  | -2.96109300 |
| C | -4.84162100 | 2.96940200  | 0.04240300  |
| H | -3.90315400 | 2.65803300  | 1.95773600  |
| H | -5.49837000 | 3.27294900  | -1.98795500 |
| H | -5.82603200 | 3.15162700  | 0.46900100  |

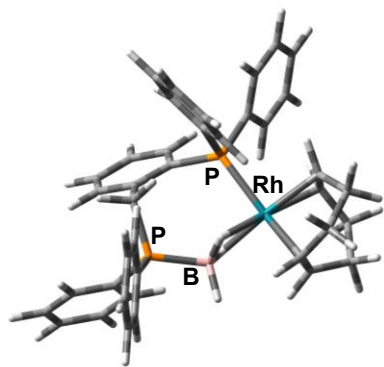

|   |             |             |             |
|---|-------------|-------------|-------------|
| C | 0.26124900  | 2.22307300  | 0.13314500  |
| C | -1.11178800 | 2.17599100  | 0.47121100  |
| C | 0.75848100  | 3.40970200  | -0.42198200 |
| C | -1.91295700 | 3.29306900  | 0.21316500  |
| C | -0.05696700 | 4.50450800  | -0.68035900 |
| C | -1.40661600 | 4.44590100  | -0.36826200 |
| H | -2.97033700 | 3.24701700  | 0.47679300  |
| H | 0.37483400  | 5.40505900  | -1.11213900 |
| C | -1.80414800 | 0.99618700  | 1.09586400  |
| H | -2.63062800 | 1.33599600  | 1.73679300  |
| H | -1.13635400 | 0.39421200  | 1.72371400  |
| P | -2.52196400 | -0.12391100 | -0.17374300 |
| H | -0.45683400 | -0.29514400 | -1.82470700 |
| H | -0.57006500 | -1.55847500 | -0.16181300 |
| H | -1.70782000 | -1.91303400 | -1.80527700 |
| B | -1.16035100 | -1.05787300 | -1.15122300 |
| C | 1.90648000  | -4.11560800 | -0.40054700 |
| H | 1.46014100  | -4.18773800 | 0.60187300  |
| C | 2.48410700  | -2.90078700 | -3.23540700 |
| H | 3.00395900  | -3.82612300 | -2.95505600 |
| H | 2.29239500  | -2.98107200 | -4.31267400 |
| C | 1.16624500  | -2.81901800 | -2.50703800 |
| C | 0.91606300  | -3.40232000 | -1.27920800 |
| H | 2.02821700  | -5.15625200 | -0.74554000 |
| C | 3.26380500  | -3.41705100 | -0.29369300 |
| H | 3.73562300  | -3.70007600 | 0.65583500  |
| H | 3.94921900  | -3.76961500 | -1.07709100 |
| C | 3.36026400  | -1.68015600 | -2.96195800 |
| H | 4.41677900  | -1.89561700 | -3.19614500 |
| H | 3.06186900  | -0.86733000 | -3.64063900 |
| C | 3.15901600  | -1.90341900 | -0.36523000 |
| C | 3.23968800  | -1.15173200 | -1.55688400 |
| H | 3.47635000  | -1.38379600 | 0.54583500  |
| H | 3.63752400  | -0.14306900 | -1.45390700 |
| H | 0.29705100  | -2.52123800 | -3.09806100 |
| H | -0.12953400 | -3.56824900 | -1.01650500 |

|    |             |             |             |
|----|-------------|-------------|-------------|
| Rh | 1.19890200  | -1.18822700 | -0.90708500 |
| H  | -2.06083400 | 5.29394400  | -0.55860900 |
| H  | 1.81649700  | 3.50559200  | -0.64294600 |
| P  | 1.42701900  | 0.79427300  | 0.40742100  |
| C  | 1.18226300  | 0.42023100  | 2.18584500  |
| C  | 1.09647100  | -0.90429000 | 2.62457200  |
| C  | 1.02546200  | 1.46174900  | 3.10939100  |
| C  | 0.84434000  | -1.18361400 | 3.96590500  |
| H  | 1.20594600  | -1.71534800 | 1.90119700  |
| C  | 0.77624100  | 1.17990300  | 4.44633700  |
| H  | 1.08612200  | 2.49859600  | 2.77601400  |
| C  | 0.68020700  | -0.14320700 | 4.87448600  |
| H  | 0.77458800  | -2.21721900 | 4.29973300  |
| H  | 0.65174800  | 1.99366600  | 5.15806800  |
| H  | 0.47820100  | -0.36169500 | 5.92140100  |
| C  | 3.09299400  | 1.56588600  | 0.34912900  |
| C  | 3.92176000  | 1.62154300  | 1.47214700  |
| C  | 3.58302000  | 2.04781000  | -0.87531200 |
| C  | 5.19970200  | 2.16915700  | 1.37832800  |
| H  | 3.57433700  | 1.23844000  | 2.42996400  |
| C  | 4.85096600  | 2.60607300  | -0.96326800 |
| H  | 2.96317200  | 1.98165000  | -1.77249100 |
| C  | 5.66286900  | 2.66774100  | 0.16758100  |
| H  | 5.83294500  | 2.20483700  | 2.26258600  |
| H  | 5.21106800  | 2.98472900  | -1.91782500 |
| H  | 6.65954000  | 3.09892500  | 0.09893700  |
| C  | -3.65056600 | 0.89298900  | -1.14729400 |
| C  | -3.21994700 | 1.39267700  | -2.37830900 |
| C  | -4.89198400 | 1.27983000  | -0.62883500 |
| C  | -4.02337600 | 2.28202900  | -3.08423800 |
| H  | -2.25169700 | 1.09101200  | -2.77866300 |
| C  | -5.69044800 | 2.16717400  | -1.33857100 |
| H  | -5.23364400 | 0.88276800  | 0.32828100  |
| C  | -5.25360200 | 2.66981200  | -2.56329900 |
| H  | -3.68796900 | 2.67058100  | -4.04353700 |
| H  | -6.65691000 | 2.46749000  | -0.93893000 |
| H  | -5.88201200 | 3.36410000  | -3.11780100 |
| C  | -3.51383700 | -1.33871700 | 0.73245200  |
| C  | -4.48427700 | -2.06852800 | 0.03623900  |
| C  | -3.25799100 | -1.63080700 | 2.07548300  |
| C  | -5.20316500 | -3.06425600 | 0.68482000  |
| H  | -4.68095600 | -1.85337200 | -1.01456500 |
| C  | -3.98037000 | -2.63118900 | 2.71876900  |
| H  | -2.49408500 | -1.08596300 | 2.63090200  |
| C  | -4.95310500 | -3.34401000 | 2.02593600  |
| H  | -5.96180600 | -3.62427000 | 0.14201500  |
| H  | -3.78288200 | -2.85123700 | 3.76598900  |
| H  | -5.51770900 | -4.12450600 | 2.53209500  |



8c

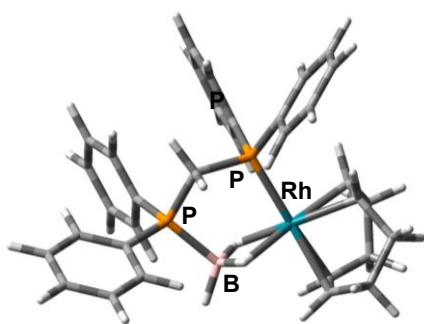

|    |             |             |             |
|----|-------------|-------------|-------------|
| Rh | 1.48786800  | -0.75849200 | -0.90844200 |
| P  | -2.01582800 | -0.80096900 | -0.11530700 |
| P  | 0.56889900  | 0.47895700  | 0.83152500  |
| B  | -0.70859900 | -1.55539500 | -1.33290800 |
| H  | 0.05322700  | -2.20036900 | -0.59130200 |
| H  | -0.18510100 | -0.55146600 | -1.87112600 |
| H  | -1.18932500 | -2.25611900 | -2.18482900 |
| C  | -1.04684000 | -0.27720700 | 1.35588400  |
| H  | -0.83251400 | -1.20903000 | 1.89890300  |
| H  | -1.60421900 | 0.38452900  | 2.03190900  |
| C  | 2.37365600  | -1.33095600 | -2.93174700 |
| H  | 1.51101700  | -1.22141900 | -3.59355800 |
| C  | 3.56944200  | -0.46068400 | -3.23894800 |
| H  | 3.49974600  | -0.11990300 | -4.27962900 |
| H  | 4.48455100  | -1.06377900 | -3.18561900 |
| C  | 3.66453200  | 0.75762700  | -2.31682500 |
| H  | 4.68650900  | 1.17289800  | -2.33016800 |
| H  | 3.01432000  | 1.55405700  | -2.70909100 |
| C  | 3.23215600  | 0.48168100  | -0.89919700 |
| H  | 3.03628100  | 1.39678300  | -0.32794500 |
| C  | 3.49986200  | -0.68389000 | -0.14745300 |
| H  | 3.43833000  | -0.57729900 | 0.93943100  |
| C  | 4.36124000  | -1.84119000 | -0.62091000 |
| H  | 5.15198400  | -1.46742600 | -1.28509500 |
| H  | 4.88480600  | -2.26956100 | 0.24278200  |
| C  | 3.54932800  | -2.94845800 | -1.30090600 |
| H  | 3.13937000  | -3.61389500 | -0.52813800 |
| H  | 4.20025900  | -3.58159800 | -1.92683300 |
| C  | 2.38865700  | -2.44455600 | -2.11533800 |
| H  | 1.55792200  | -3.14648600 | -2.22279600 |
| C  | -3.24390700 | -1.98174700 | 0.49325500  |

|   |             |             |             |
|---|-------------|-------------|-------------|
| C | -2.83085900 | -3.30254600 | 0.70487800  |
| H | -1.80743900 | -3.59998700 | 0.47146300  |
| C | -3.73058000 | -4.23942700 | 1.19660100  |
| H | -3.41005500 | -5.26669200 | 1.35673300  |
| C | -5.04381600 | -3.86487900 | 1.47009200  |
| H | -5.74962500 | -4.60073200 | 1.85018800  |
| C | -5.45935600 | -2.55493700 | 1.25132600  |
| H | -6.48817000 | -2.26721000 | 1.45742300  |
| C | -4.56325700 | -1.61046100 | 0.76291300  |
| H | -4.89665800 | -0.58925700 | 0.58027600  |
| C | -2.87652600 | 0.64159100  | -0.77985700 |
| C | -3.01580700 | 0.73229400  | -2.16881400 |
| H | -2.59758000 | -0.04355000 | -2.81027400 |
| C | -3.68882000 | 1.81103700  | -2.73131300 |
| H | -3.79904400 | 1.87717100  | -3.81159700 |
| C | -4.21574600 | 2.80449500  | -1.91172100 |
| H | -4.73790600 | 3.65110500  | -2.35327500 |
| C | -4.08189400 | 2.71781200  | -0.52793800 |
| H | -4.49279000 | 3.49599300  | 0.11214800  |
| C | -3.41652200 | 1.63836800  | 0.03998000  |
| H | -3.32090700 | 1.57850200  | 1.12468500  |
| C | 0.08528400  | 2.18851900  | 0.42496400  |
| C | -0.39458400 | 3.05834200  | 1.41259800  |
| C | 0.10907400  | 2.60659200  | -0.90849000 |
| C | -0.82960200 | 4.33142100  | 1.06812700  |
| H | -0.41480800 | 2.74606700  | 2.45796200  |
| C | -0.34150000 | 3.87773000  | -1.25195100 |
| H | 0.47277800  | 1.92189600  | -1.67758000 |
| C | -0.80295600 | 4.74100600  | -0.26422000 |
| H | -1.18976500 | 5.00870600  | 1.84021800  |
| H | -0.32313300 | 4.19617400  | -2.29234600 |
| H | -1.14390600 | 5.73952100  | -0.53109300 |
| C | 1.53827800  | 0.56428500  | 2.37149300  |
| C | 1.64420700  | -0.57850300 | 3.17419700  |
| C | 2.31253300  | 1.68836100  | 2.67666100  |
| C | 2.48533100  | -0.58430500 | 4.27939900  |
| H | 1.08290300  | -1.48169600 | 2.92959800  |
| C | 3.15916500  | 1.67550600  | 3.78117700  |
| H | 2.25398300  | 2.58222600  | 2.05605600  |
| C | 3.24299100  | 0.54391100  | 4.58489600  |
| H | 2.55246300  | -1.47395200 | 4.90230600  |
| H | 3.75368700  | 2.55648000  | 4.01443300  |
| H | 3.90269800  | 0.53763800  | 5.45008300  |

## 8. References

- S1. S. Kimura, E. Bill, E. Bothe, T. Weyhermüller and K. Wieghardt, *J. Am. Chem. Soc.*, 2001, **123**, 6025-6039.
- S2. N. Khiar, R. Navas and I. Fernández, *Tetrahedron Lett.*, 2012, **53**, 395-398.
- S3. G. Courtois and L. Miginiac, *Tetrahedron Lett.*, 1987, **28**, 1659-1660.
- S4. (a) J. Bresien, C. Hering, A. Schulz and A. Villinger, *Chem. – Eur. J.*, 2014, **20**, 12607-12615; (b) A. H. Cowley, J. E. Kilduff, T. H. Newman and M. Pakulski, *J. Am. Chem. Soc.*, 1982, **104**, 5820-5821.
- S5. T. G. Schenck, J. M. Downes, C. R. C. Milne, P. B. Mackenzie, H. Boucher, J. Whelan and B. Bosnich, *Inorg. Chem.*, 1985, **24**, 2334-2337.
- S6. Y. Ma, F. Chen, J. Bao, H. Wei, M. Shi and F. Wang, *Tetrahedron Lett.*, 2016, **57**, 2465-2467.
- S7. K. Xu, N. Thieme and B. Breit, *Angew. Chem., Int. Ed.*, 2014, **53**, 2162-2165.
- S8. (a) P. Pertici, F. D. Arata and C. Rosini, *J. Organomet. Chem.*, 1996, **515**, 163-171; (b) R. Uson, L. A. Oro, C. Claver and M. A. Garralda, *J. Organomet. Chem.*, 1976, **105**, 365-370.
- S9. M. C. Burla, R. Caliendo, B. Carrozzini, G. L. Cascarano, C. Cuocci, C. Giacobuzzo, M. Mallamo, A. Mazzone and G. Polidori, *J. Appl. Cryst.*, 2015, **48**, 306-309.
- S10. G. M. Sheldrick, *Acta Cryst.*, 2008, **A64**, 112-122.
- S11. C. Kabuto, S. Akine, T. Nemoto and E. Kwon, *J. Cryst. Soc. Jpn.*, 2009, **51**, 218-224.
- S12. G. M. Sheldrick, *Acta Cryst.*, 2015, **C71**, 3-8.
- S13. M. Yoshifuji, I. Shima, N. Inamoto, K. Hirotsu and T. Higuchi, *J. Am. Chem. Soc.*, 1981, **103**, 4587-4589.
- S14. R. C. Smith, E. Urnezis, K.-C. Lam, A. L. Rheingold and J. D. Protasiewicz, *Inorg. Chem.*, 2002, **41**, 5296-5299.
- S15. A. Tsurusaki, R. Ura and K. Kamikawa, *Dalton Trans.*, 2018, **47**, 4437-4441.
- S16. M. Ingleson, N. J. Patmore, G. D. Ruggiero, C. G. Frost, M. F. Mahon, M. C. Willis and A. S. Weller, *Organometallics*, 2001, **20**, 4434-4436.
- S17. D. H. Nguyen, H. Lauréano, S. Jugé, P. Kalck, J.-C. Daran, Y. Coppel, M. Urrutigoity and M. Gouygou, *Organometallics*, 2009, **28**, 6288-6292.
- S18. M. J. Frisch, G. W. Trucks, H. B. Schlegel, G. E. Scuseria, M. A. Robb, J. R. Cheeseman, G. Scalmani, V. Barone, B. Mennucci, G. A. Petersson, H. Nakatsuji, M. Caricato, X. Li, H. P. Hratchian, A. F. Izmaylov, J. Bloino, G. Zheng, J. L. Sonnenberg, M. Hada, M. Ehara, K. Toyota, R. Fukuda, J. Hasegawa, M. Ishida, T. Nakajima, Y. Honda, O. Kitao, H. Nakai, T. Vreven, J. A. Montgomery, Jr., J. E. Peralta, F. Ogliaro, M. Bearpark, J. J. Heyd, E. Brothers, K. N. Kudin, V. N. Staroverov, T. Keith, R. Kobayashi, J. Normand, K. Raghavachari, A. Rendell, J. C. Burant, S. S. Iyengar, J. Tomasi, M. Cossi, N. Rega, J. M. Millam, M. Klene, J. E. Knox, J. B. Cross, V. Bakken, C. Adamo, J. Jaramillo, R. Gomperts, R. E. Stratmann, O. Yazyev, A. J. Austin, R. Cammi, C. Pomelli, J. W. Ochterski, R. L. Martin, K. Morokuma, V. G. Zakrzewski, G. A. Voth, P. Salvador, J. J. Dannenberg, S. Dapprich, A. D. Daniels, O. Farkas, J. B. Foresman, J. V. Ortiz, J. Cioslowski and D. J. Fox, *Gaussian 09, Revision E.01*, Gaussian, Inc., Wallingford CT, 2013.

- S19. Y. Zhao and D. G. Truhlar, *Theor. Chem. Acc.*, 2008, **120**, 215-241.
- S20. D. Andrae, U. Häußermann, M. Dolg, H. Stoll and H. Preuß, *Theor. Chim. Acta*, 1990, **77**, 123-141.
- S21. NBO 7.0. E. D. Glendening, J. K. Badenhoop, A. E. Reed, J. E. Carpenter, J. A. Bohmann, C. M. Morales, P. Karafiloglou, C. R. Landis and F. Weinhold, Theoretical Chemistry Institute, University of Wisconsin, Madison, WI, 2018.
- S22. C. Adamo and V. Barone, *J. Chem. Phys.*, 1999, **110**, 6158-6170.
- S23. M. Cossi, V. Barone, R. Cammi and J. Tomasi, *Chem. Phys. Lett.*, 1996, **255**, 327-335.
